# Supplementary material for: I2-induced cascade cyclization and dearomatization of indoles for the highly efficient synthesis of iodinated and vinylic spiroindolenines
Source: Royal Society of Chemistry journal article supplement (doi:10.1039/d1gc02713a), 2021-01-01
Supplement: d1gc02713a1.pdf [file d1gc02713a1.pdf]

## Electronic Supplementary Information

### **I<sub>2</sub>-induced cascade cyclization and dearomatization of indoles for the highly efficient synthesis of iodinated and vinylic spiroindolenines**

Xiaohui Wei,<sup>‡, a, b</sup> Xuewu Liang,<sup>‡, b</sup> Yazhou Li,<sup>b</sup> Qi Liu,<sup>b</sup> Xuyi Liu,<sup>b</sup> Yu Zhou,<sup>\*, b</sup> Hong Liu.<sup>\*, a, b</sup>

<sup>a</sup> China Pharmaceutical University, 639 Longmian Avenue, Jiangning District, Nanjing 211198, China.

<sup>b</sup> State Key Laboratory of Drug Research, Shanghai Institute of Materia Medica, Chinese Academy of Sciences, 555 Zu Chong Zhi Road, Shanghai, 201203, China.

<sup>‡</sup> Xiaohui Wei and Xuewu Liang contributed equally.

<sup>\*</sup> Corresponding authors, E-mail: [zhouyu@simm.ac.cn](mailto:zhouyu@simm.ac.cn), [hliu@simm.ac.cn](mailto:hliu@simm.ac.cn).

## CONTENTS

|                                                                                                            |      |
|------------------------------------------------------------------------------------------------------------|------|
| 1. General Information.....                                                                                | S3   |
| 2. General procedure for the synthesis of <b>1a–1x</b> and <b>4a–4k</b> .....                              | S3   |
| 3. General procedure for the synthesis of halogenated spiroindolenines <b>2a–2x</b> and <b>3a–3e</b> ..... | S4   |
| 4. General procedure for the synthesis of vinylic spiroindolenines <b>5a–5k</b> .....                      | S4   |
| 5. Optimization of the reaction conditions for <b>2a</b> .....                                             | S4   |
| 6. The substrate scope for the brominated spiroindolenines.....                                            | S6   |
| 7. Optimization of the reaction conditions for <b>5a</b> .....                                             | S6   |
| 8. Transformations of the products.....                                                                    | S7   |
| 9. Mechanism experiments.....                                                                              | S10  |
| 10. Characterization data of <b>1a–1x</b> and <b>4a–4k</b> .....                                           | S12  |
| 11. Characterization data of <b>2a–2y</b> , <b>3a–3g</b> and <b>5a–5k</b> and <b>6-16</b> .....            | S23  |
| 12. References.....                                                                                        | S40  |
| 13. Characterization spectra of <b>2a–2y</b> , <b>3a–3g</b> , <b>5a–5k</b> and <b>6-16</b> .....           | S41  |
| 14. X-Ray structures and data.....                                                                         | S100 |

## 1. General Information

The glass instruments needed in the experiment were all standard dried. Unless specified otherwise, all solvents in the optimization of conditions were anhydrous solvents purchased by the reagent company without further purification. Column chromatography was performed on silica gel (300-400 mesh) using n-hexane/ethyl acetate. Thin-layer chromatography (TLC) plates were visualized by exposure to ultraviolet light.  $^1\text{H}$  and  $^{13}\text{C}$  NMR spectra were recorded on an Agilent instrument (400 MHz and 100 MHz, 500 and 125 MHz, or 600 and 150MHz respectively). The spectra were recorded in Chloroform-*d* or DMSO-*d*<sub>6</sub> as solvents at room temperature. Chemical shifts were expressed in parts per million ( $\delta$ ), and were reported as s (singlet), d (doublet), t (triplet), dd (doublet of doublets), m (multiplet), etc. High resolution mass spectra (HRMS) were measured on a Micromass Ultra Q-TOF spectrometer. Melting Points were measured in open capillary tubes by SGW (X-4B) melting point apparatus.

## 2. General procedure for the synthesis of 1a–1x and 4a-4k

Substrates **1a-1x** and **4a-4k** were synthesized according to the literature procedures<sup>1</sup> (Taking **1a** as an Example).

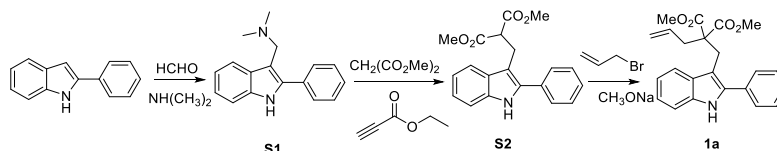

In a round bottom flask, 2.0 mL of formaldehyde (40% in aqueous solution), then a catalytic amount of acetic acid and 1.2 mL of dimethylamine aqueous solution (32% in aqueous solution) were added and the mixture were stirred at 0 °C for 10 minutes. Then, a 1,4-dioxane solution of 1g indole homologue was added into the reaction system, and the mixture was stirred at room temperature. After the completion of the reaction, 2 N sodium hydroxide solution was added to adjust the pH to neutral and the resulting crude product was extracted with 50 mL of ethyl acetate three times, then the solvent was removed under reduced pressure concentrated to obtain **S1** (**N,N-dimethyl-1-(2-phenyl-1H-indol-3-yl)methanamine**) 0.9 g without further treatment. After dissolving 3.2 mmol of **S1** in 20 mL ether, 4 mmol of ethyl propiolate and 4mmol of diethyl malonate were added and the reaction mixture was stirred vigorously at room temperature. After monitoring the completion of the reaction by TLC, the solvent was then removed under reduced pressure and the resulting crude product was purified by column chromatography to afford the desired product dimethyl **S2** (**2-((2-phenyl-1H-indol-3-yl)methyl)malonate**) in 52% yield. Dissolve 1.2 mmol of **S2** with tetrahydrofuran in a three-necked flask, add 1.5 mmol of methanol sodium under argon protection, and stir for half hour at 0 °C. Then add 1.5 mmol of allyl bromide and stir for 2 h. After the reaction was complete, add water to the system for quenching and extract with DCM (40 mL×3). The organic layer was then dried with Na<sub>2</sub>SO<sub>4</sub> and concentrated by rotary evaporation to give the crude product. The crude product was purified by silica gel column chromatography to give **1a** (**dimethyl 2-allyl-2-((2-phenyl-1H-indol-3-yl)methyl)malonate**) (0.32g, 0.85mmol, 71%).

### 3. General procedure for the synthesis of halogenated spiroindolenines 2a-2x and 3a-3e

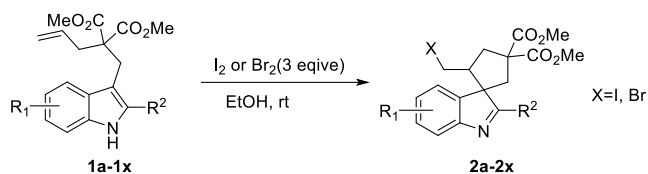

The indole derivatives (0.1 mmol) and  $I_2$  or  $Br_2$  (3 equiv.) were dissolved in EtOH (1.5 mL) and the mixture was stirred for 30 min or 2 h at room temperature in a flask. Then the reaction was quenched by saturated sodium thiosulfate aqueous solution and extracted with EtOAc (20 mL $\times$ 3). The organic layer was then dried with  $Na_2SO_4$  and concentrated by rotary evaporation to give the crude product. The crude product was purified by silica gel column chromatography or PTLC to afford the major diastereomer of halogenated spiroindolenines.

### 4. General procedure for the synthesis of vinylic spiroindolenines 5a-5k

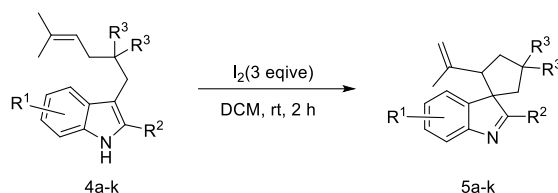

The indole derivatives (0.1 mmol) and  $I_2$  (3 equiv.) were dissolved in DCM (1.5 mL) or water (2.0 mL) and the mixture was stirred for 30 min at room temperature in a flask. Then the reaction was quenched by saturated sodium thiosulfate aqueous solution and extracted with EtOAc (20 mL $\times$ 3). The organic layer was then dried with  $Na_2SO_4$  and concentrated by rotary evaporation to give the crude product. The crude product was purified by silica gel column chromatography or PTLC to afford the major diastereomer of vinylic spiroindolenines.

### 5. Optimization of the reaction conditions for 2a

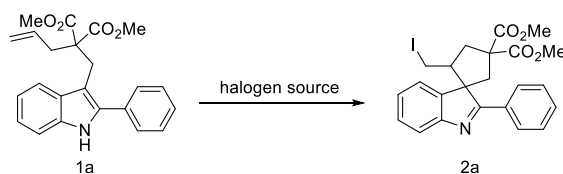

Table S1. Optimization of reaction condition for halogenated spiroindolenines<sup>a</sup>

| Entry | Halogen Source | Additive | Base | Solvent | Time (h) | Temp. (°C) | Yield <sup>b</sup> (%) |
|-------|----------------|----------|------|---------|----------|------------|------------------------|
| 1     | CuI            | AIBN     | —    | DMF     | 12       | 90         | 41                     |

|                 |                 |      |                                 |                               |     |    |                 |
|-----------------|-----------------|------|---------------------------------|-------------------------------|-----|----|-----------------|
| 2               | CuI             | AIBN | —                               | DCE                           | 12  | 90 | NR <sup>c</sup> |
| 3               | CuI             | AIBN | —                               | DMF/H <sub>2</sub> O<br>(3/1) | 12  | 90 | 50              |
| 4               | CuI             | AIBN | —                               | EA                            | 12  | 90 | ND <sup>d</sup> |
| 5               | CuI             | AIBN | —                               | 1,4-dioxane                   | 12  | 90 | 56              |
| 6               | CuI             | AIBN | K <sub>3</sub> PO <sub>4</sub>  | 1,4-dioxane                   | 12  | 90 | 64              |
| 7               | CuI             | AIBN | K <sub>3</sub> CO <sub>4</sub>  | 1,4-dioxane                   | 12  | 90 | trace           |
| 8               | CuI             | AIBN | Cs <sub>2</sub> CO <sub>4</sub> | 1,4-dioxane                   | 12  | 90 | 14              |
| 9               | CuI             | AIBN | K <sub>3</sub> PO <sub>4</sub>  | 1,4-dioxane                   | 12  | 90 | 78              |
| 10              | CuI             | AIBN |                                 | DCM                           | 12  | 60 | 69              |
| 11              | KI              | AIBN | K <sub>3</sub> PO <sub>4</sub>  | 1,4-dioxane                   | 12  | 90 | trace           |
| 12              | NIS             | AIBN | —                               | 1,4-dioxane                   | 12  | 90 | 81              |
| 13              | NIS             | DTBP | —                               | 1,4-dioxane                   | 12  | 90 | trace           |
| 14              | NIS             | —    | —                               | 1,4-dioxane                   | 12  | 90 | 70              |
| 15              | NIS             | —    | —                               | DCM                           | 12  | rt | 69              |
| 16              | I <sub>2</sub>  | —    | —                               | DCM                           | 2   | rt | 97              |
| 17              | I <sub>2</sub>  | —    | —                               | H <sub>2</sub> O              | 2   | rt | 88              |
| 18              | I <sub>2</sub>  | —    | —                               | EtOH                          | 0.5 | rt | 98              |
| 19 <sup>e</sup> | I <sub>2</sub>  | —    | —                               | EtOH                          | 4   | rt | 94              |
| 20 <sup>f</sup> | I <sub>2</sub>  | —    | —                               | EtOH                          | 4   | rt | 63              |
| 21 <sup>f</sup> | I <sub>2</sub>  | —    | —                               | EtOH                          | 10  | rt | ND <sup>d</sup> |
| 22              | Br <sub>2</sub> | —    | —                               | EtOH                          | 0.5 | 90 | 34              |
| 23              | NBS             | AIBN | —                               | 1,4-dioxane                   | 12  | 90 | 31              |

|    |       |      |             |    |    |       |
|----|-------|------|-------------|----|----|-------|
| 24 | NBS   | —    | EtOH        | 12 | rt | 28    |
| 25 | DBDMH | —    | EtOH        | 12 | rt | trace |
| 26 | NCS   | AIBN | 1,4-dioxane | 12 | 90 | —     |

<sup>a</sup>Reaction conditions: **1a** (0.1 mmol), halogen source (3 equiv.), additive (2 equiv.), base (2 equiv.), solvent (1.5 mL), under air condition.

<sup>b</sup> Isolated yield. <sup>c</sup> No reaction. <sup>d</sup> Not detected. <sup>e</sup> I<sub>2</sub>: 2 equiv.. <sup>f</sup> I<sub>2</sub>: 1 equiv..

## 6. The substrate scope for brominated spiroindolenines

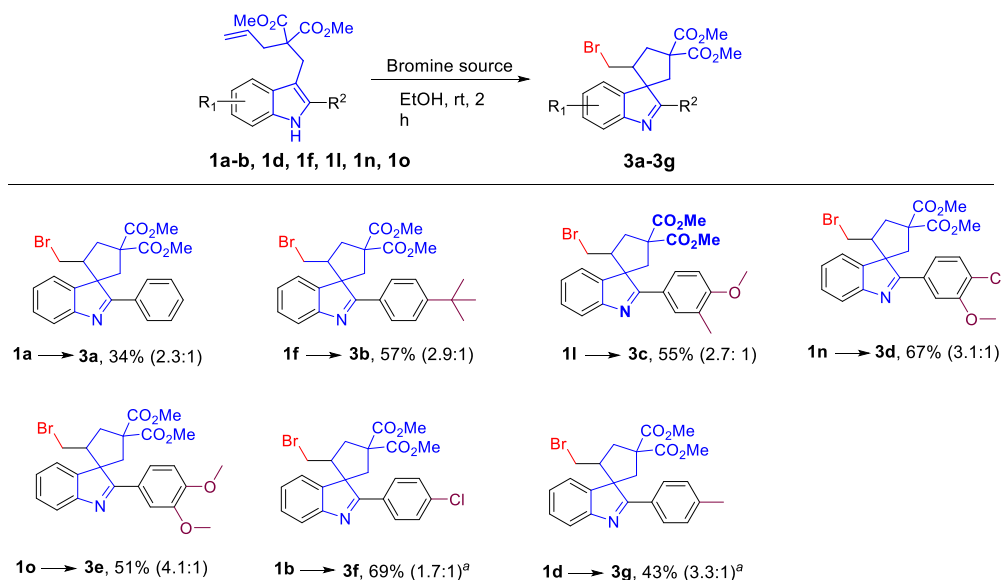

**Scheme S1** Reaction conditions: Indole derivative (0.1 mmol), Br<sub>2</sub> (3 equiv.), ethanol (1.5 mL), rt, under air condition for 2 h. Isolated yields. The *dr* value is determined by <sup>1</sup>H NMR analysis of the crude product. <sup>a</sup> Reaction condition: Table S1, Entry 23, NBS, AIBN.

Brominated spiroindolenines were tried under the same condition for iodinated compounds, whose efficiency was relative higher than that of brominated. The green brominated reagent, such as NBS and DBDMH, was also tried in different condition.

## 7. Optimization of the reaction conditions for 5a

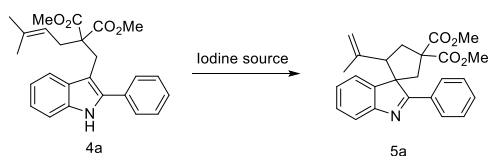

**Table S2. Optimization of reaction condition for vinylic spiroindolenines<sup>a</sup>**

| Entry | Iodine source | Additive | Solvent | Time (h) | Temp. (°C) | Yield (%) <sup>b</sup> |
|-------|---------------|----------|---------|----------|------------|------------------------|
|-------|---------------|----------|---------|----------|------------|------------------------|

|                |                |      |                  |    |    |    |
|----------------|----------------|------|------------------|----|----|----|
| 1              | I <sub>2</sub> | —    | EtOH             | 2  | rt | 84 |
| 2              | I <sub>2</sub> | —    | DCM              | 2  | rt | 96 |
| 3              | I <sub>2</sub> | —    | H <sub>2</sub> O | 2  | rt | 88 |
| 4              | NIS            | AIBN | 1,4-dioxane      | 12 | 90 | 61 |
| 5              | NIS            | —    | DCM              | 2  | rt | 63 |
| 6 <sup>c</sup> | I <sub>2</sub> | —    | DCM              | 4  | rt | 60 |
| 7 <sup>d</sup> | I <sub>2</sub> | —    | DCM              | 4  | rt | 84 |
| 8 <sup>c</sup> | I <sub>2</sub> | —    | H <sub>2</sub> O | 4  | rt | 38 |
| 9 <sup>d</sup> | I <sub>2</sub> | —    | H <sub>2</sub> O | 4  | rt | 79 |

<sup>a</sup> Reaction conditions: **4a** (0.1 mmol), iodine source (3 equiv.), additive (2 equiv.), solvent (1.5 mL), under air condition. <sup>b</sup> Isolated yield.

<sup>c</sup> I<sub>2</sub> (1 equiv.). <sup>d</sup> I<sub>2</sub> (2 equiv.).

## 8. Transformations of the products

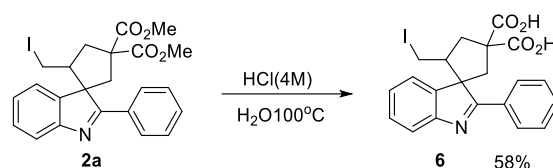

**Scheme S2** (0.1 mmol) and 3 M aqueous HCl (1.5 mL) were added into a flask. After the reaction mixture was heated to 100 °C for 10 h, solid was precipitated out of the reaction solution and filtered out to afford product **6** (27mg).

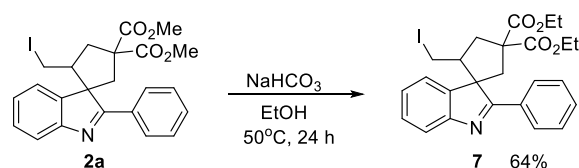

**Scheme S3 2a** (0.1 mmol) and NaHCO<sub>3</sub> (0.3 mmol) were added into a flask. The reaction mixture in ethanol was heated to 50 °C for 24 h. After the reaction is complete, the solution was diluted with ethyl acetate and repeatedly washed with brine. The organic extract were dried with Na<sub>2</sub>SO<sub>4</sub>, concentrated by rotary evaporation and purified by silica gel column chromatography to afford product **7** (34 mg).

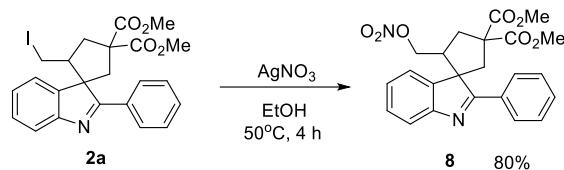

**Scheme S4** **2a** (0.1 mmol) and  $\text{AgNO}_3$  (0.2 mmol) were added into a flask. The reaction mixture in ethanol was heated to  $70^\circ\text{C}$  for 2 h. After the reaction is complete, the solution was diluted with ethyl acetate and repeatedly washed with brine. The organic extracts were dried with  $\text{Na}_2\text{SO}_4$ , concentrated by rotary evaporation and purified by silica gel column chromatography to afford product **8** (35 mg).

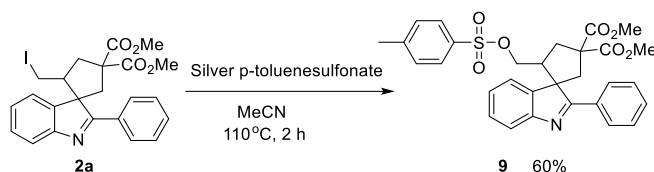

**Scheme S5** **2a** (0.15 mmol) and silver p-toluenesulfonate (0.17 mmol) were added into a flask. The reaction mixture in acetonitrile was heated to  $110^\circ\text{C}$  for 4 h. After the reaction is complete, the solution was diluted with ethyl acetate and repeatedly washed with sodium carbonate saturated solution and brine. The organic extracts were dried with  $\text{Na}_2\text{SO}_4$ , concentrated by rotary evaporation and purified by silica gel column chromatography to afford product **9** (49 mg).

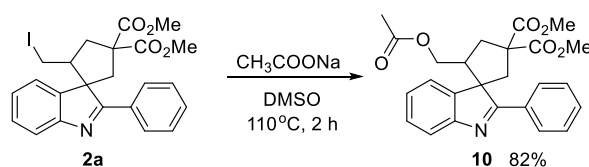

**Scheme S6** **2a** (0.1 mmol) and  $\text{CH}_3\text{COONa}$  (0.15 mmol) were added into a flask. The reaction mixture in dimethyl sulfoxide was heated to  $110^\circ\text{C}$  for 2 h. After the reaction is complete, the solution was diluted with ethyl acetate and repeatedly washed with sodium carbonate saturated solution and brine. The organic extracts were dried with  $\text{Na}_2\text{SO}_4$ , concentrated by rotary evaporation and purified by silica gel column chromatography to afford product **10** (36 mg).

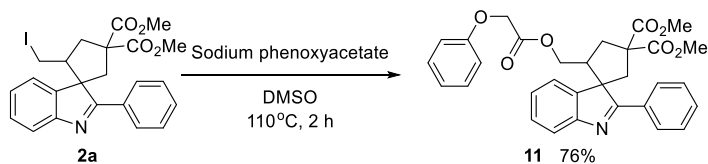

**Scheme S7** **2a** (0.15 mmol) and sodium phenoxyacetate (0.17 mmol) were added into a flask. The reaction mixture in dimethyl sulfoxide was heated to  $110^\circ\text{C}$  for 2 h. After the reaction is complete, the solution was diluted with ethyl



acetate and repeatedly washed with sodium carbonate saturated solution and brine. The organic extracts were dried with  $\text{Na}_2\text{SO}_4$ , concentrated by rotary evaporation and purified by silica gel column chromatography to afford product **11** (60 mg).

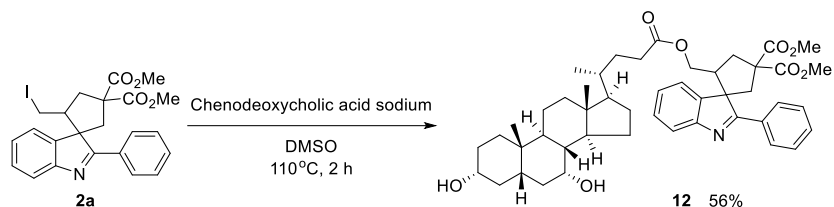

**Scheme S8** **2a** (0.15 mmol) and chenodeoxycholic acid sodium (0.17 mmol) were added into a flask. The reaction mixture in dimethyl sulfoxide was heated to 110°C for 2 h. After the reaction is complete, the solution was diluted with ethyl acetate and repeatedly washed with sodium carbonate saturated solution and brine. The organic extracts were dried with  $\text{Na}_2\text{SO}_4$ , concentrated by rotary evaporation and purified by silica gel column chromatography to afford product **12** (64 mg).

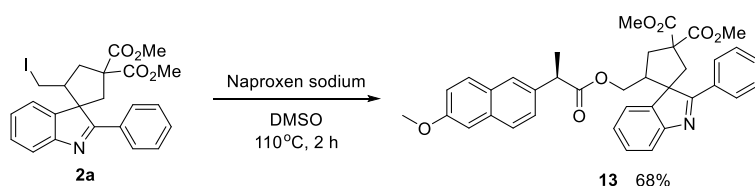

**Scheme S9** **2a** (0.15 mmol) and Naproxen sodium (0.17 mmol) were added into a flask. The reaction mixture in dimethyl sulfoxide was heated to 110°C for 2 h. After the reaction is complete, the solution was diluted with ethyl acetate and repeatedly washed with sodium carbonate saturated solution and brine. The organic extracts were dried with  $\text{Na}_2\text{SO}_4$ , concentrated by rotary evaporation and purified by silica gel column chromatography to afford product **13** (60 mg).

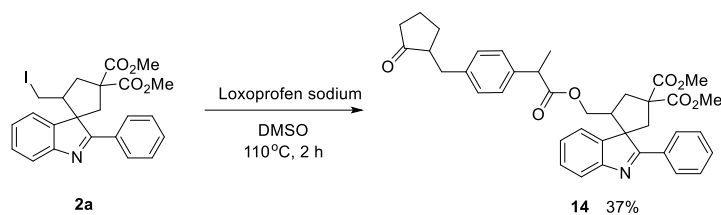

**Scheme S10** **2a** (0.15 mmol) and Loxoprofen sodium (0.17 mmol) were added into a flask. The reaction mixture in dimethyl sulfoxide was heated to 110°C for 2 h. After the reaction is complete, the solution was diluted with ethyl acetate and repeatedly washed with sodium carbonate saturated solution and brine. The organic extracts were dried with  $\text{Na}_2\text{SO}_4$ , concentrated by rotary evaporation and purified by silica gel column chromatography to afford product **14** (34 mg).

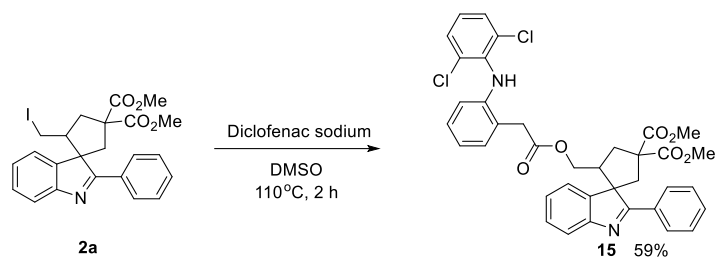

**Scheme S11** **2a** (0.15 mmol) and Diclofenac sodium (0.17 mmol) were added into a flask. The reaction mixture in dimethyl sulfoxide was heated to 110°C for 2 h. After the reaction is complete, the solution was diluted with ethyl acetate and repeatedly washed with sodium carbonate saturated solution and brine. The organic extracts were dried with Na<sub>2</sub>SO<sub>4</sub>, concentrated by rotary evaporation and purified by silica gel column chromatography to afford product **15** (59 mg).

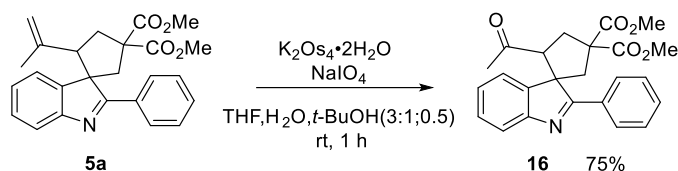

**Scheme S12** **8a** (0.1 mmol), K<sub>2</sub>O<sub>8</sub> · 2H<sub>2</sub>O (0.3 mmol) and NaIO<sub>4</sub> (0.4 mmol) were added into a flask. Then add 1.5 mL solvent (THF:H<sub>2</sub>O:*t*-BuOH = 3:1:0.5) to dissolve substrate and the mixture was stirred for 1 h. The solution was extracted with DCM and repeatedly washed with brine. The organic extracts were dried with Na<sub>2</sub>SO<sub>4</sub>, filtered and concentrated. Crude product was purified by silica gel flash column chromatography to afford product **16** (32 mg).

## 9. Mechanism experiments

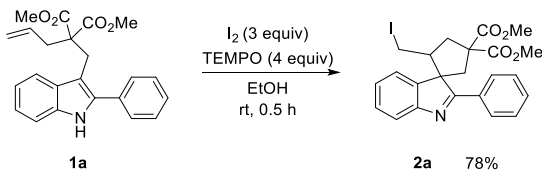

**Scheme S13** **1a** (0.1 mmol), I<sub>2</sub> (0.3 mmol) and TEMPO (0.4 mmol) were added into a flask. Then add 1.5 mL EtOH and the mixture was stirred for 0.5 h. The solution was extracted with ethyl acetate and repeatedly washed with brine (20 mL × 3). The organic extracts were dried with Na<sub>2</sub>SO<sub>4</sub>, filtered and concentrated. Crude product was purified by silica gel flash column chromatography to produce **2a** in 78% yield, and this showed that the reaction did not proceed in the radical way.

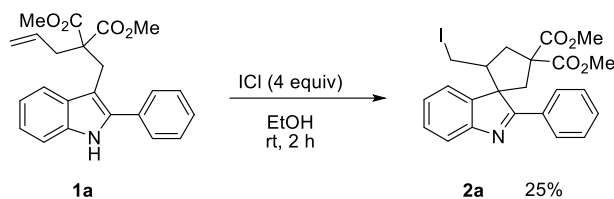

**Scheme S14 1a** (0.1 mmol) and ICl (0.4 mmol) were added into a flask. Then add 1.5 mL EtOH to dissolve substrate and the mixture was stirred for 2 h. The solution was extracted with ethyl acetate and repeatedly washed with brine (20 mL×3). The organic extracts were dried with Na<sub>2</sub>SO<sub>4</sub>, filtered and concentrated. Crude product was purified by silica gel flash column chromatography to produce **2a** with 25%, and this showed that the process of dearomatization combined with an ionic mechanism and I<sup>-</sup> can accelerate the reaction.

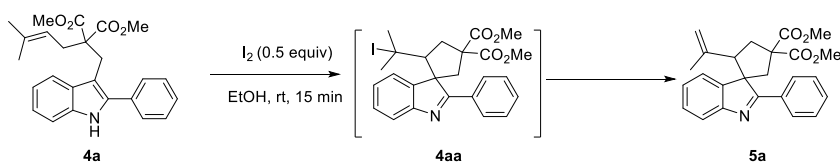

**Scheme S15 4a** (0.1 mmol), and I<sub>2</sub> (0.05 mmol) were added into a flask. Then add 1.5 mL EtOH and the mixture was stirred for 15 min. Then the reaction was quenched by saturated sodium thiosulfate aqueous solution and extracted with ethyl acetate (20 mL×3). The **4aa** was detected by HR-MS (**Figure S1**). HRMS (ESI) (m/z) calculated for C<sub>25</sub>H<sub>27</sub>INO<sub>4</sub> [M+H]<sup>+</sup>: 532.0979, found: 532.0984.

### Qualitative Analysis Report

|                        |                                        |                               |                             |
|------------------------|----------------------------------------|-------------------------------|-----------------------------|
| <b>Data Filename</b>   | ESIH202103202.d                        | <b>Sample Name</b>            | B6-X                        |
| <b>Sample ID</b>       |                                        | <b>Position</b>               | P1-C4                       |
| <b>Instrument Name</b> | Agilent G6520 Q-TOF                    | <b>Acq Method</b>             | 20160322_MS_ESIH_POS_1min.m |
| <b>Acquired Time</b>   | 6/29/2021 19:46:51                     | <b>IRM Calibration Status</b> | Success                     |
| <b>DA Method</b>       | small molecular data analysis method.m | <b>Comment</b>                | ESIH by zhuzhenyun          |

#### User Spectra

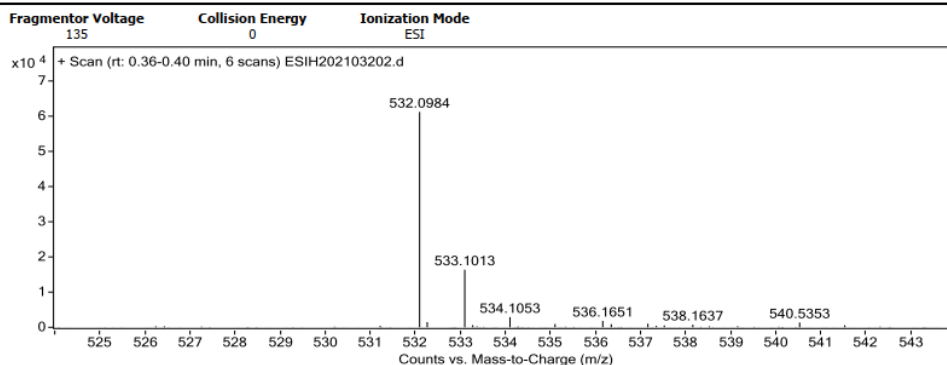

#### Formula Calculator Results

| m/z      | Calc m/z | Diff (mDa) | Diff (ppm) | Ion Formula                                        | Ion                |
|----------|----------|------------|------------|----------------------------------------------------|--------------------|
| 532.0984 | 532.0979 | -0.43      | -0.8       | C <sub>25</sub> H <sub>27</sub> I N O <sub>4</sub> | (M+H) <sup>+</sup> |

--- End Of Report ---

**Figure S1 HR-MS spectrum of 4aa**

## 10. Characterization data of 1a-1x and 4a-4k

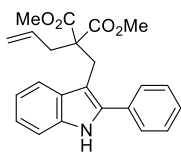

**dimethyl 2-allyl-2-((2-phenyl-1H-indol-3-yl)methyl)malonate (1a).** White solid, Mp: 129.3-131.1°C.  $^1\text{H NMR}$  (400 MHz, Chloroform-*d*)  $\delta$  8.09 (s, 1H), 7.61 – 7.52 (m, 3H), 7.45 (t,  $J = 7.60$  Hz, 2H), 7.40 – 7.29 (m, 2H), 7.21 – 7.12 (m, 1H), 7.11 (td,  $J = 7.53, 7.04, 1.15$  Hz, 1H), 5.40 – 5.28 (m, 1H), 4.85 – 4.73 (m, 2H), 3.71 (s, 2H), 3.41 (s, 6H), 2.35 (d,  $J = 7.28$  Hz, 2H).  $^{13}\text{C NMR}$  (125 MHz, Chloroform-*d*)  $\delta$  171.7, 137.2, 135.8, 133.8, 133.1, 129.8, 129.2, 129.1, 128.2, 122.4, 119.8, 119.7, 118.3, 110.9, 106.7, 59.7, 52.1, 37.2, 27.4. **HRMS (ESI)** (m/z) calculated for  $\text{C}_{23}\text{H}_{27}\text{N}_2\text{O}_4$   $[\text{M}+\text{NH}_4]^+$ : 395.1965, found: 395.1960. The experimental data are in accordance with those reported in the previous literature.<sup>2</sup>

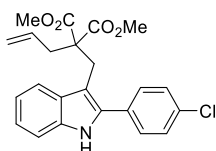

**dimethyl 2-allyl-2-((2-(4-chlorophenyl)-1H-indol-3-yl)methyl)malonate (1b).** White solid, Mp: 148.0-149.0°C.  $^1\text{H NMR}$  (400 MHz, Chloroform-*d*)  $\delta$  8.08 (s, 1H), 7.57 (d,  $J = 7.92$  Hz, 1H), 7.49 – 7.38 (m, 4H), 7.31 (d,  $J = 8.26$  Hz, 1H), 7.18 (td,  $J = 8.04, 7.44, 3.49$  Hz, 1H), 7.12 (td,  $J = 7.55, 7.05, 1.18$  Hz, 1H), 5.46 – 5.31 (m, 1H), 4.90 – 4.77 (m, 2H), 3.68 (s, 2H), 3.43 (s, 6H), 2.35 (dd,  $J = 7.04, 1.41$  Hz, 2H).  $^{13}\text{C NMR}$  (125 MHz, Chloroform-*d*)  $\delta$  171.7, 135.8, 134.2, 132.9, 132.2, 130.4, 129.7, 129.4, 129.3, 122.7, 120.0, 119.8, 118.5, 111.0, 107.3, 59.6, 52.2, 37.3, 27.5. **HRMS (ESI)** (m/z) calculated for  $\text{C}_{23}\text{H}_{26}\text{ClN}_2\text{O}_4$   $[\text{M}+\text{NH}_4]^+$ : 429.1576, found: 429.1574. The experimental data are in accordance with those reported in the previous literature.<sup>2</sup>

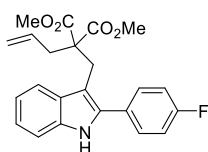

**dimethyl 2-allyl-2-((2-(4-fluorophenyl)-1H-indol-3-yl)methyl)malonate (1c).** White solid, Mp: 116.2-117.3°C.  $^1\text{H NMR}$  (400 MHz, Chloroform-*d*)  $\delta$  8.08 (s, 1H), 7.59 (d,  $J = 7.92$  Hz, 1H), 7.57 – 7.49 (m, 2H), 7.34 (d,  $J = 7.88$  Hz, 1H), 7.24 – 7.09 (m, 4H), 5.44 – 5.29 (m, 1H), 4.92 – 4.77 (m, 2H), 3.69 (s, 2H), 3.47 (s, 6H), 2.37 (d,  $J = 7.14$  Hz, 2H).  $^{13}\text{C NMR}$  (125 MHz, Chloroform-*d*)  $\delta$  171.5, 162.6 (d,  $J = 248.72$  Hz), 136.0, 135.6, 132.7, 130.8 (d,  $J = 8.19$  Hz), 129.7 (d,  $J = 3.39$  Hz), 129.5, 122.4, 119.8, 119.6, 118.3, 116.1 (d,  $J = 21.61$  Hz), 110.8, 106.8, 59.4, 52.1, 37.1, 27.3. **HRMS (ESI)** (m/z) calculated for  $\text{C}_{23}\text{H}_{26}\text{FN}_2\text{O}_4$   $[\text{M}+\text{NH}_4]^+$ : 413.1871, found: 413.1868. The experimental data are in accordance with those reported in the previous literature.<sup>2</sup>

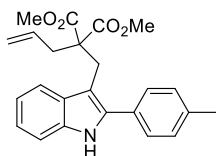

**dimethyl 2-allyl-2-((2-(p-tolyl)-1H-indol-3-yl)methyl)malonate (1d).** White solid, Mp:128.9-129.3°C. **<sup>1</sup>H NMR** (500 MHz, Chloroform-*d*)  $\delta$  8.06 (s, 1H), 7.58 (dd,  $J = 7.9, 1.1$  Hz, 1H), 7.46 – 7.44 (m, 2H), 7.32 (dt,  $J = 8.1, 1.0$  Hz, 1H), 7.28 – 7.25 (m, 2H), 7.17 (ddd,  $J = 8.0, 7.0, 1.2$  Hz, 1H), 7.12 (ddd,  $J = 8.0, 7.0, 1.1$  Hz, 1H), 5.43 – 5.34 (m, 1H), 4.87 – 4.76 (m, 2H), 3.72 (s, 2H), 3.44 (s, 6H), 2.41 (s, 3H), 2.37 (d,  $J = 7.2$  Hz, 2H). **<sup>13</sup>C NMR** (125 MHz, Chloroform-*d*)  $\delta$  171.6, 138.0, 137.2, 135.5, 133.1, 130.7, 129.7, 129.66, 128.8, 122.1, 119.6, 119.4, 118.1, 110.7, 106.3, 59.5, 52.0, 37.1, 27.3, 21.3. **HRMS** (ESI) ( $m/z$ ) calculated for C<sub>24</sub>H<sub>25</sub>NNaO<sub>4</sub> [M+Na]<sup>+</sup>: 414.1676, found: 414.1675.

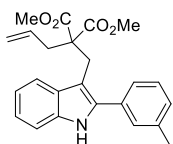

**dimethyl 2-allyl-2-((2-(m-tolyl)-1H-indol-3-yl)methyl)malonate (1e).** White solid. Mp: 123.5-125.4°C. **<sup>1</sup>H NMR** (500 MHz, DMSO-*d*<sub>6</sub>)  $\delta$  11.25 (s, 1H), 7.45 – 7.35 (m, 4H), 7.32 (d,  $J = 8.0$  Hz, 1H), 7.24 – 7.19 (m, 1H), 7.11 – 7.04 (m, 1H), 7.03 – 6.96 (m, 1H), 5.34 – 5.20 (m, 1H), 4.85 – 4.69 (m, 2H), 3.59 (s, 2H), 3.36 (s, 6H), 2.39 (s, 3H), 2.19 (d,  $J = 7.2$  Hz, 2H). **<sup>13</sup>C NMR** (125 MHz, DMSO-*d*<sub>6</sub>)  $\delta$  171.9, 139.0, 138.4, 136.7, 134.4, 133.8, 130.5, 130.0, 129.7, 129.4, 127.1, 122.3, 119.8, 119.7, 119.3, 112.2, 105.6, 59.9, 52.9, 37.5, 27.7, 22.1. **HRMS** (ESI) ( $m/z$ ) calculated for C<sub>24</sub>H<sub>25</sub>NNaO<sub>4</sub> [M+Na]<sup>+</sup>: 414.1676, found: 414.1671.

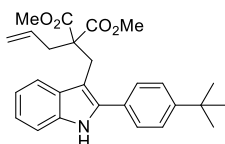

**dimethyl 2-allyl-2-((2-(4-(tert-butyl)phenyl)-1H-indol-3-yl)methyl)malonate (1f).** White solid. Mp: 160.6-161.6°C. **<sup>1</sup>H NMR** (500 MHz, DMSO-*d*<sub>6</sub>)  $\delta$  11.22 (s, 1H), 7.56 – 7.47 (m, 4H), 7.41 (d,  $J = 7.9$  Hz, 1H), 7.32 (dt,  $J = 8.1, 0.9$  Hz, 1H), 7.11 – 7.04 (m, 1H), 6.99 (ddd,  $J = 8.1, 7.0, 1.2$  Hz, 1H), 5.22 – 5.10 (m, 1H), 4.76 – 4.68 (m, 2H), 3.57 (s, 2H), 3.34 (s, 6H), 2.18 (d,  $J = 7.2$  Hz, 2H), 1.33 (s, 9H). **<sup>13</sup>C NMR** (125 MHz, DMSO-*d*<sub>6</sub>)  $\delta$  170.8, 150.4, 137.4, 135.6, 132.7, 130.5, 129.0, 128.7, 125.5, 121.2, 118.7, 118.6, 118.1, 111.1, 104.4, 58.8, 51.9, 36.3, 34.4, 31.0, 26.6. **HRMS** (ESI) ( $m/z$ ) calculated for C<sub>27</sub>H<sub>31</sub>NNaO<sub>4</sub> [M+Na]<sup>+</sup>: 456.2145, found: 456.2158.

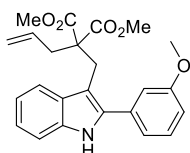

**dimethyl 2-allyl-2-((2-(3-methoxyphenyl)-1H-indol-3-yl)methyl)malonate (1g).** White solid. Mp: 120.7-121.3°C.  $^1\text{H NMR}$  (500 MHz, DMSO- $d_6$ )  $\delta$  11.28 (s, 1H), 7.46 – 7.39 (m, 2H), 7.34 (d,  $J$  = 8.0 Hz, 1H), 7.18 (d,  $J$  = 7.6 Hz, 1H), 7.13 (t,  $J$  = 2.1 Hz, 1H), 7.09 (t,  $J$  = 7.5 Hz, 1H), 7.04 – 6.96 (m, 2H), 5.30 (ddt,  $J$  = 17.3, 10.2, 7.1 Hz, 1H), 4.83 – 4.75 (m, 2H), 3.83 (s, 3H), 3.61 (s, 2H), 3.38 (s, 6H), 2.21 (d,  $J$  = 7.2 Hz, 2H).  $^{13}\text{C NMR}$  (125 MHz, DMSO- $d_6$ )  $\delta$  171.3, 160.0, 137.5, 136.1, 135.2, 133.2, 130.4, 129.4, 121.9, 121.7, 119.3, 119.2, 118.8, 114.9, 113.9, 111.6, 105.3, 59.4, 55.7, 52.4, 37.0, 27.3. **HRMS** (ESI) (m/z) calculated for  $\text{C}_{24}\text{H}_{25}\text{NNaO}_5$  [ $\text{M}+\text{Na}$ ] $^+$ : 430.1625, found: 430.1634.

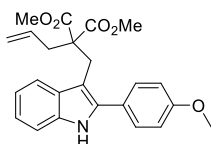

**dimethyl 2-allyl-2-((2-(4-methoxyphenyl)-1H-indol-3-yl)methyl)malonate (1h).** White solid. Mp: 154.1-155.3°C.  $^1\text{H NMR}$  (500 MHz, Chloroform- $d$ )  $\delta$  8.05 (s, 1H), 7.57 (dd,  $J$  = 7.9, 1.1 Hz, 1H), 7.49 – 7.44 (m, 2H), 7.31 (dt,  $J$  = 8.0, 1.0 Hz, 1H), 7.16 (ddd,  $J$  = 8.1, 7.0, 1.2 Hz, 1H), 7.11 (ddd,  $J$  = 8.0, 7.0, 1.1 Hz, 1H), 7.01 – 6.96 (m, 2H), 5.45 – 5.33 (m, 1H), 4.89 – 4.77 (m, 2H), 3.86 (s, 3H), 3.70 (s, 2H), 3.46 (s, 6H), 2.38 (dt,  $J$  = 7.1, 1.3 Hz, 2H).  $^{13}\text{C NMR}$  (125 MHz, Chloroform- $d$ )  $\delta$  171.7, 159.5, 137.0, 135.5, 133.0, 130.2, 129.7, 126.0, 122.0, 119.6, 119.4, 118.1, 114.5, 110.7, 106.0, 59.5, 55.4, 52.0, 37.1, 27.3. **HRMS** (ESI) (m/z) calculated for  $\text{C}_{24}\text{H}_{25}\text{NNaO}_5$  [ $\text{M}+\text{Na}$ ] $^+$ : 430.1625, found: 430.1626.

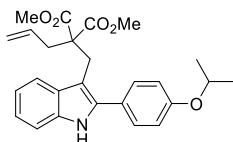

**dimethyl 2-allyl-2-((2-(4-isopropoxyphenyl)-1H-indol-3-yl)methyl)malonate (1i).** White solid. Mp: 137.4-139.2°C.  $^1\text{H NMR}$  (500 MHz, DMSO- $d_6$ )  $\delta$  11.17 (s, 1H), 7.50 – 7.45 (m, 2H), 7.38 (d,  $J$  = 7.96 Hz, 1H), 7.30 (d,  $J$  = 8.00 Hz, 1H), 7.09 – 7.03 (m, 3H), 7.01 – 6.95 (m, 1H), 5.29 – 5.18 (m, 1H), 4.81 – 4.73 (m, 2H), 4.73 – 4.65 (m, 1H), 3.55 (s, 2H), 3.38 (s, 6H), 2.19 (d,  $J$  = 7.23 Hz, 2H), 1.29 (d,  $J$  = 5.98 Hz, 6H).  $^{13}\text{C NMR}$  (125 MHz, DMSO- $d_6$ )  $\delta$  171.3, 157.6, 137.9, 136.0, 133.3, 130.8, 129.4, 126.0, 121.5, 119.1, 119.0, 118.7, 116.6, 111.5, 104.5, 69.8, 59.4, 52.4, 36.9, 27.2, 22.2. **HRMS** (ESI) (m/z) calculated for  $\text{C}_{26}\text{H}_{30}\text{NO}_5$  [ $\text{M}+\text{H}$ ] $^+$ : 436.2118, found: 436.2123.

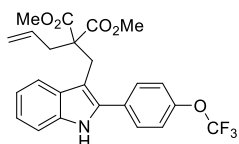

**dimethyl 2-allyl-2-((2-(4-(trifluoromethoxy)phenyl)-1H-indol-3-yl)methyl)malonate (1j).** White solid. Mp: 136.3-137.1°C. <sup>1</sup>H NMR (500 MHz, DMSO-*d*<sub>6</sub>) δ 11.38 (s, 1H), 7.77 – 7.70 (m, 2H), 7.55 – 7.48 (m, 2H), 7.44 (d, *J* = 8.0 Hz, 1H), 7.35 (dt, *J* = 8.1, 0.9 Hz, 1H), 7.11 (ddd, *J* = 8.1, 7.0, 1.2 Hz, 1H), 7.02 (ddd, *J* = 8.1, 7.0, 1.1 Hz, 1H), 5.34 – 5.07 (m, 1H), 4.84 – 4.69 (m, 2H), 3.58 (s, 2H), 3.36 (s, 6H), 2.19 (d, *J* = 7.1 Hz, 2H). <sup>13</sup>C NMR (125 MHz, DMSO-*d*<sub>6</sub>) δ 170.8, 147.8, 135.8, 132.9, 132.5, 131.0, 128.8, 121.6 (d, *J* = 5.96 Hz), 121.2, 119.1, 118.9, 118.3, 111.3, 105.3, 58.8, 51.9, 36.4, 26.6. HRMS (ESI) (*m/z*) calculated for C<sub>24</sub>H<sub>22</sub>F<sub>3</sub>NNaO<sub>5</sub> [M+Na]<sup>+</sup>: 484.1342, found: 484.135.

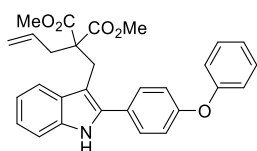

**dimethyl 2-allyl-2-((2-(4-phenoxyphenyl)-1H-indol-3-yl)methyl)malonate (1k).** White solid. Mp: 142.3-143.4°C. <sup>1</sup>H NMR (600 MHz, DMSO-*d*<sub>6</sub>) δ 11.31 (s, 1H), 7.65 – 7.60 (m, 2H), 7.48 – 7.40 (m, 3H), 7.34 (dt, *J* = 8.0, 0.9 Hz, 1H), 7.22 – 7.15 (m, 3H), 7.12 – 7.05 (m, 3H), 7.01 (td, *J* = 7.50, 6.95, 1.07 Hz, 1H), 5.32 – 5.22 (m, 1H), 4.90 – 4.79 (m, 2H), 3.58 (s, 2H), 3.42 (s, 6H), 2.22 (d, *J* = 7.2 Hz, 2H). <sup>13</sup>C NMR (150 MHz, DMSO-*d*<sub>6</sub>) δ 171.3, 157.1, 156.8, 137.2, 136.1, 133.2, 131.3, 130.6, 129.3, 129.2, 124.1, 121.7, 119.6, 119.2, 119.1, 119.0, 118.9, 111.6, 105.0, 59.4, 52.5, 36.8, 27.0. HRMS (ESI) (*m/z*) calculated for C<sub>29</sub>H<sub>28</sub>NO<sub>5</sub> [M+H]<sup>+</sup>: 470.1962, found: 470.1964.

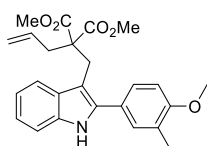

**dimethyl 2-allyl-2-((2-(4-methoxy-3-methylphenyl)-1H-indol-3-yl)methyl)malonate (1l).** White solid. Mp: 113.9-114.8°C. <sup>1</sup>H NMR (600 MHz, DMSO-*d*<sub>6</sub>) δ 11.16 (s, 1H), 7.41 – 7.35 (m, 3H), 7.31 (d, *J* = 8.1 Hz, 1H), 7.05 (t, *J* = 8.5 Hz, 2H), 6.98 (t, *J* = 7.5 Hz, 1H), 5.34 – 5.23 (m, 1H), 4.84 – 4.72 (m, 2H), 3.84 (s, 3H), 3.57 (s, 2H), 3.38 (s, 6H), 2.22 (s, 3H), 2.20 (d, *J* = 7.2 Hz, 2H). <sup>13</sup>C NMR (150 MHz, DMSO-*d*<sub>6</sub>) δ 171.4, 157.5, 137.9, 136.0, 133.3, 131.4, 129.5, 128.2, 126.4, 125.8, 121.4, 119.0, 119.0, 118.8, 111.5, 111.0, 104.4, 59.4, 55.9, 52.4, 36.9, 27.2, 16.6. HRMS (ESI) (*m/z*) calculated for C<sub>25</sub>H<sub>27</sub>NNaO<sub>5</sub> [M+Na]<sup>+</sup>: 444.1781, found: 444.1775.

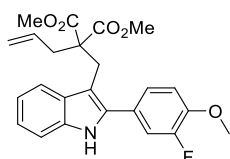

**dimethyl 2-allyl-2-((2-(3-fluoro-4-methoxyphenyl)-1H-indol-3-yl)methyl)malonate (1m).** White solid. Mp: 152.4-153.6°C. <sup>1</sup>H NMR (600 MHz, Chloroform-*d*) δ 8.15 (s, 1H), 7.55 (d, *J* = 8.0 Hz, 1H), 7.29 (dd, *J* = 8.7, 1.9 Hz, 1H), 7.26 – 7.23 (m, 1H), 7.20 (dt, *J* = 8.2, 4.3 Hz, 1H), 7.18 – 7.14 (m, 1H), 7.10 (t, *J* = 7.5 Hz, 1H), 6.97 (q, *J* = 8.4, 7.9 Hz, 1H), 5.45 – 5.32 (m, 1H), 4.90 – 4.78 (m, 2H), 3.91 (d, *J* = 2.1 Hz, 3H), 3.67 (s, 2H), 3.46 (d, *J* = 1.1 Hz, 6H), 2.36 (d, *J* = 7.80 Hz, 2H). <sup>13</sup>C NMR (150 MHz, Chloroform-*d*) δ 171.6, 152.4 (d, *J* = 247.20 Hz), 147.6 (d, *J* = 10.47 Hz), 135.6 (d, *J* = 23.13 Hz), 132.8, 129.5, 126.5 (d, *J* = 6.85 Hz), 125.0 (d, *J* = 3.45 Hz), 122.3, 119.8, 119.5, 118.3, 116.6 (d, *J* = 18.97 Hz), 113.8, 110.8, 106.6, 59.5, 56.4, 52.1, 37.1, 27.3. **HRMS** (ESI) (*m/z*) calculated for C<sub>24</sub>H<sub>23</sub>FNO<sub>5</sub> [M-H]<sup>-</sup>:424.1566, found: 424.1564.

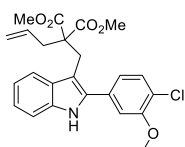

**dimethyl 2-allyl-2-((2-(4-chloro-3-methoxyphenyl)-1H-indol-3-yl)methyl)malonate (1n).** White solid. Mp: 147.3-148.1°C. <sup>1</sup>H NMR (600 MHz, Chloroform-*d*) δ 8.23 (s, 1H), 7.56 (dd, *J* = 8.1, 1.1 Hz, 1H), 7.39 (d, *J* = 8.0 Hz, 1H), 7.32 – 7.28 (m, 1H), 7.18 (ddd, *J* = 8.1, 7.0, 1.2 Hz, 1H), 7.12 (ddd, *J* = 8.1, 7.0, 1.1 Hz, 1H), 7.08 (d, *J* = 1.9 Hz, 1H), 7.29 (d, *J* = 7.94 Hz, 1H), 5.38 (ddt, *J* = 17.2, 10.2, 7.1 Hz, 1H), 4.94 – 4.75 (m, 2H), 3.91 (s, 3H), 3.68 (s, 2H), 3.45 (s, 6H), 2.36 (dt, *J* = 7.1, 1.4 Hz, 2H). <sup>13</sup>C NMR (150 MHz, Chloroform-*d*) δ 171.6, 155.3, 136.0, 135.6, 133.4, 132.65, 130.7, 129.5, 122.6, 122.4, 121.8, 119.8, 119.6, 118.4, 112.7, 110.9, 107.0, 59.4, 56.4, 52.1, 37.1, 27.4. **HRMS** (ESI) (*m/z*) calculated for C<sub>24</sub>H<sub>23</sub>ClNO<sub>5</sub> [M-H]<sup>-</sup>:440.1270, found: 440.1274.

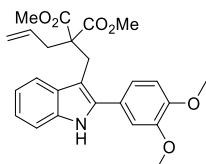

**dimethyl 2-allyl-2-((2-(3,4-dimethoxyphenyl)-1H-indol-3-yl)methyl)malonate (1o).** White solid. Mp: 157.3-158.7°C. <sup>1</sup>H NMR (600 MHz, DMSO-*d*<sub>6</sub>) δ 11.19 (s, 1H), 7.39 (d, *J* = 8.0 Hz, 1H), 7.32 (d, *J* = 8.0 Hz, 1H), 7.16 – 7.11 (m, 2H), 7.07 (dd, *J* = 16.0, 8.1 Hz, 2H), 6.98 (t, *J* = 7.5 Hz, 1H), 5.42 – 5.18 (m, 1H), 4.83 – 4.70 (m, 2H), 3.81 (d, *J* = 8.9 Hz, 6H), 3.59 (s, 2H), 3.39 (s, 6H), 2.21 (d, *J* = 7.2 Hz, 2H). <sup>13</sup>C NMR (150 MHz, DMSO-*d*<sub>6</sub>) δ 171.4, 137.9, 135.9, 133.3, 129.5, 126.4, 121.9, 121.6, 119.1, 119.0, 118.8, 113.1, 112.6, 111.5, 104.6, 59.4, 56.2, 56.1, 52.4, 37.0, 27.4. **HRMS** (ESI) (*m/z*) calculated for C<sub>25</sub>H<sub>28</sub>NO<sub>6</sub> [M+H]<sup>+</sup>: 438.1911, found: 439.1918.

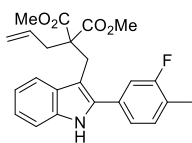



**dimethyl 2-allyl-2-((2-(3-fluoro-4-methylphenyl)-1H-indol-3-yl)methyl)malonate (1p).** Colorless oil.  $^1\text{H NMR}$  (600 MHz, DMSO- $d_6$ )  $\delta$  11.31 (s, 1H), 7.42 (dd,  $J = 10.23, 7.99$  Hz, 2H), 7.38 – 7.32 (m, 3H), 7.12 – 7.07 (m, 1H), 7.03 – 6.98 (m, 1H), 5.39 – 5.29 (m, 1H), 4.87 – 4.75 (m, 2H), 3.59 (s, 2H), 3.37 (s, 6H), 2.30 (d,  $J = 1.7$  Hz, 3H), 2.21 (d,  $J = 7.2$  Hz, 2H).  $^{13}\text{C NMR}$  (150 MHz, DMSO- $d_6$ )  $\delta$  171.3, 161.1 (d,  $J = 243.20$  Hz), 136.3, 136.1, 133.4 (d,  $J = 8.24$  Hz), 133.1, 132.4 (d,  $J = 5.34$  Hz), 129.4, 125.2, 124.2 (d,  $J = 17.05$  Hz), 122.0, 119.3 (d,  $J = 6.62$  Hz), 118.9, 115.6 (d,  $J = 22.89$  Hz), 111.7, 105.6, 59.3, 52.4, 37.0, 27.3, 14.4 (d,  $J = 3.00$  Hz). **HRMS** (ESI) (m/z) calculated for  $\text{C}_{24}\text{H}_{24}\text{FNNO}_4$   $[\text{M}+\text{Na}]^+$ : 432.1582, found: 432.1589.

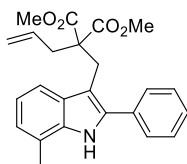

**dimethyl 2-allyl-2-((7-methyl-2-phenyl-1H-indol-3-yl)methyl)malonate (1q).** White solid. Mp: 121.3-122.5°C.  $^1\text{H NMR}$  (500 MHz, Chloroform- $d$ )  $\delta$  7.97 (s, 1H), 7.62 – 7.57 (m, 2H), 7.51 – 7.47 (m, 2H), 7.45 – 7.38 (m, 2H), 7.05 (dd,  $J = 8.0, 7.1$  Hz, 1H), 6.99 (dt,  $J = 7.0, 1.0$  Hz, 1H), 5.39 – 5.29 (m, 1H), 4.87 – 4.73 (m, 2H), 3.72 (s, 2H), 3.44 (s, 6H), 2.49 (s, 3H), 2.37 (dt,  $J = 7.2, 1.3$  Hz, 2H).  $^{13}\text{C NMR}$  (125 MHz, Chloroform- $d$ )  $\delta$  171.6, 136.9, 135.2, 133.9, 133.0, 129.2, 129.1, 129.0, 128.1, 122.8, 119.9, 119.9, 118.1, 117.3, 107.1, 59.5, 52.0, 37.0, 27.4, 16.5. **HRMS** (ESI) (m/z) calculated for  $\text{C}_{24}\text{H}_{25}\text{NNO}_4$   $[\text{M}+\text{Na}]^+$ : 414.1676, found: 414.1672.

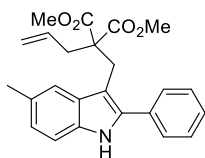

**dimethyl 2-allyl-2-((5-methyl-2-phenyl-1H-indol-3-yl)methyl)malonate (1r).** White solid. Mp: 142.7-143.3°C.  $^1\text{H NMR}$  (500 MHz, DMSO- $d_6$ )  $\delta$  11.14 (s, 1H), 7.59 – 7.54 (m, 2H), 7.49 (t,  $J = 7.7$  Hz, 2H), 7.41 – 7.36 (m, 1H), 7.23 – 7.16 (m, 2H), 6.91 (dd,  $J = 8.3, 1.6$  Hz, 1H), 5.22 – 5.10 (m, 1H), 4.78 – 4.67 (m, 2H), 3.55 (s, 2H), 3.38 (s, 6H), 2.37 (s, 3H), 2.15 (d,  $J = 7.2$  Hz, 2H).  $^{13}\text{C NMR}$  (125 MHz, DMSO- $d_6$ )  $\delta$  170.8, 137.4, 134.0, 133.6, 132.6, 129.1, 129.0, 128.8, 127.7, 127.0, 122.9, 118.4, 118.3, 110.9, 104.1, 58.8, 51.9, 36.3, 26.7, 21.3. **HRMS** (ESI) (m/z) calculated for  $\text{C}_{24}\text{H}_{25}\text{NNO}_4$   $[\text{M}+\text{Na}]^+$ : 414.1676, found: 414.1677.

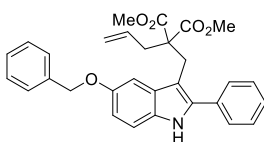

**dimethyl 2-allyl-2-((5-(benzyloxy)-2-phenyl-1H-indol-3-yl)methyl)malonate (1s).** White solid. Mp: 98.2-100°C.  $^1\text{H NMR}$  (500 MHz, DMSO- $d_6$ )  $\delta$  11.13 (s, 1H), 7.57 (d,  $J = 8.2$  Hz, 2H), 7.53 – 7.45 (m, 4H), 7.42 – 7.37 (m, 3H),

7.35 – 7.30 (m, 1H), 7.23 (d,  $J = 8.7$  Hz, 1H), 7.03 (d,  $J = 2.4$  Hz, 1H), 6.83 (dd,  $J = 8.6, 2.3$  Hz, 1H), 5.32 (ddt,  $J = 17.2, 10.1, 7.1$  Hz, 1H), 5.09 (s, 2H), 4.86 – 4.72 (m, 2H), 3.56 (s, 2H), 3.33 (d,  $J = 1.3$  Hz, 6H), 2.21 (d,  $J = 7.1$  Hz, 2H).  $^{13}\text{C NMR}$  (125 MHz, DMSO- $d_6$ )  $\delta$  171.3, 152.7, 138.5, 138.2, 134.0, 133.3, 131.6, 129.91, 129.3, 129.2, 128.8, 128.2, 128.1, 128.0, 118.8, 112.5, 112.3, 105.0, 103.2, 70.4, 59.3, 52.3, 36.9, 26.8. **HRMS** (ESI) ( $m/z$ ) calculated for  $\text{C}_{30}\text{H}_{30}\text{NO}_5$   $[\text{M}+\text{H}]^+$ : 484.2118, found: 484.2122.

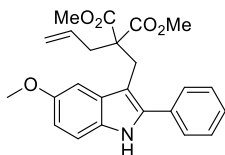

**dimethyl 2-allyl-2-((5-methoxy-2-phenyl-1H-indol-3-yl)methyl)malonate (1t)**. White solid. Mp: 150.3-151.4°C.  $^1\text{H NMR}$  (500 MHz, Chloroform- $d$ )  $\delta$  8.00 (s, 1H), 7.57 – 7.53 (m, 2H), 7.48 – 7.43 (m, 2H), 7.40 – 7.35 (m, 1H), 7.22 (d,  $J = 8.67$  Hz, 1H), 7.07 (d,  $J = 2.5$  Hz, 1H), 6.84 (dd,  $J = 8.7, 2.4$  Hz, 1H), 5.40 (ddt,  $J = 17.3, 10.2, 7.1$  Hz, 1H), 4.88 – 4.76 (m, 2H), 3.88 (s, 3H), 3.70 (s, 2H), 3.42 (s, 6H), 2.38 (dt,  $J = 7.1, 1.3$  Hz, 2H).  $^{13}\text{C NMR}$  (125 MHz, Chloroform- $d$ )  $\delta$  171.7, 154.1, 137.9, 133.7, 132.9, 130.8, 130.2, 129.0, 128.9, 128.0, 118.2, 112.4, 111.5, 106.4, 101.6, 59.5, 55.9, 52.0, 36.9, 27.3. **HRMS** (ESI) ( $m/z$ ) calculated for  $\text{C}_{24}\text{H}_{25}\text{NNaO}_5$   $[\text{M}+\text{Na}]^+$ : 430.1625, found: 430.1621.

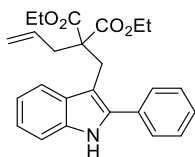

**diethyl 2-allyl-2-((2-phenyl-1H-indol-3-yl)methyl)malonate (1u)**. White solid. Mp: 119.3-120.5°C.  $^1\text{H NMR}$  (500 MHz, DMSO- $d_6$ )  $\delta$  11.26 (d,  $J = 6.1$  Hz, 1H), 7.60 – 7.55 (m, 2H), 7.50 (t,  $J = 7.7$  Hz, 2H), 7.45 – 7.37 (m, 2H), 7.32 (dq,  $J = 8.1, 1.2$  Hz, 1H), 7.10 – 7.05 (m, 1H), 7.01 – 6.95 (m, 1H), 5.29 – 5.19 (m, 1H), 4.82 – 4.67 (m, 2H), 3.94 – 3.83 (m, 2H), 3.78 – 3.64 (m, 2H), 3.56 (s, 2H), 2.18 (d,  $J = 7.1$  Hz, 2H), 1.00 (t,  $J = 7.1$  Hz, 6H).  $^{13}\text{C NMR}$  (125 MHz, DMSO- $d_6$ )  $\delta$  170.3, 137.3, 135.7, 133.5, 132.6, 129.0, 128.8, 127.7, 121.3, 118.8, 118.6, 118.3, 111.1, 104.9, 60.5, 58.5, 36.3, 26.4, 13.6. **HRMS** (ESI) ( $m/z$ ) calculated for  $\text{C}_{25}\text{H}_{27}\text{NNaO}_4$   $[\text{M}+\text{Na}]^+$ : 428.1832, found: 428.1829.

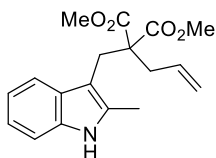

**dimethyl 2-allyl-2-((2-methyl-1H-indol-3-yl)methyl)malonate (1v)**. White solid. Mp: 106.4-107.2°C.  $^1\text{H NMR}$  (600 MHz, Chloroform- $d$ )  $\delta$  7.87 (s, 1H), 7.46 – 7.41 (m, 1H), 7.22 (dt,  $J = 8.0, 1.0$  Hz, 1H), 7.11 – 7.05 (m, 1H), 7.06 – 7.03 (m, 1H), 5.95 – 5.87 (m, 1H), 5.17 – 5.09 (m, 2H), 3.64 (s, 6H), 3.42 (s, 2H), 2.66 (dt,  $J = 7.1, 1.3$  Hz, 2H), 2.34 (s, 3H).  $^{13}\text{C NMR}$  (150 MHz, Chloroform- $d$ )  $\delta$  171.4, 134.7, 132.9, 132.9, 128.8, 120.6, 118.8, 118.2,

118.1, 109.7, 105.5, 59.2, 51.8, 37.5, 28.2, 11.9. **HRMS** (ESI) (m/z) calculated for  $C_{18}H_{21}NNaO_4$   $[M+Na]^+$ : 338.1363, found: 338.135.

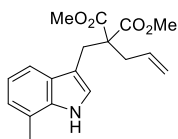

**dimethyl 2-allyl-2-((7-methyl-1H-indol-3-yl)methyl)malonate (1w)**. White solid. Mp: 89.8-91.5°C.  **$^1H$  NMR** (600 MHz, Chloroform-*d*)  $\delta$  8.05 (s, 1H), 7.39 (d,  $J$  = 8.0 Hz, 1H), 7.02 (dd,  $J$  = 8.0, 7.1 Hz, 1H), 6.98 – 6.94 (m, 2H), 5.87 – 5.77 (m, 1H), 5.17 – 5.09 (m, 2H), 3.67 (s, 6H), 3.42 (s, 2H), 2.68 (dt,  $J$  = 7.3, 1.3 Hz, 2H), 2.40 (s, 3H).  **$^{13}C$  NMR** (150 MHz, Chloroform-*d*)  $\delta$  170.8, 134.5, 132.1, 126.7, 122.1, 121.6, 119.4, 118.7, 118.2, 115.7, 109.4, 58.2, 51.5, 36.5, 27.4, 15.6. **HRMS** (ESI) (m/z) calculated for  $C_{18}H_{22}NO_4$   $[M+H]^+$ : 316.1543, found: 316.1550.

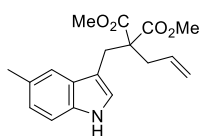

**dimethyl 2-allyl-2-((5-methyl-1H-indol-3-yl)methyl)malonate (1x)**. White solid. Mp: 98.2-99.4°C.  **$^1H$  NMR** (500 MHz, Chloroform-*d*)  $\delta$  8.01 (s, 1H), 7.36 – 7.34 (m, 1H), 7.23 (d,  $J$  = 8.2 Hz, 1H), 7.01 (dd,  $J$  = 8.3, 1.6 Hz, 1H), 6.96 (d,  $J$  = 1.5 Hz, 1H), 5.90 – 5.79 (m, 1H), 5.20 – 5.13 (m, 2H), 3.70 (s, 6H), 3.43 (d,  $J$  = 0.8 Hz, 2H), 2.71 (dt,  $J$  = 7.3, 1.3 Hz, 2H), 2.47 (s, 3H).  **$^{13}C$  NMR** (125 MHz, Chloroform-*d*)  $\delta$  171.7, 134.1, 133.0, 128.5, 128.3, 123.6, 123.3, 119.0, 118.5, 110.7, 109.4, 59.1, 52.3, 37.3, 28.2, 21.5. **HRMS** (ESI) (m/z) calculated for  $C_{18}H_{22}NO_4$   $[M+H]^+$ : 316.1543, found: 316.1540.

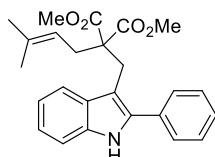

**dimethyl 2-(3-methylbut-2-en-1-yl)-2-((2-phenyl-1H-indol-3-yl)methyl)malonate (4a)**. White solid. Mp: 132.0-133.1°C.  **$^1H$  NMR** (600 MHz, DMSO-*d*<sub>6</sub>)  $\delta$  11.29 (s, 1H), 7.62 – 7.57 (m, 2H), 7.54 – 7.49 (m, 2H), 7.43 – 7.38 (m, 2H), 7.34 (dt,  $J$  = 8.0, 0.9 Hz, 1H), 7.12 – 7.06 (m, 1H), 7.03 – 6.97 (m, 1H), 4.60 – 4.51 (m, 1H), 3.61 (s, 2H), 3.38 (s, 6H), 2.13 (d,  $J$  = 7.1 Hz, 2H), 1.46 (d,  $J$  = 1.7 Hz, 3H), 1.30 (d,  $J$  = 1.4 Hz, 3H).  **$^{13}C$  NMR** (150 MHz, DMSO-*d*<sub>6</sub>)  $\delta$  171.7, 137.8, 136.1, 134.4, 133.9, 129.4, 129.4, 129.2, 128.1, 121.7, 119.1, 118.4, 111.6, 105.2, 58.8, 52.4, 30.7, 27.2, 26.1, 17.8. **HRMS** (ESI) (m/z) calculated for  $C_{25}H_{27}NNaO_4$   $[M+Na]^+$ : 428.1832, found: 428.1841.

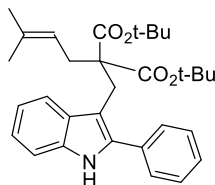

**di-tert-butyl 2-(3-methylbut-2-en-1-yl)-2-((2-phenyl-1H-indol-3-yl)methyl)malonate (4b).** White solid. Mp: 125.0-126.1°C. <sup>1</sup>H NMR (400 MHz, Chloroform-*d*) δ 8.05 (s, 1H), 7.81 (d, *J* = 7.9 Hz, 1H), 7.59 (d, *J* = 7.6 Hz, 2H), 7.46 (t, *J* = 7.5 Hz, 2H), 7.35 (dd, *J* = 21.7, 7.7 Hz, 2H), 7.17 (t, *J* = 7.5 Hz, 1H), 7.10 (t, *J* = 7.5 Hz, 1H), 4.81 (t, *J* = 6.9 Hz, 1H), 3.60 (s, 2H), 2.39 (d, *J* = 6.9 Hz, 2H), 1.53 (s, 3H), 1.42 (s, 3H), 1.27 (s, 18H). <sup>13</sup>C NMR (100 MHz, Chloroform-*d*) δ 171.2, 136.7, 135.6, 133.7, 133.5, 130.0, 128.9, 128.8, 127.8, 122.0, 121.3, 119.4, 118.9, 110.3, 108.7, 59.6, 33.2, 27.7, 27.2, 25.8, 17.9. HRMS (ESI) (*m/z*) calculated for C<sub>31</sub>H<sub>39</sub>NNaO<sub>4</sub> [M+Na]<sup>+</sup>: 512.2771, found: 512.2771.

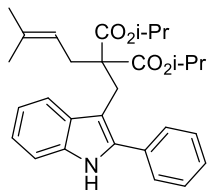

**diisopropyl 2-(3-methylbut-2-en-1-yl)-2-((2-phenyl-1H-indol-3-yl)methyl)malonate (4c).** Colorless oil. <sup>1</sup>H NMR (400 MHz, Chloroform-*d*) δ 8.19 (s, 1H), 7.64 (d, *J* = 8.04 Hz, 1H), 7.59 – 7.52 (m, 2H), 7.44 (t, *J* = 7.47 Hz, 2H), 7.41 – 7.32 (m, 1H), 7.30 (t, *J* = 6.96 Hz, 1H), 7.17 (t, *J* = 6.94 Hz, 1H), 7.09 (t, *J* = 7.38 Hz, 1H), 4.80 (p, *J* = 6.23 Hz, 2H), 4.71 – 4.62 (m, 1H), 3.71 (s, 2H), 2.31 (d, *J* = 6.77 Hz, 2H), 1.47 (d, *J* = 1.64 Hz, 3H), 1.35 (s, 3H), 1.14 (d, *J* = 6.25 Hz, 6H), 1.05 (d, *J* = 6.24 Hz, 6H). <sup>13</sup>C NMR (100 MHz, Chloroform-*d*) δ 171.5, 137.2, 135.6, 133.7, 133.6, 129.7, 129.0, 128.8, 127.9, 122.0, 119.9, 119.3, 118.5, 110.6, 107.4, 68.7, 58.6, 31.3, 27.3, 25.8, 21.5, 21.4, 21.3, 17.9. HRMS (ESI) (*m/z*) calculated for C<sub>29</sub>H<sub>36</sub>NO<sub>4</sub> [M+H]<sup>+</sup>: 462.2639, found: 462.2633.

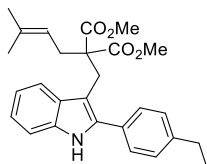

**dimethyl 2-((2-(4-ethylphenyl)-1H-indol-3-yl)methyl)-2-(3-methylbut-2-en-1-yl)malonate (4d).** White solid. Mp: 122.3-123.1°C. <sup>1</sup>H NMR (500 MHz, Chloroform-*d*) δ 8.13 (s, 1H), 7.54 (d, *J* = 7.9 Hz, 1H), 7.41 (d, *J* = 7.9 Hz, 2H), 7.28 – 7.22 (m, 1H), 7.21 (d, *J* = 7.9 Hz, 2H), 7.15 – 7.08 (m, 1H), 7.06 (td, *J* = 7.5, 1.1 Hz, 1H), 4.68 (tt, *J* = 6.9, 1.6 Hz, 1H), 3.70 (s, 2H), 3.39 (s, 6H), 2.66 (q, *J* = 7.6 Hz, 2H), 2.30 (d, *J* = 6.9 Hz, 2H), 1.51 (d, *J* = 1.5 Hz, 3H), 1.34 (d, *J* = 1.4 Hz, 3H), 1.24 (t, *J* = 7.6 Hz, 3H). <sup>13</sup>C NMR (125 MHz, Chloroform-*d*) δ 171.6, 143.6, 136.7, 135.1, 134.1, 130.5, 129.3, 128.4, 127.9, 121.4, 119.0, 118.9, 117.8, 110.2, 105.8, 58.5, 51.5, 30.3, 28.2, 26.6, 25.4, 17.2, 15.1. HRMS (ESI) (*m/z*) calculated for C<sub>27</sub>H<sub>32</sub>NO<sub>4</sub> [M+H]<sup>+</sup>: 434.2326, found: 434.2327.

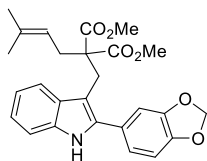

**dimethyl 2-((2-(benzo[d][1,3]dioxol-5-yl)-1H-indol-3-yl)methyl)-2-(3-methylbut-2-en-1-yl)malonate (4e).**

White solid. Mp: 114.3-115.6°C. <sup>1</sup>H NMR (500 MHz, Chloroform-*d*) δ 8.02 (s, 1H), 7.52 (d, *J* = 8.0 Hz, 1H), 7.29 (d, *J* = 8.03 Hz, 1H), 7.14 (ddd, *J* = 8.0, 6.9, 1.2 Hz, 1H), 7.07 (ddd, *J* = 8.0, 7.0, 1.1 Hz, 1H), 7.00 (dd, *J* = 6.0, 1.9 Hz, 2H), 6.87 (d, *J* = 8.4 Hz, 1H), 5.99 (s, 2H), 4.68 (tt, *J* = 6.7, 1.5 Hz, 1H), 3.66 (s, 2H), 3.48 (s, 6H), 2.31 (d, *J* = 6.8 Hz, 2H), 1.54 (d, *J* = 1.6 Hz, 3H), 1.38 (d, *J* = 1.4 Hz, 3H). <sup>13</sup>C NMR (125 MHz, Chloroform-*d*) δ 172.1, 148.0, 147.5, 136.8, 135.4, 134.5, 129.6, 127.5, 122.8, 122.1, 119.6, 119.4, 118.1, 110.6, 109.5, 108.8, 106.5, 101.3, 58.9, 52.1, 30.7, 27.0, 25.8, 17.7. HRMS (ESI) (*m/z*) calculated for C<sub>26</sub>H<sub>28</sub>NO<sub>6</sub> [M+H]<sup>+</sup>: 450.1911, found: 450.1927.

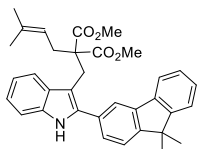

**dimethyl 2-((2-(9,9-dimethyl-9H-fluoren-3-yl)-1H-indol-3-yl)methyl)-2-(3-methylbut-2-en-1-yl)malonate (4f).**

White solid. Mp: 199.2-200.3°C. <sup>1</sup>H NMR (400 MHz, Chloroform-*d*) δ 8.18 (s, 1H), 7.84 – 7.74 (m, 2H), 7.65 (d, *J* = 1.5 Hz, 1H), 7.63 – 7.53 (m, 2H), 7.49 (dd, *J* = 6.8, 1.8 Hz, 1H), 7.44 – 7.33 (m, 3H), 7.19 (ddd, *J* = 8.1, 7.0, 1.2 Hz, 1H), 7.12 (ddd, *J* = 8.1, 7.0, 1.1 Hz, 1H), 4.74 – 4.66 (m, 1H), 3.79 (s, 2H), 3.41 (s, 6H), 2.35 (d, *J* = 6.9 Hz, 2H), 1.55 (s, 6H), 1.42 (d, *J* = 1.6 Hz, 3H), 1.32 (d, *J* = 1.4 Hz, 3H). <sup>13</sup>C NMR (100 MHz, Chloroform-*d*) δ 172.0, 154.3, 153.9, 139.1, 138.6, 137.5, 135.6, 134.6, 132.5, 129.9, 128.0, 127.6, 127.1, 123.1, 122.7, 122.1, 120.4, 120.2, 119.6, 119.5, 118.1, 110.7, 106.8, 59.0, 52.0, 47.0, 30.9, 27.2, 27.1, 25.8, 17.7. HRMS (ESI) (*m/z*) calculated for C<sub>34</sub>H<sub>36</sub>NO<sub>4</sub> [M+H]<sup>+</sup>: 522.2639, found: 522.2639.

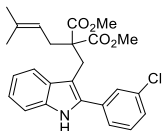

**dimethyl 2-((2-(3-chlorophenyl)-1H-indol-3-yl)methyl)-2-(3-methylbut-2-en-1-yl)malonate (4g).**

White solid. Mp: 149.6-150.5°C. <sup>1</sup>H NMR (600 MHz, Chloroform-*d*) δ 8.11 (s, 1H), 7.58 – 7.52 (m, 2H), 7.43 (dt, *J* = 7.5, 1.5 Hz, 1H), 7.39 – 7.28 (m, 3H), 7.20 – 7.14 (m, 1H), 7.09 (ddd, *J* = 8.0, 7.0, 1.0 Hz, 1H), 4.75 – 4.66 (m, 1H), 3.69 (s, 2H), 3.44 (s, 6H), 2.30 (d, *J* = 6.7 Hz, 2H), 1.54 (s, 3H), 1.35 (s, 3H). <sup>13</sup>C NMR (125 MHz, Chloroform-*d*) δ 171.9, 135.7, 135.5, 135.3, 135.0, 134.8, 130.2, 129.6, 128.8, 128.0, 127.1, 122.6, 119.8, 119.7, 117.8, 110.8, 107.5, 58.9, 52.1, 30.8, 26.9, 25.8, 17.7. HRMS (ESI) (*m/z*) calculated for C<sub>25</sub>H<sub>27</sub>Cl NO<sub>4</sub> [M+H]<sup>+</sup>: 440.1623, found: 440.1629.

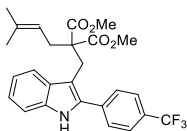

**dimethyl 2-(3-methylbut-2-en-1-yl)-2-((2-(4-(trifluoromethyl)phenyl)-1H-indol-3-yl)methyl)malonate (4h).**

White solid. Mp: 152.3-154.7°C. <sup>1</sup>H NMR (500 MHz, Chloroform-*d*) δ 8.16 (s, 1H), 7.63 (q, *J* = 6.46, 4H), 7.57 (dd, *J* = 8.0, 1.1 Hz, 1H), 7.31 (dd, *J* = 8.1, 1.0 Hz, 1H), 7.19 (ddd, *J* = 8.1, 7.0, 1.2 Hz, 1H), 7.11 (ddd, *J* = 8.0, 7.0, 1.1

Hz, 1H), 4.64 (dt,  $J = 8.2, 4.2$  Hz, 1H), 3.71 (s, 2H), 3.42 (s, 6H), 2.28 (d,  $J = 7.29$  Hz, 2H), 1.50 (d,  $J = 1.7$  Hz, 3H), 1.32 (d,  $J = 1.3$  Hz, 3H).  $^{13}\text{C}$  NMR (125 MHz, Chloroform-*d*)  $\delta$  171.4, 136.8, 135.4, 134.7 (d,  $J = 7.65$  Hz), 129.8 – 128.9 (m), 128.7, 125.3 (d,  $J = 3.81$  Hz), 124.6, 122.4 (d,  $J = 10.42$  Hz), 119.4, 119.2, 117.1, 110.4, 107.5, 58.4, 51.6, 30.3, 26.4, 25.2, 17.2. HRMS (ESI) ( $m/z$ ) calculated for  $\text{C}_{26}\text{H}_{27}\text{F}_3\text{NO}_4$   $[\text{M}+\text{H}]^+$ : 474.1887, found: 474.1896.

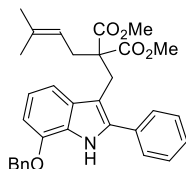

**dimethyl 2-((7-(benzyloxy)-2-phenyl-1H-indol-3-yl)methyl)-2-(3-methylbut-2-en-1-yl)malonate (4i).** Colorless oil.  $^1\text{H}$  NMR (400 MHz, Chloroform-*d*)  $\delta$  8.38 (s, 1H), 7.63 – 7.57 (m, 2H), 7.54 – 7.48 (m, 3H), 7.48 – 7.44 (m, 3H), 7.42 – 7.36 (m, 2H), 7.24 (d,  $J = 8.1$  Hz, 1H), 7.05 (t,  $J = 7.9$  Hz, 1H), 6.74 (d,  $J = 7.7$  Hz, 1H), 5.23 (s, 2H), 4.75 – 4.71 (m, 1H), 3.76 (s, 2H), 3.47 (s, 6H), 2.37 (d,  $J = 6.9$  Hz, 2H), 1.57 (d,  $J = 1.8$  Hz, 3H), 1.42 (d,  $J = 1.4$  Hz, 3H).  $^{13}\text{C}$  NMR (100 MHz, Chloroform-*d*)  $\delta$  172.1, 145.1, 137.1, 136.9, 134.7, 133.7, 131.2, 129.0, 128.9, 128.7, 128.2, 128.0, 128.0, 126.3, 120.0, 118.2, 112.6, 107.1, 103.2, 70.3, 59.0, 52.1, 30.8, 27.3, 25.9, 17.8. HRMS (ESI) ( $m/z$ ) calculated for  $\text{C}_{32}\text{H}_{34}\text{NO}_5$   $[\text{M}+\text{H}]^+$ : 512.2431, found: 512.2436.

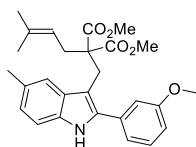

**dimethyl 2-((2-(3-methoxyphenyl)-5-methyl-1H-indol-3-yl)methyl)-2-(3-methylbut-2-en-1-yl)malonate (4j).** Colorless oil.  $^1\text{H}$  NMR (400 MHz, Chloroform-*d*)  $\delta$  8.29 (s, 1H), 7.36 (s, 1H), 7.32 (t,  $J = 7.90$  Hz, 1H), 7.17 (d,  $J = 8.2$  Hz, 1H), 7.14 – 7.07 (m, 2H), 7.00 (dd,  $J = 8.3, 1.6$  Hz, 1H), 6.90 (ddd,  $J = 8.3, 2.7, 1.0$  Hz, 1H), 4.79 – 4.70 (m, 1H), 3.83 (s, 3H), 3.74 (s, 2H), 3.47 (s, 6H), 2.47 (s, 3H), 2.35 (d,  $J = 6.7$  Hz, 2H), 1.57 (d,  $J = 1.7$  Hz, 3H), 1.38 (d,  $J = 1.5$  Hz, 3H).  $^{13}\text{C}$  NMR (100 MHz, Chloroform-*d*)  $\delta$  172.1, 159.8, 137.0, 135.1, 134.6, 134.0, 129.9, 129.9, 128.4, 123.7, 121.4, 119.1, 118.2, 114.2, 113.5, 110.5, 106.0, 58.9, 55.3, 52.0, 30.7, 27.0, 25.8, 21.7, 17.7. HRMS (ESI) ( $m/z$ ) calculated for  $\text{C}_{27}\text{H}_{32}\text{NO}_5$   $[\text{M}+\text{H}]^+$ : 450.2275, found: 450.2263.

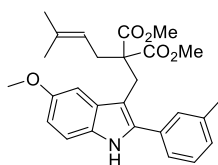

**dimethyl 2-((5-methoxy-2-(m-tolyl)-1H-indol-3-yl)methyl)-2-(3-methylbut-2-en-1-yl)malonate (4k).** Colorless oil.  $^1\text{H}$  NMR (400 MHz, Chloroform-*d*)  $\delta$  7.98 (s, 1H), 7.40 – 7.31 (m, 3H), 7.23 – 7.15 (m, 2H), 7.07 (d,  $J = 2.4$  Hz, 1H), 6.83 (dd,  $J = 8.7, 2.4$  Hz, 1H), 4.79 (tt,  $J = 7.0, 5.6, 2.1$  Hz, 1H), 3.87 (d,  $J = 1.1$  Hz, 3H), 3.71 (s, 2H), 3.41 (d,  $J = 1.1$  Hz, 6H), 2.42 (s, 3H), 2.34 (d,  $J = 6.8$  Hz, 2H), 1.55 (d,  $J = 1.7$  Hz, 3H), 1.39 (d,  $J = 1.6$  Hz, 3H).  $^{13}\text{C}$  NMR

(100 MHz, Chloroform-*d*)  $\delta$  172.2, 154.0, 138.4, 138.0, 134.6, 133.7, 130.8, 130.2, 129.4, 128.8, 128.5, 126.0, 118.2, 112.2, 111.5, 106.1, 101.4, 59.0, 55.8, 52.0, 30.7, 27.1, 25.9, 21.4, 17.7. **HRMS** (ESI) (m/z) calculated for C<sub>27</sub>H<sub>32</sub>NO<sub>5</sub> [M+H]<sup>+</sup>: 450.2275, found: 450.2266.

## 11. Characterization data of 2a-2y, 3a-3h, 5a-5k and 6-16

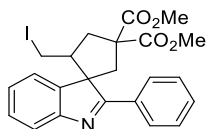

**dimethyl 2-(iodomethyl)-2'-phenylspiro[cyclopentane-1,3'-indole]-4,4-dicarboxylate (2a)**. White solid. Mp: 146.5-147.3°C. **Major**: <sup>1</sup>H NMR (600 MHz, Chloroform-*d*)  $\delta$  8.24 – 8.18 (m, 2H), 7.70 (d, *J* = 7.22 Hz, 1H), 7.54 – 7.50 (m, 3H), 7.43 – 7.38 (m, 2H), 7.28 – 7.23 (m, 1H), 3.88 (s, 3H), 3.82 (s, 3H), 3.66 (d, *J* = 15.58 Hz, 1H), 3.44 – 3.35 (m, 1H), 3.08 (dd, *J* = 14.09, 6.40 Hz, 1H), 2.82 – 2.73 (m, 2H), 2.42 (dd, *J* = 10.09, 4.14 Hz, 1H), 2.35 (t, *J* = 10.34 Hz, 1H). <sup>13</sup>C NMR (100 MHz, Chloroform-*d*)  $\delta$  178.5, 173.1, 172.0, 153.7, 142.0, 132.2, 131.0, 128.9, 128.8, 128.4, 126.4, 122.8, 121.6, 67.1, 58.1, 53.6, 53.4, 50.8, 42.5, 41.5, 2.2. **Minor**: <sup>1</sup>H NMR (400 MHz, Chloroform-*d*)  $\delta$  7.98 – 7.91 (m, 2H), 7.64 (d, *J* = 7.56 Hz, 1H), 7.55 – 7.42 (m, 3H), 7.44 – 7.34 (m, 2H), 7.31 (td, *J* = 7.43, 1.18 Hz, 1H), 3.90 (s, 3H), 3.83 (s, 3H), 3.54 (d, *J* = 15.94 Hz, 1H), 3.24 – 3.10 (m, 2H), 2.97 (dd, *J* = 13.65, 6.00 Hz, 1H), 2.75 (t, *J* = 9.76 Hz, 1H), 2.56 – 2.41 (m, 2H). <sup>13</sup>C NMR (100 MHz, Chloroform-*d*)  $\delta$  179.9, 172.8, 171.5, 153.4, 145.3, 135.8, 130.9, 129.0, 128.6, 128.4, 127.1, 121.7, 121.0, 66.5, 59.1, 53.5, 53.4, 53.0, 42.6, 41.5, 2.0. **HRMS** (ESI) (m/z) calculated for C<sub>23</sub>H<sub>23</sub>INO<sub>4</sub> [M+H]<sup>+</sup>: 504.0666, found: 504.0662.

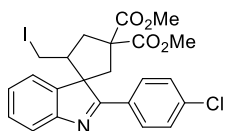

**dimethyl 2'-(4-chlorophenyl)-2-(iodomethyl)spiro[cyclopentane-1,3'-indole]-4,4-dicarboxylate (2b)**. Colorless oil. <sup>1</sup>H NMR (500 MHz, Chloroform-*d*)  $\delta$  8.25 – 8.19 (m, 2H), 7.68 (d, *J* = 7.64 Hz, 1H), 7.51 – 7.44 (m, 2H), 7.43 – 7.36 (m, 2H), 7.26 – 7.21 (m, 1H), 3.88 (s, 3H), 3.80 (s, 3H), 3.62 (d, *J* = 15.60 Hz, 1H), 3.37 – 3.27 (m, 1H), 3.02 (dd, *J* = 14.16, 6.42 Hz, 1H), 2.80 (t, *J* = 13.69 Hz, 1H), 2.72 (d, *J* = 15.59 Hz, 1H), 2.41 – 2.30 (m, 2H). <sup>13</sup>C NMR (125 MHz, Chloroform-*d*)  $\delta$  176.8, 172.7, 171.4, 153.0, 141.5, 136.8, 130.0, 129.3, 128.7, 128.3, 126.1, 122.3, 121.1, 66.4, 57.5, 53.2, 52.9, 50.4, 42.0, 41.0, 1.2. **HRMS** (ESI) (m/z) calculated for C<sub>23</sub>H<sub>22</sub>ClINO<sub>4</sub> [M+H]<sup>+</sup>: 538.0277, found: 538.0293.

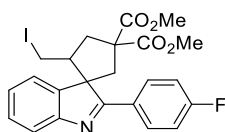

**dimethyl 2'-(4-fluorophenyl)-2-(iodomethyl)spiro[cyclopentane-1,3'-indole]-4,4-dicarboxylate (2c).** Colorless oil.  $^1\text{H NMR}$  (400 MHz, Chloroform-*d*)  $\delta$  8.35 – 8.25 (m, 2H), 7.69 (d,  $J = 7.47$  Hz, 1H), 7.40 (t,  $J = 7.51$  Hz, 2H), 7.30 – 7.15 (m, 3H), 3.89 (s, 3H), 3.82 (s, 3H), 3.65 (d,  $J = 15.53$  Hz, 1H), 3.40 – 3.27 (m, 1H), 3.03 (dd,  $J = 14.15$ , 6.45 Hz, 1H), 2.83 (t,  $J = 13.69$  Hz, 1H), 2.73 (d,  $J = 15.56$  Hz, 1H), 2.44 – 2.30 (m, 2H).  $^{13}\text{C NMR}$  (100 MHz, Chloroform-*d*)  $\delta$  177.4, 173.3, 172.0, 164.6 (d,  $J = 253.12$  Hz), 153.6, 141.9, 130.8 (d,  $J = 8.50$  Hz), 128.9, 128.4 (d,  $J = 3.16$  Hz), 126.5, 122.8, 121.6, 116.1 (d,  $J = 21.52$  Hz), 67.0, 58.1, 53.7, 53.5, 51.0, 42.7, 41.5, 1.9. **HRMS** (ESI) (m/z) calculated for  $\text{C}_{23}\text{H}_{22}\text{FINO}_4$   $[\text{M}+\text{H}]^+$ : 522.0572, found: 522.0572.

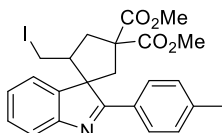

**dimethyl 2-(iodomethyl)-2'-(p-tolyl)spiro[cyclopentane-1,3'-indole]-4,4-dicarboxylate (2d).** Colorless oil.  $^1\text{H NMR}$  (500 MHz, Chloroform-*d*)  $\delta$  8.18 – 8.11 (m, 2H), 7.69 (dd,  $J = 8.1$ , 1.1 Hz, 1H), 7.41 (dtd,  $J = 7.9$ , 3.9, 1.2 Hz, 2H), 7.36 – 7.31 (m, 2H), 7.25 (td,  $J = 7.5$ , 1.1 Hz, 1H), 3.90 (s, 3H), 3.83 (s, 3H), 3.66 (d,  $J = 15.6$  Hz, 1H), 3.41 (dddd,  $J = 13.1$ , 10.6, 6.4, 4.1 Hz, 1H), 3.10 (dd,  $J = 14.1$ , 6.4 Hz, 1H), 2.85 – 2.74 (m, 2H), 2.49 – 2.32 (m, 5H).  $^{13}\text{C NMR}$  (125 MHz, Chloroform-*d*)  $\delta$  179.8, 174.5, 173.4, 155.2, 143.4, 142.9, 131.0, 130.7, 130.1, 129.7, 127.5, 124.1, 122.7, 68.3, 59.5, 54.9, 54.7, 52.4, 44.1, 42.9, 24.9, 22. **HRMS** (ESI) (m/z) calculated for  $\text{C}_{24}\text{H}_{25}\text{INO}_4$   $[\text{M}+\text{H}]^+$ : 518.0823, found: 518.0819.

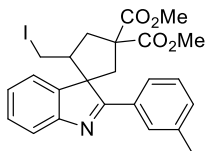

**dimethyl 2-(iodomethyl)-2'-(m-tolyl)spiro[cyclopentane-1,3'-indole]-4,4-dicarboxylate (2e).** Colorless oil.  $^1\text{H NMR}$  (600 MHz, Chloroform-*d*)  $\delta$  8.07 (d,  $J = 1.9$  Hz, 1H), 7.99 (dt,  $J = 7.7$ , 1.3 Hz, 1H), 7.69 (dd,  $J = 8.0$ , 1.1 Hz, 1H), 7.42 – 7.37 (m, 3H), 7.33 (ddt,  $J = 7.5$ , 1.8, 0.9 Hz, 1H), 7.26 – 7.22 (m, 1H), 3.88 (s, 3H), 3.82 (s, 3H), 3.66 (d,  $J = 15.6$  Hz, 1H), 3.45 – 3.36 (m, 1H), 3.09 (dd,  $J = 14.1$ , 6.4 Hz, 1H), 2.80 (d,  $J = 15.6$  Hz, 1H), 2.75 (dd,  $J = 14.0$ , 13.2 Hz, 1H), 2.47 (s, 3H), 2.41 (dd,  $J = 10.1$ , 4.1 Hz, 1H), 2.34 (t,  $J = 10.4$  Hz, 1H).  $^{13}\text{C NMR}$  (125 MHz, Chloroform-*d*)  $\delta$  178.6, 173.0, 172.0, 153.7, 142.0, 138.7, 132.0, 131.9, 129.0, 128.7, 128.7, 126.2, 125.3, 122.8, 121.4, 67.0, 58.0, 53.5, 53.3, 50.8, 42.6, 41.5, 21.5, 2.2. **HRMS** (ESI) (m/z) calculated for  $\text{C}_{24}\text{H}_{25}\text{INO}_4$   $[\text{M}+\text{H}]^+$ : 518.0823, found: 518.0825.

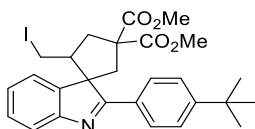



**dimethyl 2'-(4-(tert-butyl)phenyl)-2-(iodomethyl)spiro[cyclopentane-1,3'-indole]-4,4-dicarboxylate (2f).**

Colorless oil.  $^1\text{H NMR}$  (500 MHz,  $\text{DMSO-}d_6$ )  $\delta$  8.09 – 8.03 (m, 2H), 7.64 (dd,  $J = 7.7, 1.1$  Hz, 1H), 7.57 – 7.52 (m, 2H), 7.44 – 7.36 (m, 2H), 7.27 (td,  $J = 7.5, 1.1$  Hz, 1H), 3.84 (s, 3H), 3.76 (s, 3H), 3.38 (d,  $J = 15.6$  Hz, 1H), 3.32 – 3.25 (m, 1H), 2.99 (dd,  $J = 13.9, 6.5$  Hz, 1H), 2.73 (d,  $J = 15.6$  Hz, 1H), 2.66 (t,  $J = 13.5$  Hz, 1H), 2.46 (t,  $J = 9.9$  Hz, 1H), 2.31 (dd,  $J = 9.9, 5.2$  Hz, 1H), 1.32 (s, 9H).  $^{13}\text{C NMR}$  (125 MHz,  $\text{DMSO-}d_6$ )  $\delta$  177.4, 172.6, 171.1, 153.8, 153.5, 141.8, 129.1, 128.5, 127.7, 125.9, 125.6, 122.8, 120.9, 66.1, 57.5, 53.6, 53.3, 50.3, 42.2, 40.8, 34.7, 30.8, 24.1, 2.5. **HRMS** (ESI) (m/z) calculated for  $\text{C}_{27}\text{H}_{31}\text{INO}_4$   $[\text{M}+\text{H}]^+$ : 560.1292, found: 560.1298.

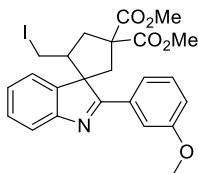

**dimethyl 2-(iodomethyl)-2'-(3-methoxyphenyl)spiro[cyclopentane-1,3'-indole]-4,4-dicarboxylate (2g).**

Colorless oil.  $^1\text{H NMR}$  (500 MHz,  $\text{DMSO-}d_6$ )  $\delta$  7.71 – 7.66 (m, 1H), 7.64 – 7.60 (m, 2H), 7.50 – 7.39 (m, 3H), 7.31 (td,  $J = 7.4, 1.1$  Hz, 1H), 7.17 – 7.14 (m, 1H), 3.86 (s, 3H), 3.83 (s, 3H), 3.77 (s, 3H), 3.37 (d,  $J = 15.5$  Hz, 1H), 3.33 – 3.25 (m, 1H), 2.99 (dd,  $J = 13.9, 6.5$  Hz, 1H), 2.76 (d,  $J = 15.5$  Hz, 1H), 2.65 (t,  $J = 13.5$  Hz, 1H), 2.55 – 2.51 (m, 1H), 2.35 (dd,  $J = 10.1, 5.4$  Hz, 1H).  $^{13}\text{C NMR}$  (125 MHz,  $\text{DMSO-}d_6$ )  $\delta$  178.2, 172.9, 171.6, 159.9, 153.8, 142.3, 133.8, 130.3, 129.0, 126.7, 123.4, 121.6, 120.6, 117.1, 113.7, 66.8, 58.0, 55.8, 54.0, 53.8, 50.7, 42.5, 41.2, 2.8. **HRMS** (ESI) (m/z) calculated for  $\text{C}_{24}\text{H}_{25}\text{INO}_5$   $[\text{M}+\text{H}]^+$ : 534.0772, found: 534.0757.

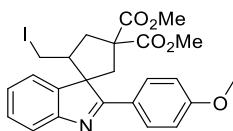

**dimethyl 2-(iodomethyl)-2'-(4-methoxyphenyl)spiro[cyclopentane-1,3'-indole]-4,4-dicarboxylate (2h).**

Colorless oil.  $^1\text{H NMR}$  (400 MHz,  $\text{Chloroform-}d$ )  $\delta$  8.28 (d,  $J = 8.93$  Hz, 2H), 7.67 (d,  $J = 7.28$  Hz, 1H), 7.44 – 7.36 (m, 2H), 7.28 – 7.17 (m, 1H), 7.08 – 7.00 (m, 2H), 3.92 (d,  $J = 2.96$  Hz, 6H), 3.84 (s, 3H), 3.69 (d,  $J = 15.44$  Hz, 1H), 3.46 – 3.32 (m, 1H), 3.07 (dd,  $J = 14.15, 6.45$  Hz, 1H), 2.90 – 2.74 (m, 2H), 2.43 (dd,  $J = 10.01, 4.08$  Hz, 1H), 2.35 (t,  $J = 10.28$  Hz, 1H).  $^{13}\text{C NMR}$  (100 MHz,  $\text{Chloroform-}d$ )  $\delta$  177.7, 173.3, 172.0, 141.8, 130.2, 128.6, 125.8, 122.7, 121.0, 114.2, 66.7, 58.0, 55.5, 53.6, 53.3, 51.3, 43.0, 41.5, 2.3. **HRMS** (ESI) (m/z) calculated for  $\text{C}_{24}\text{H}_{25}\text{INO}_5$   $[\text{M}+\text{H}]^+$ : 534.0772, found: 534.0773.

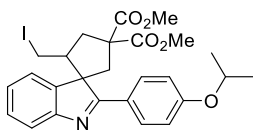

**dimethyl 2-(iodomethyl)-2'-(4-isopropoxyphenyl)spiro[cyclopentane-1,3'-indole]-4,4-dicarboxylate (2i).**

Colorless oil.  $^1\text{H NMR}$  (600 MHz, Chloroform-*d*)  $\delta$  8.22 (d,  $J = 9.0$  Hz, 2H), 7.67–7.62 (m, 1H), 7.38 (dd,  $J = 7.9$ , 6.8 Hz, 2H), 7.21 (td,  $J = 7.5$ , 1.1 Hz, 1H), 7.02–6.96 (m, 2H), 4.67 (h,  $J = 11.65$ , 5.89 Hz, 1H), 3.90 (s, 3H), 3.82 (s, 3H), 3.65 (d,  $J = 15.6$  Hz, 1H), 3.44–3.34 (m, 1H), 3.07 (dd,  $J = 14.2$ , 6.4 Hz, 1H), 2.83–2.75 (m, 2H), 2.42 (dd,  $J = 10.0$ , 4.0 Hz, 1H), 2.33 (t,  $J = 10.4$  Hz, 1H), 1.39 (d,  $J = 6.1$  Hz, 6H).  $^{13}\text{C NMR}$  (125 MHz, Chloroform-*d*)  $\delta$  177.3, 172.8, 171.5, 160.0, 153.4, 141.4, 129.8, 128.2, 125.3, 123.7, 122.2, 120.5, 115.2, 69.6, 66.2, 57.6, 53.1, 52.9, 50.8, 42.5, 41.1, 21.6, 21.6. **HRMS** (ESI) ( $m/z$ ) calculated for  $\text{C}_{26}\text{H}_{29}\text{INO}_5$  [ $\text{M}+\text{H}$ ] $^+$ : 562.1085, found: 562.1091.

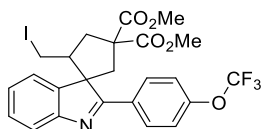

**dimethyl 2-(iodomethyl)-2'-(4-(trifluoromethoxy)phenyl)spiro[cyclopentane-1,3'-indole]-4,4-dicarboxylate (2j).**

White solid. Mp: 185.7-186.3°C.  $^1\text{H NMR}$  (600 MHz, DMSO-*d*<sub>6</sub>)  $\delta$  8.24–8.19 (m, 2H), 7.68 (d,  $J = 7.7$  Hz, 1H), 7.55 (d,  $J = 8.4$  Hz, 2H), 7.46–7.39 (m, 2H), 7.31 (t,  $J = 7.5$  Hz, 1H), 3.82 (s, 3H), 3.76 (s, 3H), 3.36 (d,  $J = 15.7$  Hz, 1H), 3.32–3.24 (m, 1H), 2.94 (dd,  $J = 14.0$ , 6.5 Hz, 1H), 2.74–2.65 (m, 2H), 2.56 (t,  $J = 9.3$  Hz, 1H), 2.38 (dd,  $J = 10.1$ , 5.8 Hz, 1H).  $^{13}\text{C NMR}$  (150 MHz, DMSO-*d*<sub>6</sub>)  $\delta$  177.2, 173.0, 171.5, 153.8, 150.3, 142.2, 131.7, 130.5, 129.1, 126.9, 121.8, 121.5, 120.5 (q,  $J = 257.33$  Hz), 66.7, 58.0, 54.1, 53.8, 50.2, 42.3, 41.3, 2.7. **HRMS** (ESI) ( $m/z$ ) calculated for  $\text{C}_{24}\text{H}_{22}\text{F}_3\text{INO}_5$  [ $\text{M}+\text{H}$ ] $^+$ : 588.0489, found: 588.0506.

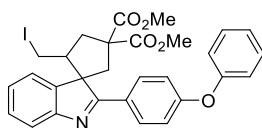

**dimethyl 2-(iodomethyl)-2'-(4-phenoxyphenyl)spiro[cyclopentane-1,3'-indole]-4,4-dicarboxylate (2k).**

Colorless oil.  $^1\text{H NMR}$  (500 MHz, DMSO-*d*<sub>6</sub>)  $\delta$  8.17–8.11 (m, 2H), 7.63 (dd,  $J = 7.7$ , 1.0 Hz, 1H), 7.50–7.44 (m, 2H), 7.44–7.37 (m, 2H), 7.31–7.22 (m, 2H), 7.18–7.14 (m, 2H), 7.13–7.08 (m, 2H), 3.81 (s, 3H), 3.76 (s, 3H), 3.37 (d,  $J = 15.6$  Hz, 1H), 3.32–3.24 (m, 1H), 2.96 (dd,  $J = 14.0$ , 6.5 Hz, 1H), 2.74–2.65 (m, 2H), 2.55–2.50 (m, 1H), 2.34 (dd,  $J = 10.0$ , 5.5 Hz, 1H).  $^{13}\text{C NMR}$  (125 MHz, DMSO-*d*<sub>6</sub>)  $\delta$  176.4, 172.1, 170.6, 158.9, 154.7, 153.0, 141.2, 129.8, 129.5, 128.0, 126.0, 125.3, 124.0, 122.3, 120.3, 119.4, 117.1, 65.5, 57.0, 53.1, 52.8, 49.7, 41.7, 40.3, 1.8. **HRMS** (ESI) ( $m/z$ ) calculated for  $\text{C}_{29}\text{H}_{27}\text{INO}_5$  [ $\text{M}+\text{H}$ ] $^+$ : 596.0928, found: 596.0919.

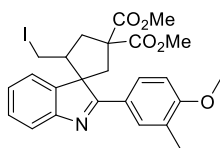

**dimethyl 2-(iodomethyl)-2'-(4-methoxy-3-methylphenyl)spiro[cyclopentane-1,3'-indole]-4,4-dicarboxylate (2l).** White solid. Mp: 135.9-137.1°C.  $^1\text{H NMR}$  (600 MHz, Chloroform-*d*)  $\delta$  8.19 – 8.07 (m, 2H), 7.65 (d,  $J = 7.9$  Hz, 1H), 7.40 – 7.33 (m, 2H), 7.21 (t,  $J = 7.4$  Hz, 1H), 6.93 (d,  $J = 8.6$  Hz, 1H), 3.91 (d,  $J = 7.5$  Hz, 6H), 3.82 (s, 3H), 3.68 (d,  $J = 15.6$  Hz, 1H), 3.45 – 3.35 (m, 1H), 3.07 (dd,  $J = 14.2, 6.4$  Hz, 1H), 2.79 (dd,  $J = 14.8, 11.3$  Hz, 2H), 2.42 (dd,  $J = 10.1, 4.0$  Hz, 1H), 2.34 (d,  $J = 10.5$  Hz, 1H), 2.32 (s, 3H).  $^{13}\text{C NMR}$  (150 MHz, Chloroform-*d*)  $\delta$  177.9, 173.3, 172.0, 160.3, 153.9, 141.9, 130.9, 128.6, 127.7, 127.3, 125.7, 124.0, 122.7, 120.9, 109.7, 66.8, 58.0, 55.5, 53.6, 53.3, 51.4, 43.1, 41.5, 16.30, 2.5. **HRMS** (ESI) ( $m/z$ ) calculated for  $\text{C}_{25}\text{H}_{27}\text{INO}_6$   $[\text{M}+\text{H}]^+$ : 548.0928, found: 548.0939.

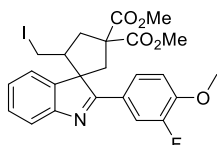

**dimethyl 2'-(3-fluoro-4-methoxyphenyl)-2-(iodomethyl)spiro[cyclopentane-1,3'-indole]-4,4-dicarboxylate (2m).** White solid. Mp: 118.4-119.5°C.  $^1\text{H NMR}$  (600 MHz, Chloroform-*d*)  $\delta$  8.15 – 8.04 (m, 2H), 7.66 (d,  $J = 7.7$  Hz, 1H), 7.43 – 7.36 (m, 2H), 7.24 (td,  $J = 7.5, 1.1$  Hz, 1H), 7.08 (t,  $J = 8.6$  Hz, 1H), 3.98 (s, 3H), 3.92 (s, 3H), 3.82 (s, 3H), 3.64 (d,  $J = 15.6$  Hz, 1H), 3.39 – 3.30 (m, 1H), 3.04 (dd,  $J = 14.2, 6.4$  Hz, 1H), 2.87 – 2.72 (m, 2H), 2.43 – 2.28 (m, 2H).  $^{13}\text{C NMR}$  (125 MHz, Chloroform-*d*)  $\delta$  176.8, 173.4, 172.0, 153.4 (d,  $J = 40.41$  Hz), 151.3, 150.3 (d,  $J = 10.79$  Hz), 142.0, 128.8, 126.3, 125.2 (d,  $J = 3.58$  Hz), 122.8, 121.4, 116.3 (d,  $J = 20.32$  Hz), 113.0, 66.8, 58.1, 56.4, 53.7, 53.4, 51.3, 42.9, 41.6, 2.0. **HRMS** (ESI) ( $m/z$ ) calculated for  $\text{C}_{24}\text{H}_{24}\text{FINO}_5$   $[\text{M}+\text{H}]^+$ : 552.0678, found: 552.0683.

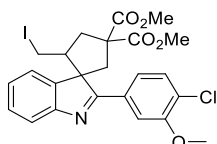

**dimethyl 2'-(4-chloro-3-methoxyphenyl)-2-(iodomethyl)spiro[cyclopentane-1,3'-indole]-4,4-dicarboxylate (2n).** White solid. Mp: 168.9-170.3°C.  $^1\text{H NMR}$  (600 MHz, Chloroform-*d*)  $\delta$  7.95 (d,  $J = 1.9$  Hz, 1H), 7.74 (dd,  $J = 8.3, 2.0$  Hz, 1H), 7.69 (d,  $J = 7.7$  Hz, 1H), 7.50 (d,  $J = 8.3$  Hz, 1H), 7.43 – 7.37 (m, 2H), 7.27 (d,  $J = 5.7$  Hz, 1H), 4.06 (s, 3H), 3.87 (s, 3H), 3.82 (s, 3H), 3.65 (d,  $J = 15.6$  Hz, 1H), 3.41 – 3.30 (m, 1H), 3.03 (dd,  $J = 14.2, 6.4$  Hz, 1H), 2.82 (t,  $J = 13.7$  Hz, 1H), 2.73 (d,  $J = 15.6$  Hz, 1H), 2.44 – 2.32 (m, 2H).  $^{13}\text{C NMR}$  (125 MHz, Chloroform-*d*)  $\delta$  176.9, 172.7, 171.4, 155.0, 153.0, 141.5, 131.5, 129.8, 128.3, 126.1, 125.5, 122.3, 121.2, 120.7, 111.5, 66.6, 57.4, 56.1, 53.1, 52.9, 50.5, 42.1, 40.9, 1.2. **HRMS** (ESI) ( $m/z$ ) calculated for  $\text{C}_{24}\text{H}_{24}\text{ClINO}_5$   $[\text{M}+\text{H}]^+$ : 568.0382, found: 568.0378.

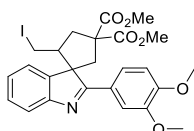

**dimethyl 2'-(3,4-dimethoxyphenyl)-2-(iodomethyl)spiro[cyclopentane-1,3'-indole]-4,4-dicarboxylate (2o).**

White solid. Mp: 133.5-134.7°C. <sup>1</sup>H NMR (600 MHz, Chloroform-*d*) δ 7.96 (d, *J* = 2.0 Hz, 1H), 7.82 (dt, *J* = 8.5, 1.4 Hz, 1H), 7.66 (d, *J* = 7.7 Hz, 1H), 7.41 – 7.36 (m, 2H), 7.22 (t, *J* = 7.5 Hz, 1H), 6.97 (d, *J* = 8.4 Hz, 1H), 4.04 (s, 3H), 3.97 (s, 3H), 3.89 (s, 3H), 3.82 (s, 3H), 3.70 (d, *J* = 15.5 Hz, 1H), 3.45 – 3.36 (m, 1H), 3.04 (dd, *J* = 14.3, 6.5 Hz, 1H), 2.83 (t, *J* = 13.7 Hz, 1H), 2.76 (d, *J* = 15.6 Hz, 1H), 2.42 (dd, *J* = 10.1, 4.0 Hz, 1H), 2.34 (t, *J* = 10.3 Hz, 1H). <sup>13</sup>C NMR (125 MHz, Chloroform-*d*) δ 177.2, 172., 171.5, 153.2, 151.3, 148.9, 141.4, 128.2, 125.4, 124.5, 122.2, 121.4, 120.6, 110.9, 110.0, 66.4, 57.5, 55.8, 55.6, 53.1, 52.9, 51.1, 42.7, 41.0, 1.8. HRMS (ESI) (*m/z*) calculated for C<sub>25</sub>H<sub>27</sub>INO<sub>6</sub> [M+H]<sup>+</sup>: 564.0878, found: 564.0870.

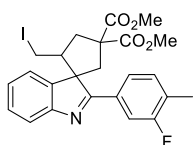

**dimethyl 2'-(3-fluoro-4-methylphenyl)-2-(iodomethyl)spiro[cyclopentane-1,3'-indole]-4,4-dicarboxylate (2p).**

White solid. Mp: 118.3-119.4°C. <sup>1</sup>H NMR (400 MHz, DMSO-*d*<sub>6</sub>) δ 7.86 – 7.79 (m, 2H), 7.66 (d, *J* = 7.7 Hz, 1H), 7.51 – 7.37 (m, 3H), 7.30 (td, *J* = 7.5, 1.2 Hz, 1H), 3.84 (s, 3H), 3.76 (s, 3H), 3.35 (d, *J* = 12.3 Hz, 1H), 3.31 – 3.21 (m, 1H), 2.96 (dd, *J* = 14.0, 6.4 Hz, 1H), 2.76 – 2.63 (m, 2H), 2.58 – 2.51 (m, 1H), 2.38 – 2.28 (m, 4H). <sup>13</sup>C NMR (150 MHz, DMSO-*d*<sub>6</sub>) δ 177.1 (d, *J* = 2.46 Hz), 173.1, 171.5, 161.1 (d, *J* = 243.16 Hz), 153.7, 142.4, 132.5 (d, *J* = 5.12 Hz), 132.1 (d, *J* = 7.51 Hz), 129.1, 128.1 (d, *J* = 17.17 Hz), 126.8, 124.1 (d, *J* = 2.99 Hz), 123.3, 121.7, 114.5 (d, *J* = 24.17 Hz), 66.6, 58.0, 54.1, 53.8, 50.7, 42.5, 41.2, 14.7 (d, *J* = 2.85 Hz), 2.6. HRMS (ESI) (*m/z*) calculated for C<sub>24</sub>H<sub>24</sub>FINO<sub>4</sub> [M+H]<sup>+</sup>: 536.0717, found: 536.0724.

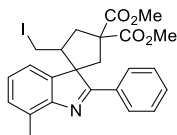

**dimethyl 2-(iodomethyl)-7'-methyl-2'-phenylspiro[cyclopentane-1,3'-indole]-4,4-dicarboxylate (2q).**

White solid. Mp: 101.9-102.4°C. <sup>1</sup>H NMR (500 MHz, Chloroform-*d*) δ 8.25 – 8.15 (m, 2H), 7.50 (dd, *J* = 5.2, 2.0 Hz, 3H), 7.20 (d, *J* = 7.4 Hz, 2H), 7.14 (dd, *J* = 8.3, 6.6 Hz, 1H), 3.85 (s, 3H), 3.80 (s, 3H), 3.62 (d, *J* = 15.5 Hz, 1H), 3.43 – 3.32 (m, 1H), 3.06 (dd, *J* = 14.1, 6.4 Hz, 1H), 2.78 – 2.70 (m, 2H), 2.65 (s, 3H), 2.42 (dd, *J* = 10.0, 4.0 Hz, 1H), 2.35 (t, *J* = 10.3 Hz, 1H). <sup>13</sup>C NMR (125 MHz, Chloroform-*d*) δ 177.2, 173.1, 172.0, 152.2, 141.8, 132.5, 131.4, 130.7, 129.9, 128.9, 128.8, 128.4, 128.3, 126.2, 120.1, 67.2, 58.1, 53.5, 53.3, 50.6, 42.5, 41.4, 16.9, 2.5. HRMS (ESI) (*m/z*) calculated for C<sub>24</sub>H<sub>25</sub>INO<sub>4</sub> [M+H]<sup>+</sup>: 518.0823, found: 518.0822.

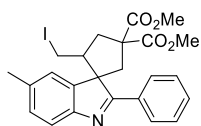

**dimethyl 2-(iodomethyl)-5'-methyl-2'-phenylspiro[cyclopentane-1,3'-indole]-4,4-dicarboxylate (2r).** Colorless oil.  $^1\text{H NMR}$  (500 MHz,  $\text{DMSO-}d_6$ )  $\delta$  8.08 – 8.00 (m, 2H), 7.55 – 7.49 (m, 4H), 7.24 – 7.18 (m, 2H), 3.81 (s, 3H), 3.76 (s, 3H), 3.35 (d,  $J = 15.5$  Hz, 1H), 3.30 – 3.21 (m, 1H), 2.96 (dd,  $J = 13.9, 6.5$  Hz, 1H), 2.75 – 2.62 (m, 2H), 2.54 (t,  $J = 9.6$  Hz, 1H), 2.37 (s, 3H), 2.33 (dd,  $J = 10.0, 5.3$  Hz, 1H).  $^{13}\text{C NMR}$  (125 MHz,  $\text{DMSO-}d_6$ )  $\delta$  176.9, 172.5, 171.1, 151.3, 142.0, 135.6, 132.1, 130.7, 129.0, 128.8, 127.7, 123.6, 120.6, 66.1, 57.6, 53.5, 53.3, 50.0, 42.1, 40.7, 21.4, 2.7. **HRMS** (ESI) ( $m/z$ ) calculated for  $\text{C}_{24}\text{H}_{25}\text{INO}_4$   $[\text{M}+\text{H}]^+$ : 518.0823, found: 518.0822.

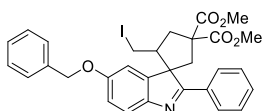

**dimethyl 5'-(benzyloxy)-2-(iodomethyl)-2'-phenylspiro[cyclopentane-1,3'-indole]-4,4-dicarboxylate (2s).** Colorless oil.  $^1\text{H NMR}$  (500 MHz,  $\text{DMSO-}d_6$ )  $\delta$  8.03 (dd,  $J = 6.7, 3.1$  Hz, 2H), 7.57 (d,  $J = 8.4$  Hz, 1H), 7.53 – 7.49 (m, 3H), 7.48 – 7.44 (m, 2H), 7.39 (dd,  $J = 8.3, 6.7$  Hz, 2H), 7.35 – 7.30 (m, 1H), 7.07 – 6.99 (m, 2H), 5.22 – 5.08 (m, 2H), 3.82 (s, 3H), 3.77 (s, 3H), 3.38 (d,  $J = 15.6$  Hz, 1H), 3.26 – 3.14 (m, 1H), 2.92 (dd,  $J = 14.0, 6.5$  Hz, 1H), 2.69 (d,  $J = 15.6$  Hz, 1H), 2.60 (t,  $J = 13.5$  Hz, 1H), 2.42 (t,  $J = 9.6$  Hz, 1H), 2.28 (dd,  $J = 9.9, 5.1$  Hz, 1H).  $^{13}\text{C NMR}$  (125 MHz,  $\text{DMSO-}d_6$ )  $\delta$  175.7, 172.5, 171.3, 157.0, 147.2, 143.4, 136.8, 132.1, 130.5, 128.8, 128.5, 128.0, 127.9, 127.6, 121.6, 114.7, 110.3, 90.9, 69.8, 66.5, 61.6, 57.6, 53.6, 53.4, 50.1, 42.1, 40.5, 2.5. **HRMS** (ESI) ( $m/z$ ) calculated for  $\text{C}_{30}\text{H}_{29}\text{INO}_5$   $[\text{M}+\text{H}]^+$ : 610.1085, found: 610.1085.

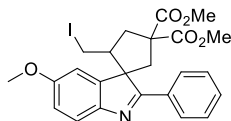

**dimethyl 2-(iodomethyl)-5'-methoxy-2'-phenylspiro[cyclopentane-1,3'-indole]-4,4-dicarboxylate (2t).** Colorless oil.  $^1\text{H NMR}$  (500 MHz,  $\text{Chloroform-}d$ )  $\delta$  8.18 – 8.12 (m, 2H), 7.58 (d,  $J = 8.5$  Hz, 1H), 7.48 (dd,  $J = 5.2, 2.1$  Hz, 3H), 7.01 (d,  $J = 2.5$  Hz, 1H), 6.91 (dd,  $J = 8.5, 2.5$  Hz, 1H), 3.86 (s, 3H), 3.84 (s, 3H), 3.80 (s, 3H), 3.67 (d,  $J = 15.6$  Hz, 1H), 3.41 – 3.32 (m, 1H), 3.04 (dd,  $J = 14.1, 6.5$  Hz, 1H), 2.80 – 2.70 (m, 2H), 2.44 (dd,  $J = 10.0, 4.3$  Hz, 1H), 2.39 (t,  $J = 10.3$  Hz, 1H).  $^{13}\text{C NMR}$  (125 MHz,  $\text{Chloroform-}d$ )  $\delta$  176.2, 173.0, 172.1, 158.7, 147.4, 143.6, 132.2, 130.6, 129.0, 128.8, 128.1, 128.0, 121.9, 113.4, 109.6, 67.2, 58.0, 55.8, 53.5, 53.3, 50.6, 42.7, 41.2, 2.2. **HRMS** (ESI) ( $m/z$ ) calculated for  $\text{C}_{24}\text{H}_{25}\text{INO}_5$   $[\text{M}+\text{H}]^+$ : 534.0772, found: 534.0772.

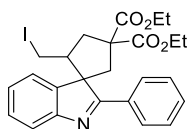

**diethyl 2-(iodomethyl)-2'-phenylspiro[cyclopentane-1,3'-indole]-4,4-dicarboxylate (2u).** Colorless oil.  $^1\text{H NMR}$  (500 MHz,  $\text{DMSO-}d_6$ )  $\delta$  8.11 – 8.06 (m, 2H), 7.67 (dd,  $J = 7.61, 1.15$  Hz, 1H), 7.58 – 7.52 (m, 3H), 7.46 – 7.39 (m, 2H),

7.30 (td,  $J = 7.48, 1.16$  Hz, 1H), 4.33 – 4.26 (m, 2H), 4.23 (q,  $J = 7.06$  Hz, 2H), 3.37 (s, 1H), 3.32 – 3.24 (m, 1H), 2.96 (dd,  $J = 13.90, 6.46$  Hz, 1H), 2.73 (d,  $J = 15.56$  Hz, 1H), 2.64 (t,  $J = 13.46$  Hz, 1H), 2.54 – 2.50 (m, 1H), 2.35 (dd,  $J = 9.98, 5.35$  Hz, 1H), 1.22 (dt,  $J = 14.00, 7.07$  Hz, 6H).  $^{13}\text{C NMR}$  (125 MHz, DMSO- $d_6$ )  $\delta$  177.9, 172.0, 170.6, 153.4, 141.8, 132.0, 130.9, 128.8, 128.5, 127.8, 126.1, 122.9, 121.1, 66.3, 62.2, 61.9, 57.7, 50.2, 41.8, 40.6, 13.8, 2.4. **HRMS** (ESI) (m/z) calculated for  $\text{C}_{25}\text{H}_{27}\text{INO}_4$   $[\text{M}+\text{H}]^+$ : 532.0979, found: 532.0992.

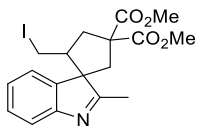

**dimethyl 2-(iodomethyl)-2'-methylspiro[cyclopentane-1,3'-indole]-4,4-dicarboxylate (2v)**. Colorless oil.  $^1\text{H NMR}$  (400 MHz, Chloroform- $d$ )  $\delta$  7.53 (d,  $J = 7.6$  Hz, 1H), 7.37 – 7.27 (m, 2H), 7.19 (td,  $J = 7.4, 1.1$  Hz, 1H), 3.86 (s, 3H), 3.79 (s, 3H), 3.17 (d,  $J = 15.0$  Hz, 1H), 2.95 (dd,  $J = 13.0, 5.8$  Hz, 1H), 2.90 – 2.81 (m, 1H), 2.70 (t,  $J = 12.9$  Hz, 1H), 2.49 – 2.39 (m, 2H), 2.39 – 2.34 (m, 4H).  $^{13}\text{C NMR}$  (100 MHz, Chloroform- $d$ )  $\delta$  183.5, 172.6, 171.7, 154.4, 140.3, 128.5, 125.6, 122.8, 120.5, 66.8, 57.8, 53.5, 53.2, 49.0, 41.5, 41.4, 15.5, 1.6. **HRMS** (ESI) (m/z) calculated for  $\text{C}_{18}\text{H}_{21}\text{INO}_4$   $[\text{M}+\text{H}]^+$ : 442.0510, found: 442.0497.

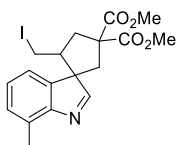

**dimethyl 2-(iodomethyl)-7'-methylspiro[cyclopentane-1,3'-indole]-4,4-dicarboxylate (2w)**. Colorless oil.  $^1\text{H NMR}$  (600 MHz, Chloroform- $d$ )  $\delta$  8.00 (s, 1H), 7.21 – 7.11 (m, 3H), 3.85 (s, 3H), 3.78 (s, 3H), 3.20 (d,  $J = 16.98$  Hz, 1H), 3.03 – 2.94 (m, 2H), 2.57 (s, 3H), 2.54 – 2.38 (m, 4H).  $^{13}\text{C NMR}$  (100 MHz, Chloroform- $d$ )  $\delta$  175.1, 172.4, 171.6, 153.7, 138.8, 131.4, 130.1, 126.5, 120.5, 66.0, 58.1, 53.4, 53.2, 46.5, 41.7, 39.8, 16.8, 2.7. **HRMS** (ESI) (m/z) calculated for  $\text{C}_{18}\text{H}_{21}\text{INO}_4$   $[\text{M}+\text{H}]^+$ : 442.0510, found: 442.0512.

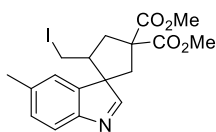

**dimethyl 2-(iodomethyl)-5'-methylspiro[cyclopentane-1,3'-indole]-4,4-dicarboxylate (2x)**. Colorless oil.  $^1\text{H NMR}$  (600 MHz, Chloroform- $d$ )  $\delta$  7.96 (s, 1H), 7.50 (d,  $J = 7.85$  Hz, 1H), 7.19 – 7.15 (m, 1H), 7.11 (s, 1H), 3.85 (s, 3H), 3.79 (s, 3H), 3.18 (d,  $J = 14.87$  Hz, 1H), 3.02 – 2.94 (m, 2H), 2.63 – 2.57 (m, 1H), 2.54 (t,  $J = 10.08$  Hz, 1H), 2.47 (d,  $J = 14.87$  Hz, 1H), 2.43 – 2.39 (m, 4H).  $^{13}\text{C NMR}$  (100 MHz, Chloroform- $d$ )  $\delta$  175.4, 172.4, 171.6, 153.1, 139.2, 136.6, 129.3, 123.9, 121.2, 65.6, 58.1, 53.4, 53.2, 46.4, 41.8, 39.9, 21.7, 2.7. **HRMS** (ESI) (m/z) calculated for  $\text{C}_{18}\text{H}_{21}\text{INO}_4$   $[\text{M}+\text{H}]^+$ : 442.0510, found: 442.0497.

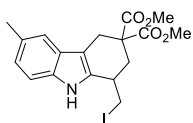

**dimethyl 1-(iodomethyl)-6-methyl-1,2,4,9-tetrahydro-3H-carbazole-3,3-dicarboxylate (2y).** Colorless oil.  $^1\text{H NMR}$  (400 MHz, Chloroform-*d*)  $\delta$  8.07 (s, 1H), 7.32 (s, 1H), 7.22 (d,  $J = 8.2$  Hz, 1H), 7.03 (dd,  $J = 8.2, 1.7$  Hz, 1H), 3.83 (s, 3H), 3.66 (s, 3H), 3.58 (dt,  $J = 15.6, 1.5$  Hz, 1H), 3.51 – 3.36 (m, 3H), 3.12 (dd,  $J = 15.7, 2.0$  Hz, 1H), 2.86 – 2.76 (m, 1H), 2.47 (s, 3H), 2.07 – 1.96 (m, 1H).  $^{13}\text{C NMR}$  (100 MHz, Chloroform-*d*)  $\delta$  172.0, 171.0, 134.6, 133.2, 128.9, 127.0, 123.8, 118.2, 110.6, 108.5, 54.6, 53.1, 52.9, 36.6, 33.8, 27.4, 21.5, 10.1. **HRMS** (ESI) ( $m/z$ ) calculated for  $\text{C}_{18}\text{H}_{21}\text{INO}_4$  [ $\text{M}+\text{H}$ ] $^+$ : 442.0510, found: 442.0514.

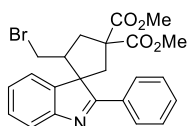

**dimethyl 2-(bromomethyl)-2'-phenylspiro[cyclopentane-1,3'-indole]-4,4-dicarboxylate (3a).** White solid. Mp: 150.9-152.2°C.  $^1\text{H NMR}$  (600 MHz, Chloroform-*d*)  $\delta$  8.23 (dd,  $J = 6.4, 3.1$  Hz, 2H), 7.70 (d,  $J = 7.7$  Hz, 1H), 7.53 – 7.49 (m, 3H), 7.40 (t,  $J = 8.1$  Hz, 2H), 7.28 – 7.23 (m, 1H), 3.87 (s, 3H), 3.81 (s, 3H), 3.64 (d,  $J = 15.6$  Hz, 1H), 3.49 – 3.40 (m, 1H), 3.04 (dd,  $J = 14.2, 6.5$  Hz, 1H), 2.81 (t,  $J = 13.6$  Hz, 1H), 2.73 (d,  $J = 15.5$  Hz, 1H), 2.64 (d,  $J = 7.3$  Hz, 2H).  $^{13}\text{C NMR}$  (125 MHz, Chloroform-*d*)  $\delta$  178.5, 173.0, 171.9, 153.6, 142.1, 132.2, 131.0, 128.8, 128.7, 128.4, 126.3, 122.7, 121.6, 66.9, 58.5, 53.5, 53.3, 50.3, 42.3, 40.1, 30.8. **HRMS** (ESI) ( $m/z$ ): calculated for  $\text{C}_{23}\text{H}_{23}\text{BrNO}_4$  [ $\text{M}+\text{H}$ ] $^+$ : 456.0805, found: 456.0817.

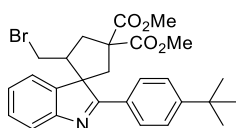

**dimethyl 2-(bromomethyl)-2'-(4-(tert-butyl)phenyl)spiro[cyclopentane-1,3'-indole]-4,4-dicarboxylate (3b).** White solid. Mp: 128.3-130.8°C.  $^1\text{H NMR}$  (600 MHz, Chloroform-*d*)  $\delta$  8.22 (d,  $J = 8.5$  Hz, 2H), 7.69 (d,  $J = 7.7$  Hz, 1H), 7.55 – 7.50 (m, 2H), 7.39 (t,  $J = 7.6$  Hz, 2H), 7.23 (td,  $J = 7.5, 1.1$  Hz, 1H), 3.90 (s, 3H), 3.82 (s, 3H), 3.68 (d,  $J = 15.6$  Hz, 1H), 3.52 – 3.43 (m, 1H), 3.05 (dd,  $J = 14.2, 6.5$  Hz, 1H), 2.83 (dd,  $J = 14.2, 13.1$  Hz, 1H), 2.72 (d,  $J = 15.6$  Hz, 1H), 2.65 – 2.59 (m, 2H), 1.38 (s, 9H).  $^{13}\text{C NMR}$  (125 MHz, Chloroform-*d*)  $\delta$  178.2, 173.2, 172.0, 154.5, 142.0, 128.7, 128.3, 126.1, 125.8, 122.7, 121.3, 66.8, 58.5, 53.5, 53.3, 50.5, 42.5, 40.1, 35.0, 31.1, 31.0. **HRMS** (ESI) ( $m/z$ ) calculated for  $\text{C}_{27}\text{H}_{31}\text{BrNO}_4$  [ $\text{M}+\text{H}$ ] $^+$ : 512.1431, found: 512.1422.

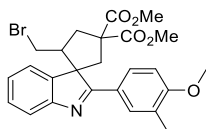

**dimethyl 2-(bromomethyl)-2'-(4-methoxy-3-methylphenyl)spiro[cyclopentane-1,3'-indole]-4,4-dicarboxylate (3c).** White solid. Mp: 134.3-135.1°C.  $^1\text{H NMR}$  (600 MHz, Chloroform-*d*)  $\delta$  8.16 – 8.12 (m, 2H), 7.65 (d,  $J = 7.18$  Hz, 1H), 7.38 (t,  $J = 7.14$  Hz, 2H), 7.23 – 7.19 (m, 1H), 6.93 (d,  $J = 8.47$  Hz, 1H), 3.91 (d,  $J = 9.10$  Hz, 6H), 3.82 (s,

3H), 3.67 (d,  $J = 15.63$  Hz, 1H), 3.48 – 3.41 (m, 1H), 3.04 (dd,  $J = 14.22, 6.53$  Hz, 1H), 2.83 (t,  $J = 13.68$  Hz, 1H), 2.72 (d,  $J = 15.63$  Hz, 1H), 2.65 – 2.58 (m, 2H), 2.32 (s, 3H).  $^{13}\text{C NMR}$  (150 MHz, Chloroform-*d*)  $\delta$  178.0, 173.3, 172.0, 160.3, 153.8, 142.0, 131.0, 128.6, 127.8, 127.3, 125.7, 124.0, 122.7, 121.0, 109.7, 66.6, 58.5, 55.5, 53.6, 53.3, 51.0, 42.8, 40.1, 31.1, 16.3. **HRMS** (ESI) ( $m/z$ ) calculated for  $\text{C}_{25}\text{H}_{27}\text{BrNO}_5$  [ $\text{M}+\text{H}$ ] $^+$ : 500.1067, found: 500.1080.

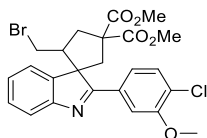

**dimethyl 2-(bromomethyl)-2'-(4-chloro-3-methoxyphenyl)spiro[cyclopentane-1,3'-indole]-4,4-dicarboxylate (3d)**. White solid. Mp: 189.9-191.9°C.  $^1\text{H NMR}$  (400 MHz, Chloroform-*d*)  $\delta$  7.99 (d,  $J = 1.9$  Hz, 1H), 7.79 (dd,  $J = 8.3, 2.0$  Hz, 1H), 7.72 (d,  $J = 7.6$  Hz, 1H), 7.53 (d,  $J = 8.3$  Hz, 1H), 7.43 (ddd,  $J = 8.7, 7.3, 1.2$  Hz, 2H), 7.32 – 7.25 (m, 1H), 4.09 (s, 3H), 3.89 (s, 3H), 3.84 (s, 3H), 3.67 (d,  $J = 15.5$  Hz, 1H), 3.48 – 3.37 (m, 1H), 3.00 (dd,  $J = 14.2, 6.7$  Hz, 1H), 2.88 (dd,  $J = 14.2, 13.1$  Hz, 1H), 2.72 – 2.61 (m, 3H).  $^{13}\text{C NMR}$  (125 MHz, Chloroform-*d*)  $\delta$  177.0, 172.7, 171.4, 155.0, 141.6, 131.4, 129.8, 128.4, 126.1, 125.5, 122.3, 121.2, 120.8, 111.5, 66.4, 57.9, 56.2, 53.1, 52.9, 50.1, 42.0, 39.6, 30.1. **HRMS** (ESI) ( $m/z$ ) calculated for  $\text{C}_{24}\text{H}_{24}\text{BrClNO}_5$  [ $\text{M}+\text{H}$ ] $^+$ : 520.0521, found: 520.0530.

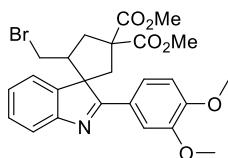

**dimethyl 2-(bromomethyl)-2'-(3,4-dimethoxyphenyl)spiro[cyclopentane-1,3'-indole]-4,4-dicarboxylate (3e)**. White solid. Mp: 147.8-149.3°C.  $^1\text{H NMR}$  (600 MHz, Chloroform-*d*)  $\delta$  7.97 (d,  $J = 2.1$  Hz, 1H), 7.84 (dd,  $J = 8.5, 2.1$  Hz, 1H), 7.67 (d,  $J = 7.7$  Hz, 1H), 7.41 – 7.35 (m, 2H), 7.22 (td,  $J = 7.5, 1.1$  Hz, 1H), 6.97 (d,  $J = 8.4$  Hz, 1H), 4.04 (s, 3H), 3.97 (s, 3H), 3.89 (s, 3H), 3.82 (s, 3H), 3.69 (d,  $J = 15.5$  Hz, 1H), 3.50 – 3.38 (m, 1H), 3.01 (dd,  $J = 14.3, 6.6$  Hz, 1H), 2.87 (dd,  $J = 14.3, 13.1$  Hz, 1H), 2.69 (d,  $J = 15.6$  Hz, 1H), 2.66 – 2.58 (m, 2H).  $^{13}\text{C NMR}$  (125 MHz, Chloroform-*d*)  $\delta$  177.2, 172.9, 171.5, 151.4, 148.9, 141.6, 128.2, 125.4, 124.5, 122.2, 121.4, 120.7, 110.9, 109.9, 66.2, 58.0, 55.8, 55.6, 53.1, 52.9, 50.6, 42.5, 39.6, 30.4. **HRMS** (ESI) ( $m/z$ ) calculated for  $\text{C}_{25}\text{H}_{27}\text{BrNO}_6$  [ $\text{M}+\text{H}$ ] $^+$ : 516.1016, found: 516.1028.

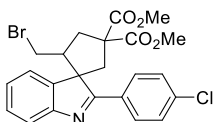

**dimethyl 2-(bromomethyl)-2'-(4-chlorophenyl)spiro[cyclopentane-1,3'-indole]-4,4-dicarboxylate (3f)**. Yellow oil.  $^1\text{H NMR}$  (400 MHz, Chloroform-*d*)  $\delta$  8.27 (d,  $J = 8.67$  Hz, 2H), 7.72 (d,  $J = 7.39$  Hz, 1H), 7.54 – 7.50 (m, 2H), 7.45 – 7.40 (m, 3H), 3.90 (s, 3H), 3.83 (s, 3H), 3.63 (d,  $J = 15.53$  Hz, 1H), 3.45 (t,  $J = 7.94$  Hz, 1H), 3.42 – 3.35 (m, 1H), 3.04 – 2.96 (m, 2H), 2.68 – 2.63 (m, 2H).  $^{13}\text{C NMR}$  (100 MHz, Chloroform-*d*)  $\delta$  178.5, 177.4, 173.1, 172.5,



171.8, 171.4, 145.4, 142.0, 137.4, 133.7, 130.4, 130.2, 129.8, 129.7, 129.2, 129.1, 128.8, 128.6, 127.3, 126.6, 122.7, 121.7, 121.6, 121.0, 66.7, 66.2, 59.6, 58.4, 53.6, 53.4, 53.4, 52.4, 50.4, 42.3, 42.3, 40.3, 40.1, 30.5, 30.2, 23.5. **HRMS** (ESI) (m/z) calculated for C<sub>23</sub>H<sub>22</sub>BrClNO<sub>4</sub> [M+H]<sup>+</sup>: 490.0415, found: 490.0423.

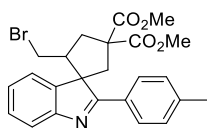

**dimethyl 2-(bromomethyl)-2'-(p-tolyl)spiro[cyclopentane-1,3'-indole]-4,4-dicarboxylate (3g)**. Colorless oil. **<sup>1</sup>H NMR** (400 MHz, Chloroform-*d*)  $\delta$  8.18 (d, *J* = 8.10 Hz, 2H), 7.75 – 7.68 (m, 1H), 7.41 (t, *J* = 7.03 Hz, 2H), 7.35 (d, *J* = 8.02 Hz, 2H), 7.29 – 7.23 (m, 1H), 3.91 (s, 3H), 3.84 (s, 3H), 3.66 (d, *J* = 15.55 Hz, 1H), 3.51 – 3.39 (m, 1H), 3.06 (dd, *J* = 14.11, 6.49 Hz, 1H), 2.83 (t, *J* = 13.64 Hz, 1H), 2.75 (d, *J* = 15.54 Hz, 1H), 2.65 (d, *J* = 7.20 Hz, 2H), 2.45 (s, 3H). **<sup>13</sup>C NMR** (100 MHz, Chloroform-*d*)  $\delta$  178.5, 173.0, 172.0, 142.0, 129.6, 128.7, 128.4, 126.1, 122.7, 121.3, 66.7, 58.5, 53.5, 53.3, 50.6, 42.5, 40.1, 30.8, 21.5. **HRMS** (ESI) (m/z) calculated for C<sub>24</sub>H<sub>25</sub>BrNO<sub>4</sub> [M+H]<sup>+</sup>: 470.0961, found: 470.0955.

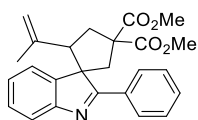

**dimethyl 2'-phenyl-2-(prop-1-en-2-yl)spiro[cyclopentane-1,3'-indole]-4,4-dicarboxylate (5a)**. White solid. Mp: 123.5–125.4°C. **<sup>1</sup>H NMR** (400 MHz, Chloroform-*d*)  $\delta$  8.37 – 8.28 (m, 2H), 7.69 (d, *J* = 7.6 Hz, 1H), 7.56 – 7.49 (m, 3H), 7.43 (d, *J* = 7.5 Hz, 1H), 7.38 (td, *J* = 7.6, 1.2 Hz, 1H), 7.24 (td, *J* = 7.5, 1.1 Hz, 1H), 4.48 (dq, *J* = 18.9, 1.3 Hz, 2H), 3.89 (s, 3H), 3.83 (s, 3H), 3.77 (dd, *J* = 13.6, 6.2 Hz, 1H), 3.60 (d, *J* = 15.5 Hz, 1H), 3.19 (t, *J* = 13.8 Hz, 1H), 2.78 – 2.72 (m, 1H), 2.69 (d, *J* = 15.7 Hz, 1H), 1.11 (s, 3H). **<sup>13</sup>C NMR** (100 MHz, Chloroform-*d*)  $\delta$  179.6, 173.4, 172.3, 144.0, 141.3, 130.8, 128.8, 128.5, 128.1, 125.9, 123.2, 121.1, 112.5, 66.9, 58.4, 53.9, 53.4, 53.2, 42.0, 38.5, 21.7. **HRMS** (ESI) (m/z) calculated for C<sub>25</sub>H<sub>26</sub>NO<sub>4</sub> [M+H]<sup>+</sup>: 404.1856, found: 404.1858.

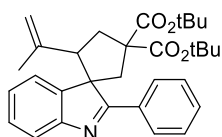

**di-tert-butyl 2'-phenyl-2-(prop-1-en-2-yl)spiro[cyclopentane-1,3'-indole]-4,4-dicarboxylate (5b)**. Colorless oil. **<sup>1</sup>H NMR** (400 MHz, Chloroform-*d*)  $\delta$  8.37 (dd, *J* = 7.0, 2.8 Hz, 2H), 7.69 (d, *J* = 7.7 Hz, 1H), 7.51 (t, *J* = 3.1 Hz, 3H), 7.45 (d, *J* = 7.5 Hz, 1H), 7.37 (td, *J* = 7.62, 1.25 Hz, 1H), 7.23 (td, *J* = 7.51, 1.20 Hz, 1H), 4.51 – 4.40 (m, 2H), 3.76 (dd, *J* = 13.7, 6.3 Hz, 1H), 3.48 (d, *J* = 15.5 Hz, 1H), 3.07 (t, *J* = 13.7 Hz, 1H), 2.70–2.56 (m, 2H), 1.58 (d, *J* = 1.6 Hz, 9H), 1.51 (d, *J* = 1.6 Hz, 9H), 1.10 (s, 3H). **<sup>13</sup>C NMR** (100 MHz, Chloroform-*d*)  $\delta$  179.7, 172.1, 171.0, 144.3, 141.7, 130.7, 128.7, 128.6, 127.9, 126.0, 123.3, 120.9, 112.3, 82.1, 82.0, 67.2, 59.9, 54.2, 41.7, 38.2, 29.7, 27.9, 27.8, 21.8. **HRMS** (ESI) (m/z) calculated for C<sub>31</sub>H<sub>38</sub>NO<sub>4</sub> [M+H]<sup>+</sup>: 488.2795, found: 488.2794.

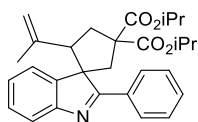

**diisopropyl 2'-phenyl-2-(prop-1-en-2-yl)spiro[cyclopentane-1,3'-indole]-4,4-dicarboxylate (5c).** Colorless oil.  $^1\text{H NMR}$  (400 MHz, Chloroform-*d*)  $\delta$  8.39 – 8.31 (m, 2H), 7.68 (d,  $J = 7.7$  Hz, 1H), 7.55 – 7.45 (m, 4H), 7.37 (t,  $J = 7.6$  Hz, 1H), 7.23 (t,  $J = 7.5$  Hz, 1H), 5.3 – 5.1 (m, 2H), 4.47 (d,  $J = 17.8$  Hz, 2H), 3.77 (dd,  $J = 13.7, 6.2$  Hz, 1H), 3.58 (d,  $J = 15.4$  Hz, 1H), 3.18 (t,  $J = 13.7$  Hz, 1H), 2.70 – 2.66 (m, 1H), 2.65 – 2.59 (m, 1H), 1.36 – 1.29 (m, 9H), 1.23 (d,  $J = 6.3$  Hz, 3H), 1.11 (s, 3H).  $^{13}\text{C NMR}$  (100 MHz, Chloroform-*d*)  $\delta$  179.8, 172.6, 171.5, 153.5, 144.2, 141.6, 133.0, 130.8, 128.8, 128.6, 128.1, 125.9, 123.4, 121.1, 112.5, 69.9, 69.7, 67.2, 58.8, 54.1, 42.0, 38.4, 29.8, 21.8, 21.7, 21.7. **HRMS** (ESI) ( $m/z$ ) calculated for  $\text{C}_{29}\text{H}_{34}\text{NO}_4$   $[\text{M}+\text{H}]^+$ : 460.2482, found: 460.2480.

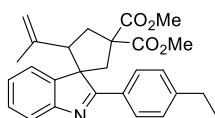

**dimethyl 2'-(4-ethylphenyl)-2-(prop-1-en-2-yl)spiro[cyclopentane-1,3'-indole]-4,4-dicarboxylate (5d).** Colorless oil.  $^1\text{H NMR}$  (600 MHz, Chloroform-*d*)  $\delta$  8.21 (d,  $J = 8.1$  Hz, 2H), 7.63 (d,  $J = 7.6$  Hz, 1H), 7.38 (d,  $J = 7.5$  Hz, 1H), 7.32 (d,  $J = 7.9$  Hz, 3H), 7.18 (t,  $J = 7.4$  Hz, 1H), 4.46 (s, 1H), 4.42 (s, 1H), 3.86 (s, 3H), 3.79 (s, 3H), 3.77 – 3.69 (m, 1H), 3.55 (d,  $J = 15.6$  Hz, 1H), 3.15 (t,  $J = 13.7$  Hz, 1H), 2.73 – 2.64 (m, 4H), 1.28 (t,  $J = 7.6$  Hz, 3H), 1.07 (s, 3H).  $^{13}\text{C NMR}$  (150 MHz, Chloroform-*d*)  $\delta$  179.6, 173.4, 172.3, 153.5, 147.3, 143.9, 141.4, 130.2, 128.5, 128.3, 128.2, 128.0, 125.6, 123.2, 120.9, 112.4, 66.8, 58.4, 54.0, 53.4, 53.2, 42.2, 38.5, 28.8, 21.7, 15.2. **HRMS** (ESI) ( $m/z$ ) calculated for  $\text{C}_{27}\text{H}_{30}\text{NO}_4$   $[\text{M}+\text{H}]^+$ : 432.2169, found: 432.2162.

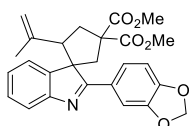

**dimethyl 2'-(benzo[d][1,3]dioxol-5-yl)-2-(prop-1-en-2-yl)spiro[cyclopentane-1,3'-indole]-4,4-dicarboxylate (5e).** Colorless oil.  $^1\text{H NMR}$  (400 MHz, Chloroform-*d*)  $\delta$  7.93 – 7.86 (m, 2H), 7.66 – 7.59 (m, 1H), 7.40 (d,  $J = 7.5$  Hz, 1H), 7.35 (td,  $J = 7.6, 1.2$  Hz, 1H), 7.20 (td,  $J = 7.5, 1.1$  Hz, 1H), 6.95 (d,  $J = 8.8$  Hz, 1H), 6.07 (q,  $J = 1.4$  Hz, 2H), 4.52 – 4.43 (m, 2H), 3.91 (s, 3H), 3.83 (s, 3H), 3.70 (dd,  $J = 13.6, 6.1$  Hz, 1H), 3.56 (d,  $J = 15.56$  Hz, 1H), 3.20 (t,  $J = 13.8$  Hz, 1H), 2.75 – 2.62 (m, 2H), 1.10 (s, 3H).  $^{13}\text{C NMR}$  (100 MHz, Chloroform-*d*)  $\delta$  178.7, 173.5, 172.3, 153.4, 149.8, 148.2, 143.9, 141.3, 128.1, 127.1, 125.5, 123.5, 123.1, 120.8, 112.5, 108.6, 108.2, 101.6, 66.7, 58.4, 54.3, 53.4, 53.2, 42.3, 38.4, 21.7. **HRMS** (ESI) ( $m/z$ ) calculated for  $\text{C}_{26}\text{H}_{26}\text{NO}_6$   $[\text{M}+\text{H}]^+$ : 448.1755, found: 448.1742.

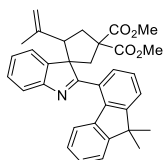

**dimethyl 2'-(9,9-dimethyl-9H-fluoren-4-yl)-2-(prop-1-en-2-yl)spiro[cyclopentane-1,3'-indole]-4,4-dicarboxylate (5f).** Colorless oil.  $^1\text{H NMR}$  (400 MHz, Chloroform-*d*)  $\delta$  8.57 (d,  $J = 1.7$  Hz, 1H), 8.38 (dd,  $J = 8.1,$

1.7 Hz, 1H), 7.88 (d,  $J = 8.1$  Hz, 1H), 7.85 – 7.78 (m, 1H), 7.72 (d,  $J = 7.6$  Hz, 1H), 7.54 – 7.49 (m, 1H), 7.47 (d,  $J = 7.5$  Hz, 1H), 7.43 – 7.35 (m, 3H), 7.24 (td,  $J = 7.5, 1.2$  Hz, 1H), 4.54 – 4.45 (m, 2H), 3.94 (s, 3H), 3.89 – 3.80 (m, 4H), 3.76 (d,  $J = 15.5$  Hz, 1H), 3.30 (t,  $J = 13.8$  Hz, 1H), 2.80 – 2.64 (m, 2H), 1.64 (d,  $J = 6.7$  Hz, 6H), 1.13 (s, 3H).  $^{13}\text{C}$  NMR (100 MHz, Chloroform-*d*)  $\delta$  179.6, 173.6, 172.4, 154.7, 154.2, 153.6, 144.0, 141.8, 141.4, 138.4, 131.7, 128.1, 128.1, 127.8, 127.1, 125.7, 123.2, 122.9, 122.8, 121.0, 120.6, 120.1, 112.6, 67.1, 58.4, 54.3, 53.4, 53.2, 47.3, 42.3, 38.4, 27.0, 27.0, 21.7. HRMS (ESI) ( $m/z$ ) calculated for  $\text{C}_{34}\text{H}_{34}\text{NO}_4$   $[\text{M}+\text{H}]^+$ : 520.2482, found: 520.2483.

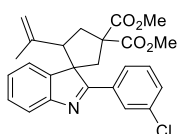

**dimethyl 2'-(3-chlorophenyl)-2-(prop-1-en-2-yl)spiro[cyclopentane-1,3'-indole]-4,4-dicarboxylate (5g).** Colorless oil.  $^1\text{H}$  NMR (600 MHz, Chloroform-*d*)  $\delta$  8.32 (t,  $J = 1.9$  Hz, 1H), 8.23 (dt,  $J = 7.4, 1.6$  Hz, 1H), 7.67 (d,  $J = 7.6$  Hz, 1H), 7.50 – 7.44 (m, 2H), 7.41 (d,  $J = 7.4$  Hz, 1H), 7.37 (td,  $J = 7.6, 1.1$  Hz, 1H), 7.24 (td,  $J = 7.5, 1.0$  Hz, 1H), 4.49 (t,  $J = 1.3$  Hz, 1H), 4.43 (s, 1H), 3.91 (s, 3H), 3.81 (s, 3H), 3.70 (dd,  $J = 13.7, 6.1$  Hz, 1H), 3.53 (d,  $J = 15.6$  Hz, 1H), 3.18 (t,  $J = 13.8$  Hz, 1H), 2.71 (dd,  $J = 13.9, 6.2$  Hz, 1H), 2.66 (d,  $J = 15.6$  Hz, 1H), 1.07 (s, 3H).  $^{13}\text{C}$  NMR (100 MHz, Chloroform-*d*)  $\delta$  178.1, 173.3, 172.2, 153.0, 143.9, 141.0, 134.9, 134.4, 130.7, 130.0, 128.4, 128.2, 126.6, 126.3, 123.2, 121.3, 112.8, 66.9, 58.4, 53.9, 53.6, 53.3, 41.8, 38.4, 21.7. HRMS (ESI) ( $m/z$ ) calculated for  $\text{C}_{25}\text{H}_{25}\text{ClNO}_4$   $[\text{M}+\text{H}]^+$ : 438.1467, found: 438.1463.

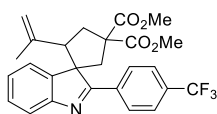

**dimethyl 2-(prop-1-en-2-yl)-2'-(4-(trifluoromethyl)phenyl)spiro[cyclopentane-1,3'-indole]-4,4-dicarboxylate (5h).** Colorless oil.  $^1\text{H}$  NMR (400 MHz, Chloroform-*d*)  $\delta$  8.49 (d,  $J = 8.2$  Hz, 2H), 7.78 (d,  $J = 8.3$  Hz, 2H), 7.69 (d,  $J = 7.6$  Hz, 1H), 7.44 (d,  $J = 7.5$  Hz, 1H), 7.38 (td,  $J = 7.6, 1.2$  Hz, 1H), 7.29 – 7.21 (m, 1H), 4.49 (q,  $J = 1.3$  Hz, 1H), 4.41 (d,  $J = 1.5$  Hz, 1H), 3.88 (s, 3H), 3.82 (s, 3H), 3.74 – 3.65 (m, 1H), 3.60 (d,  $J = 15.5$  Hz, 1H), 3.26 (t,  $J = 13.9$  Hz, 1H), 2.66 (dd,  $J = 14.0, 6.2$  Hz, 1H), 2.60 (d,  $J = 15.6$  Hz, 1H), 1.07 (s, 3H).  $^{13}\text{C}$  NMR (125 MHz, Chloroform-*d*)  $\delta$  177.9, 173.5, 172.2, 153.2, 144.0, 140.9, 136.0, 132.1 (q,  $J = 101.52, 0.00$  Hz), 128.8, 128.3, 126.5, 125.6 (q,  $J = 3.82$  Hz), 123.9 (q,  $J = 272.32$  Hz), 123.3, 121.6, 112.9, 67.1, 58.3, 53.7, 53.5, 53.2, 41.7, 38.4, 21.6. HRMS (ESI) ( $m/z$ ) calculated for  $\text{C}_{26}\text{H}_{25}\text{F}_3\text{NO}_4$   $[\text{M}+\text{H}]^+$ : 472.1730, found: 472.1735.

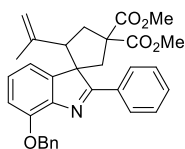

**dimethyl 7'-(benzyloxy)-2'-phenyl-2-(prop-1-en-2-yl)spiro[cyclopentane-1,3'-indole]-4,4-dicarboxylate (5i).** Colorless oil.  $^1\text{H}$  NMR (400 MHz, Chloroform-*d*)  $\delta$  8.38 – 8.32 (m, 2H), 7.58 – 7.48 (m, 5H), 7.39 (t,  $J = 7.4$  Hz, 2H), 7.32 (t,  $J = 7.2$  Hz, 1H), 7.12 (t,  $J = 7.8$  Hz, 1H), 7.04 (d,  $J = 7.5$  Hz, 1H), 6.92 (d,  $J = 8.0$  Hz, 1H), 5.46 (s, 2H),

4.51 (s, 1H), 4.46 (s, 1H), 3.89 (s, 3H), 3.82 (s, 3H), 3.80 – 3.73 (m, 1H), 3.58 (d,  $J = 15.5$  Hz, 1H), 3.17 (t,  $J = 13.7$  Hz, 1H), 2.77 – 2.65 (m, 2H), 1.13 (s, 3H).  $^{13}\text{C NMR}$  (125 MHz, Chloroform- $d$ )  $\delta$  179.1, 174.8, 173.7, 152.4, 147.9, 143.8, 142.8, 139.0, 134.4, 131.8, 130.0, 129.9, 129.2, 128.9, 128.4, 117.6, 115.7, 113.8, 73.1, 68.5, 59.9, 55.3, 54.8, 54.6, 43.5, 39.8, 23.2. **HRMS** (ESI) ( $m/z$ ) calculated for  $\text{C}_{32}\text{H}_{32}\text{NO}_5$   $[\text{M}+\text{H}]^+$ : 510.2275, found: 510.2277.

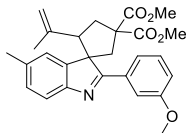

**dimethyl 2'-(3-methoxyphenyl)-5'-methyl-2-(prop-1-en-2-yl)spiro[cyclopentane-1,3'-indole]-4,4-dicarboxylate (5j).** Colorless oil.  $^1\text{H NMR}$  (600 MHz, Chloroform- $d$ )  $\delta$  7.84 – 7.79 (m, 2H), 7.53 (d,  $J = 7.7$  Hz, 1H), 7.42 – 7.37 (m, 1H), 7.20 (s, 1H), 7.15 (d,  $J = 7.9$  Hz, 1H), 7.05 – 7.01 (m, 1H), 4.50 – 4.47 (m, 1H), 4.44 (s, 1H), 3.91 (s, 3H), 3.87 (s, 3H), 3.81 (s, 3H), 3.74 (dd,  $J = 13.5, 6.0$  Hz, 1H), 3.54 (d,  $J = 15.5$  Hz, 1H), 3.12 (t,  $J = 13.7$  Hz, 1H), 2.72 (dd,  $J = 13.8, 6.2$  Hz, 1H), 2.68 (d,  $J = 15.6$  Hz, 1H), 2.41 (s, 3H), 1.10 (s, 3H).  $^{13}\text{C NMR}$  (100 MHz, Chloroform- $d$ )  $\delta$  178.5, 173.3, 172.3, 159.8, 151.3, 144.2, 141.5, 135.7, 134.3, 129.6, 128.7, 124.0, 120.8, 120.7, 116.6, 113.4, 112.4, 66.8, 58.5, 55.5, 53.8, 53.4, 53.2, 42.2, 38.5, 21.9, 21.8. **HRMS** (ESI) ( $m/z$ ) calculated for  $\text{C}_{27}\text{H}_{30}\text{NO}_5$   $[\text{M}+\text{H}]^+$ : 448.2118, found: 448.2117.

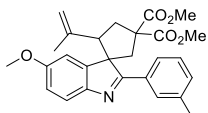

**dimethyl 5'-methoxy-2-(prop-1-en-2-yl)-2'-(m-tolyl)spiro[cyclopentane-1,3'-indole]-4,4-dicarboxylate (5k).** Colorless oil.  $^1\text{H NMR}$  (400 MHz, Chloroform- $d$ )  $\delta$  8.13 (s, 1H), 8.05 (d,  $J = 7.9$  Hz, 1H), 7.58 (d,  $J = 8.5$  Hz, 1H), 7.40 (t,  $J = 7.7$  Hz, 1H), 7.31 (d,  $J = 7.7$  Hz, 1H), 7.04 (d,  $J = 2.5$  Hz, 1H), 6.90 (dd,  $J = 8.5, 2.5$  Hz, 1H), 4.55 – 4.47 (m, 2H), 3.92 – 3.80 (m, 9H), 3.77 (dd,  $J = 13.7, 6.2$  Hz, 1H), 3.60 (d,  $J = 15.5$  Hz, 1H), 3.16 (t,  $J = 13.8$  Hz, 1H), 2.73 (dd,  $J = 13.9, 6.3$  Hz, 1H), 2.66 (d,  $J = 15.5$  Hz, 1H), 2.47 (s, 3H), 1.14 (s, 3H).  $^{13}\text{C NMR}$  (125 MHz, Chloroform- $d$ )  $\delta$  177.6, 173.3, 172.4, 158.3, 147.3, 145.6, 141.5, 138.4, 132.8, 131.2, 128.8, 128.5, 125.2, 121.3, 112.8, 112.4, 110.0, 67.1, 58.4, 55.7, 53.8, 53.3, 53.2, 42.3, 38.3, 21.8, 21.5. **HRMS** (ESI) ( $m/z$ ) calculated for  $\text{C}_{27}\text{H}_{30}\text{NO}_5$   $[\text{M}+\text{H}]^+$ : 448.2118, found: 448.2120.

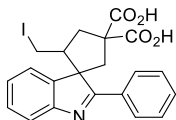

**2-(iodomethyl)-2'-phenylspiro[cyclopentane-1,3'-indole]-4,4-dicarboxylic acid (6).** Yellow solid. Mp: 149.1–151.3.  $^1\text{H NMR}$  (600 MHz, DMSO- $d_6$ )  $\delta$  8.22 – 8.17 (m, 2H), 7.69 (d,  $J = 7.6$  Hz, 1H), 7.60 – 7.56 (m, 1H), 7.56 – 7.51 (m, 2H), 7.48 – 7.41 (m, 2H), 7.32 (td,  $J = 7.5, 1.1$  Hz, 1H), 3.40 (d,  $J = 15.4$  Hz, 1H), 3.33 – 3.25 (m, 1H), 2.92 (dd,  $J = 13.9, 6.6$  Hz, 1H), 2.69 – 2.58 (m, 2H), 2.53 (d,  $J = 9.7$  Hz, 1H), 2.36 (dd,  $J = 10.0, 5.5$  Hz, 1H).  $^{13}\text{C NMR}$  (150 MHz, DMSO- $d_6$ )  $\delta$  179.0, 174.5, 172.9, 152.8, 142.4, 132.0, 131.8, 129.3, 129.0, 128.8, 128.7, 126.8, 123.5,

121.2, 67.0, 58.3, 51.0, 42.7, 41.4, 3.3. **HRMS** (ESI) (m/z) calculated for C<sub>21</sub>H<sub>19</sub>INO<sub>4</sub> [M+H]<sup>+</sup>: 476.0353, found: 476.0355.

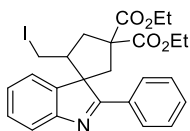

**diethyl 2-(iodomethyl)-2'-phenylspiro[cyclopentane-1,3'-indole]-4,4-dicarboxylate (7)**. Colorless oil. **<sup>1</sup>H NMR** (600 MHz, Chloroform-*d*)  $\delta$  8.22 (q,  $J = 6.75, 3.06$  Hz, 2H), 7.69 (d,  $J = 7.68$  Hz, 1H), 7.52 – 7.49 (m, 3H), 7.44 – 7.37 (m, 2H), 7.25 (t,  $J = 7.26$  Hz, 1H), 4.38 – 4.24 (m, 4H), 3.65 (d,  $J = 15.59$  Hz, 1H), 3.44 – 3.34 (m, 1H), 3.07 (dd,  $J = 14.08, 6.35$  Hz, 1H), 2.81 – 2.71 (m, 2H), 2.42 (dd,  $J = 10.08, 4.07$  Hz, 1H), 2.35 (t,  $J = 10.35$  Hz, 1H), 1.33 (t,  $J = 7.03$  Hz, 3H), 1.28 (t,  $J = 7.14$  Hz, 3H). **<sup>13</sup>C NMR** (125 MHz, Chloroform-*d*)  $\delta$  180.0, 174.0, 172.9, 155.2, 143.5, 133.6, 132.3, 130.2, 130.1, 129.8, 127.7, 124.3, 122.9, 68.5, 63.8, 63.6, 59.6, 52.3, 43.8, 42.7, 15.5, 15.5, 3.6. **HRMS** (ESI) (m/z) calculated for C<sub>25</sub>H<sub>27</sub>INO<sub>4</sub> [M+H]<sup>+</sup>: 532.0979, found: 532.0986.

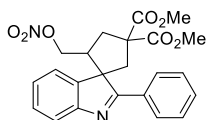

**dimethyl 2-((nitrooxy)methyl)-2'-phenylspiro[cyclopentane-1,3'-indole]-4,4-dicarboxylate (8)**. White solid. Mp: 93.4–95.4°C. **<sup>1</sup>H NMR** (400 MHz, Chloroform-*d*)  $\delta$  8.24 (dd,  $J = 6.79, 3.06$  Hz, 2H), 7.74 (d,  $J = 7.75$  Hz, 1H), 7.57 – 7.49 (m, 3H), 7.45 (d,  $J = 7.49$  Hz, 2H), 7.28 (t,  $J = 7.51$  Hz, 1H), 3.89 (s, 3H), 3.88 – 3.81 (m, 4H), 3.77 – 3.64 (m, 2H), 3.44 – 3.31 (m, 1H), 2.88 (d,  $J = 10.30$  Hz, 2H), 2.70 (d,  $J = 15.53$  Hz, 1H). **<sup>13</sup>C NMR** (150 MHz, Chloroform-*d*)  $\delta$  178.3, 172.8, 171.8, 153.6, 142.0, 132.0, 131.1, 129.0, 128.9, 128.4, 126.5, 122.6, 121.8, 72.0, 65.5, 59.3, 53.6, 53.4, 45.1, 41.6, 38.1. **HRMS** (ESI) (m/z) calculated for C<sub>23</sub>H<sub>23</sub>N<sub>2</sub>O<sub>7</sub> [M+H]<sup>+</sup>: 439.1500, found: 439.1500.

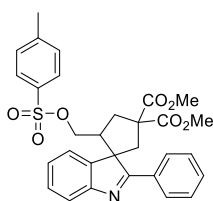

**dimethyl 2'-phenyl-2-((tosyloxy)methyl)spiro[cyclopentane-1,3'-indole]-4,4-dicarboxylate (9)**. Colorless oil. **<sup>1</sup>H NMR** (600 MHz, Chloroform-*d*)  $\delta$  8.02 – 7.97 (m, 2H), 7.55 (d,  $J = 7.71$  Hz, 1H), 7.44 – 7.37 (m, 3H), 7.35 – 7.31 (m, 2H), 7.28 (td,  $J = 7.60, 1.13$  Hz, 1H), 7.23 (d,  $J = 7.45$  Hz, 1H), 7.11 (dd,  $J = 7.45, 1.08$  Hz, 1H), 7.08 (d,  $J = 8.08$  Hz, 2H), 3.76 (s, 3H), 3.71 (s, 3H), 3.50 (d,  $J = 15.61$  Hz, 1H), 3.48 – 3.41 (m, 1H), 3.27 – 3.16 (m, 2H), 2.75 – 2.62 (m, 2H), 2.52 (d,  $J = 15.62$  Hz, 1H), 2.32 (s, 3H). **<sup>13</sup>C NMR** (125 MHz, Chloroform-*d*)  $\delta$  178.7, 172.8, 171.8, 153.4, 144.7, 141.9, 132.2, 132.2, 130.8, 129.7, 128.7, 128.6, 128.4, 127.6, 126.2, 122.6, 121.6, 68.8, 65.4, 59.0, 53.5, 53.3, 46.5, 41.9, 37.8, 21.6. **HRMS** (ESI) (m/z): calculated for C<sub>30</sub>H<sub>30</sub>NO<sub>7</sub>S [M+H]<sup>+</sup>: 548.1737, found: 548.1738.

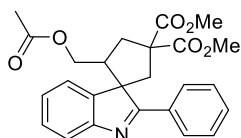

**dimethyl 2-(acetoxymethyl)-2'-phenylspiro[cyclopentane-1,3'-indole]-4,4-dicarboxylate (10).** Colorless oil.  $^1\text{H NMR}$  (400 MHz, Chloroform-*d*)  $\delta$  8.23 (ddd,  $J = 6.07, 2.96, 1.31$  Hz, 2H), 7.70 (d,  $J = 7.67$  Hz, 1H), 7.52 (ddd,  $J = 6.80, 2.99, 1.32$  Hz, 3H), 7.44 – 7.39 (m, 2H), 7.29 – 7.24 (m, 1H), 3.88 (d,  $J = 1.26$  Hz, 3H), 3.82 (d,  $J = 1.24$  Hz, 3H), 3.79 (d,  $J = 1.26$  Hz, 1H), 3.76 (dt,  $J = 6.31, 4.75$  Hz, 1H), 3.61 (dd,  $J = 15.53, 1.26$  Hz, 1H), 3.45 – 3.35 (m, 2H), 2.84 – 2.75 (m, 1H), 2.68 (dd,  $J = 15.52, 1.28$  Hz, 1H), 1.72 (d,  $J = 1.26$  Hz, 3H).  $^{13}\text{C NMR}$  (125 MHz, Chloroform-*d*)  $\delta$  178.6, 172.6, 171.5, 169.8, 153.3, 142.1, 132.1, 130.2, 128.4, 128.2, 128.1, 127.9, 127.6, 125.7, 122.3, 120.9, 65.3, 62.8, 58.7, 53.0, 52.8, 46.2, 41.5, 37.3, 19.8. **HRMS** (ESI) ( $m/z$ ): calculated for  $\text{C}_{25}\text{H}_{26}\text{NO}_6$  [ $\text{M}+\text{H}$ ] $^+$ : 436.1755, found: 436.1765.

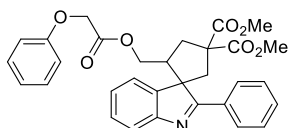

**dimethyl 2-((2-phenoxyacetoxy)methyl)-2'-phenylspiro[cyclopentane-1,3'-indole]-4,4-dicarboxylate (11).** Colorless oil.  $^1\text{H NMR}$  (400 MHz, Chloroform-*d*)  $\delta$  8.27 (dd,  $J = 6.78, 3.04$  Hz, 2H), 7.73 (d,  $J = 7.68$  Hz, 1H), 7.57 – 7.50 (m, 3H), 7.43 (t,  $J = 7.56$  Hz, 2H), 7.32 – 7.21 (m, 3H), 6.98 (t,  $J = 7.32$  Hz, 1H), 6.72 (d,  $J = 8.13$  Hz, 2H), 4.35 – 4.19 (m, 2H), 3.96 – 3.79 (m, 7H), 3.63 (d,  $J = 15.55$  Hz, 1H), 3.55 – 3.41 (m, 2H), 2.83 (t,  $J = 13.34$  Hz, 1H), 2.77 – 2.67 (m, 2H).  $^{13}\text{C NMR}$  (100 MHz, Chloroform-*d*)  $\delta$  179.0, 173.0, 171.9, 168.1, 157.6, 142.4, 132.4, 130.9, 129.5, 128.9, 128.7, 128.4, 126.3, 122.8, 121.6, 121.5, 114.5, 65.7, 64.5, 64.0, 59.1, 53.5, 53.4, 46.9, 42.0, 37.5. **HRMS** (ESI) ( $m/z$ ): calculated for  $\text{C}_{31}\text{H}_{30}\text{NO}_7$  [ $\text{M}+\text{H}$ ] $^+$ : 528.2017, found: 528.2027.

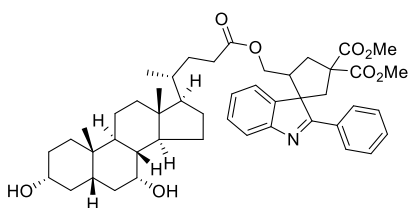

**dimethyl 2-((((R)-4-(((3R,5S,7R,8R,9S,10S,13R,14S,17R)-3,7-dihydroxy-10,13-dimethylhexadecahydro-1H-cyclopenta[a]phenanthren-17-yl)pentanoyl)oxy)methyl)-2'-phenylspiro[cyclopentane-1,3'-indole]-4,4-dicarboxylate (12).** White solid. Mp: 90.5-92.5°C.  $^1\text{H NMR}$  (600 MHz, Chloroform-*d*)  $\delta$  8.22 (dd,  $J = 5.33, 2.56$  Hz, 2H), 7.68 (d,  $J = 7.42$  Hz, 1H), 7.53 – 7.47 (m, 3H), 7.42 – 7.35 (m, 2H), 7.23 (t,  $J = 7.57$  Hz, 1H), 3.88 – 3.74 (m, 8H), 3.57 (dd,  $J = 15.55, 3.07$  Hz, 1H), 3.49 – 3.36 (m, 3H), 3.37 – 3.31 (m, 1H), 2.82 – 2.71 (m, 1H), 2.67 (d,  $J = 15.53$  Hz, 1H), 2.52 – 2.42 (m, 1H), 2.21 (q,  $J = 12.52$  Hz, 1H), 1.99 – 1.89 (m, 4H), 1.85 – 1.77 (m, 4H), 1.73 – 1.64 (m, 2H), 1.64 – 1.57 (m, 1H), 1.52 – 1.42 (m, 5H), 1.40 – 1.30 (m, 3H), 1.25 (dd,  $J = 11.99, 4.69$  Hz, 2H), 1.19 – 1.12 (m, 1H), 1.06 (ddd,  $J = 21.93, 12.02, 5.83$  Hz, 3H), 0.97 (td,  $J = 14.38, 13.98, 3.36$  Hz, 1H), 0.89 (s, 3H), 0.84 – 0.78 (m, 3H), 0.60 (d,  $J = 3.17$

Hz, 3H).  $^{13}\text{C}$  NMR (125 MHz, Chloroform-*d*)  $\delta$  179.1, 176.2, 174.9, 173.5, 173.0, 172.0, 153.7, 143.9, 142.6, 132.5, 130.7, 128.9, 128.7, 128.7, 128.5, 128.4, 128.3, 128.3, 128.2, 126.1, 123.0, 122.8, 121.4, 121.1, 72.0, 68.5, 65.8, 63.2, 59.2, 55.8, 55.7, 53.4, 53.3, 52.2, 50.4, 46.9, 43.3, 42.6, 42.1, 41.5, 39.9, 39.6, 39.4, 37.7, 35.4, 35.2, 35.1, 34.6, 34.6, 32.8, 30.7, 30.5, 30.5, 30.5, 28.1, 23.7, 22.8, 20.6, 18.2, 18.2, 11.8. **HRMS** (ESI) (*m/z*): calculated for  $\text{C}_{47}\text{H}_{62}\text{NO}_8$   $[\text{M}+\text{H}]^+$ : 768.4470, found: 768.4477.

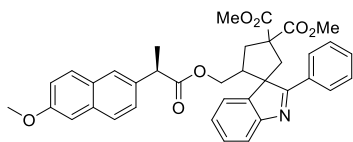

**dimethyl 2-(((R)-2-(6-methoxynaphthalen-2-yl)propanoyl)oxy)methyl)-2'-phenylspiro[cyclopentane-1,3'-indole]-4,4-dicarboxylate (13)**. Colorless oil.  $^1\text{H}$  NMR (600 MHz, Chloroform-*d*)  $\delta$  8.29 – 7.99 (m, 2H), 7.73 – 7.61 (m, 1H), 7.61 – 7.43 (m, 6H), 7.40 – 7.28 (m, 2H), 7.22 (ddd,  $J = 26.72, 7.53, 1.18$  Hz, 1H), 7.15 – 7.05 (m, 3H), 3.89 (s, 4H), 3.83 – 3.66 (m, 6H), 3.57 – 2.88 (m, 4H), 2.81 – 2.15 (m, 3H), 1.28 (dd,  $J = 45.62, 7.22$  Hz, 3H).  $^{13}\text{C}$  NMR (150 MHz, Chloroform-*d*)  $\delta$  179.0, 178.4, 173.5, 173.4, 172.6, 172.5, 171.5, 171.5, 157.1, 153.2, 142.1, 141.9, 134.9, 134.7, 133.2, 133.1, 132.2, 132.0, 130.3, 130.2, 128.9, 128.8, 128.4, 128.4, 128.3, 128.3, 128.1, 128.0, 127.8, 126.5, 126.5, 125.8, 125.7, 125.7, 125.6, 125.5, 125.4, 122.4, 122.3, 121.0, 120.9, 118.4, 118.4, 105.0, 65.3, 65.3, 63.3, 63.3, 58.6, 58.6, 54.9, 53.0, 52.9, 52.8, 46.4, 46.1, 44.6, 44.2, 41.8, 41.6, 37.2, 37.1, 17.6, 17.6. **HRMS** (ESI) (*m/z*): calculated for  $\text{C}_{37}\text{H}_{36}\text{NO}_7$   $[\text{M}+\text{H}]^+$ : 606.2486, found: 606.2488.

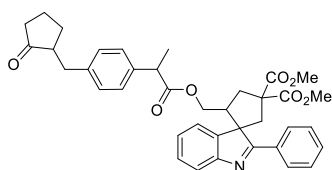

**dimethyl 2-(((2-(4-((2-oxocyclopentyl)methyl)phenyl)propanoyl)oxy)methyl)-2'-phenylspiro[cyclopentane-1,3'-indole]-4,4-dicarboxylate (14)**. White solid. Mp: 110.4-112.4°C.  $^1\text{H}$  NMR (400 MHz, Chloroform-*d*)  $\delta$  8.27 – 8.18 (m, 2H), 7.67 (dd,  $J = 18.85, 7.65$  Hz, 1H), 7.55 – 7.47 (m, 3H), 7.41 – 7.33 (m, 2H), 7.28 – 7.20 (m, 1H), 7.01 – 6.94 (m, 3H), 6.90 (d,  $J = 7.85$  Hz, 1H), 3.90 – 3.76 (m, 7H), 3.58 – 3.48 (m, 1H), 3.46 – 3.40 (m, 1H), 3.37 – 3.21 (m, 2H), 3.07 (dt,  $J = 13.45, 3.06$  Hz, 1H), 2.81 – 2.62 (m, 3H), 2.50 – 2.40 (m, 1H), 2.37 – 2.25 (m, 2H), 2.16 – 2.00 (m, 2H), 1.98 – 1.90 (m, 1H), 1.79 – 1.66 (m, 1H), 1.58 – 1.44 (m, 1H), 1.29 – 1.19 (m, 2H), 1.15 (d,  $J = 7.12$  Hz, 1H).  $^{13}\text{C}$  NMR (100 MHz, Chloroform-*d*)  $\delta$  220.3, 179.3, 178.8, 173.9, 173.8, 173.1, 173.0, 171.9, 171.9, 153.7, 142.6, 142.4, 138.7, 138.7, 138.0, 137.8, 132.4, 130.7, 130.6, 128.9, 128.9, 128.8, 128.7, 128.6, 128.5, 128.2, 127.5, 126.2, 126.1, 122.8, 122.8, 121.4, 121.3, 65.8, 65.7, 63.7, 63.6, 59.1, 59.0, 53.5, 53.4, 53.3, 51.0, 46.9, 46.6, 44.7, 44.3, 42.2, 42.1, 38.2, 37.6, 37.6, 35.2, 29.2, 20.5, 17.9. **HRMS** (ESI) (*m/z*): calculated for  $\text{C}_{38}\text{H}_{40}\text{NO}_7$   $[\text{M}+\text{H}]^+$ : 622.2799, found: 622.2798.

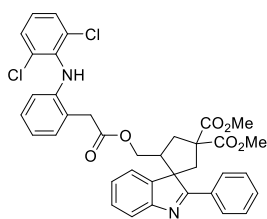

**dimethyl 2-((2-(2-((2,6-dichlorophenyl)amino)phenyl)acetoxy)methyl)-2'-phenylspiro[cyclopentane-1,3'-indole]-4,4-dicarboxylate (15).** Colorless oil.  $^1\text{H NMR}$  (600 MHz, Chloroform-*d*)  $\delta$  8.31 – 8.26 (m, 2H), 7.67 (d,  $J = 7.68$  Hz, 1H), 7.47 (dd,  $J = 8.36, 6.98$  Hz, 2H), 7.43 – 7.37 (m, 2H), 7.35 – 7.28 (m, 3H), 7.26 – 7.19 (m, 1H), 7.04 (td,  $J = 7.68, 1.59$  Hz, 1H), 6.99 – 6.92 (m, 2H), 6.84 (td,  $J = 7.43, 1.26$  Hz, 1H), 6.47 (s, 1H), 6.42 (d,  $J = 8.04$  Hz, 1H), 3.86 (s, 4H), 3.80 (s, 3H), 3.61 (d,  $J = 15.61$  Hz, 1H), 3.55 – 3.45 (m, 3H), 3.40 (d,  $J = 14.68$  Hz, 1H), 2.82 (t,  $J = 13.37$  Hz, 1H), 2.71 (dd,  $J = 14.06, 6.36$  Hz, 1H), 2.67 (d,  $J = 15.61$  Hz, 1H).  $^{13}\text{C NMR}$  (150 MHz, Chloroform-*d*)  $\delta$  178.6, 172.6, 171.5, 171.1, 142.2, 137.3, 130.4, 130.3, 129.2, 128.3, 128.3, 128.2, 128.0, 127.4, 125.8, 123.5, 123.4, 122.3, 121.4, 121.0, 117.5, 65.3, 63.7, 58.7, 53.1, 52.9, 46.3, 41.7, 37.3, 37.0. **HRMS** (ESI) ( $m/z$ ): calculated for  $\text{C}_{37}\text{H}_{33}\text{Cl}_2\text{N}_2\text{O}_6$   $[\text{M}+\text{H}]^+$ : 671.1710, found: 671.1717.

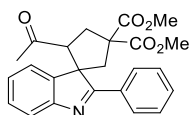

**dimethyl 2-acetyl-2'-phenylspiro[cyclopentane-1,3'-indole]-4,4-dicarboxylate (16).** Colorless oil.  $^1\text{H NMR}$  (400 MHz, Chloroform-*d*)  $\delta$  8.32 – 8.26 (m, 2H), 7.71 (dd,  $J = 7.9, 2.2$  Hz, 1H), 7.57 (q,  $J = 2.8$  Hz, 3H), 7.45 – 7.38 (m, 1H), 7.34 (d,  $J = 7.7$  Hz, 1H), 7.31 – 7.21 (m, 1H), 4.1 – 4.0 (m, 1H), 3.88 (d,  $J = 2.0$  Hz, 3H), 3.83 (d,  $J = 2.2$  Hz, 3H), 3.47 (dd,  $J = 15.5, 2.2$  Hz, 1H), 3.4 – 3.3 (m, 1H), 2.9 – 2.8 (m, 2H), 1.41 (d,  $J = 2.1$  Hz, 3H).  $^{13}\text{C NMR}$  (100 MHz, Chloroform-*d*)  $\delta$  203.6, 178.5, 173.3, 171.7, 153.0, 142.6, 131.9, 131.2, 129.0, 128.8, 128.3, 126.8, 122.9, 121.4, 64.8, 60.4, 58.2, 53.5, 53.3, 42.7, 36.2, 28.6. **HRMS** (ESI) ( $m/z$ ) calculated for  $\text{C}_{24}\text{H}_{24}\text{NO}_5$   $[\text{M}+\text{H}]^+$ : 406.1649, found: 406.1645.

## 12. References

- 1 A. B. Rolka and B. Koenig, *Org. Lett.*, 2020, **22**, 5035–5040.
- 2 M. Zhu, K. Zhou, X. Zhang and S. L. You, *Org. Lett.*, 2018, **20**, 4379–4383.





**2a (minor),  $^1\text{H}$  NMR (400 MHz, Chloroform-*d*) and  $^{13}\text{C}$  NMR (100 MHz, Chloroform-*d*)**

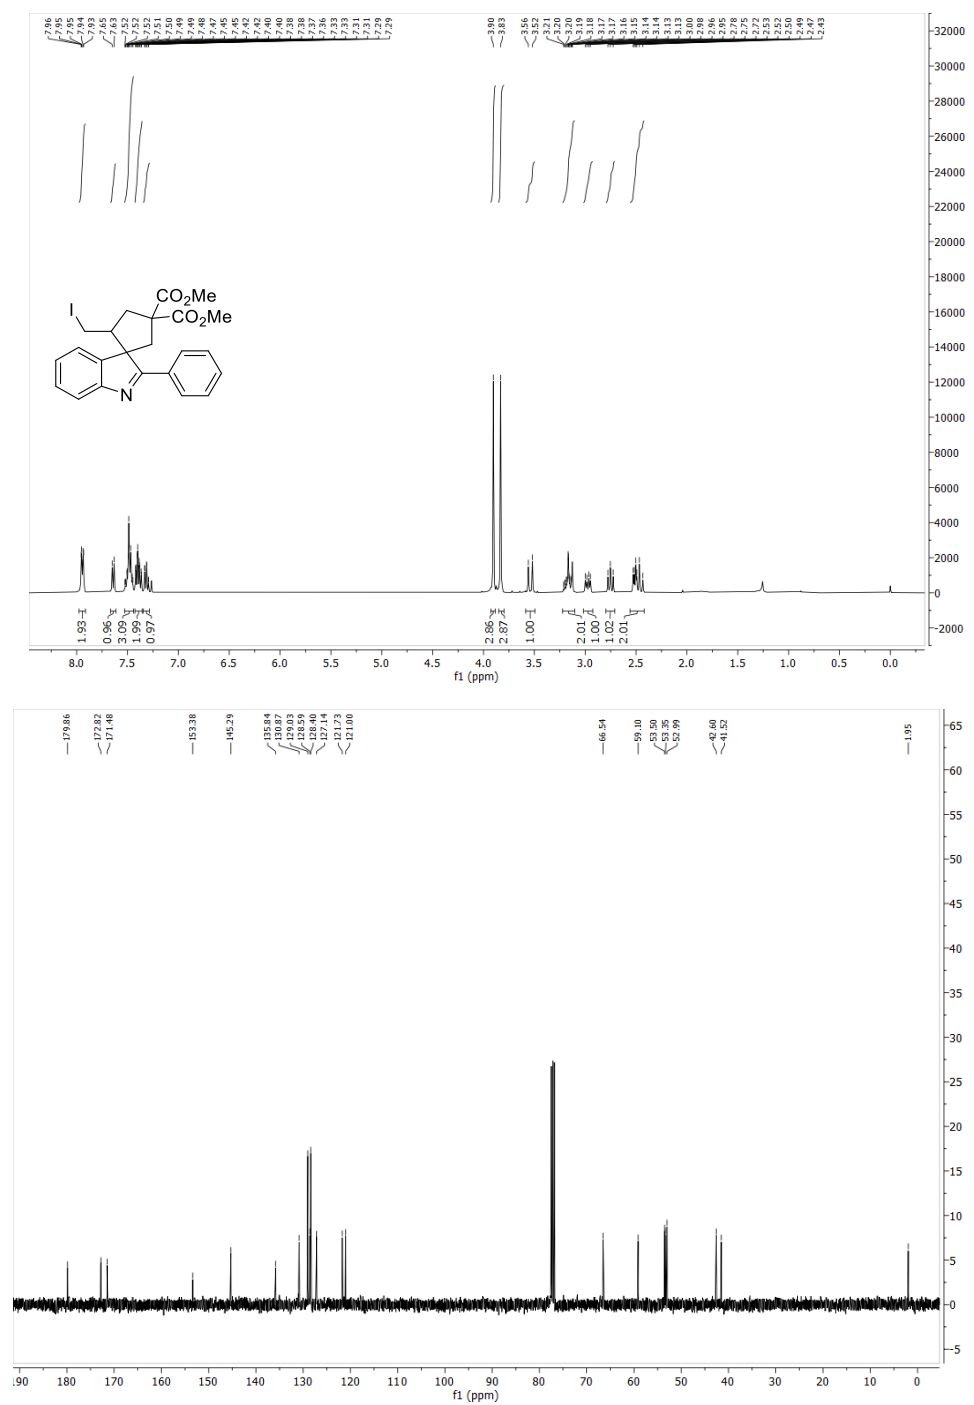

**2b,  $^1\text{H}$  NMR (500 MHz, Chloroform- $d$ ) and  $^{13}\text{C}$  NMR (125 MHz, Chloroform- $d$ )**

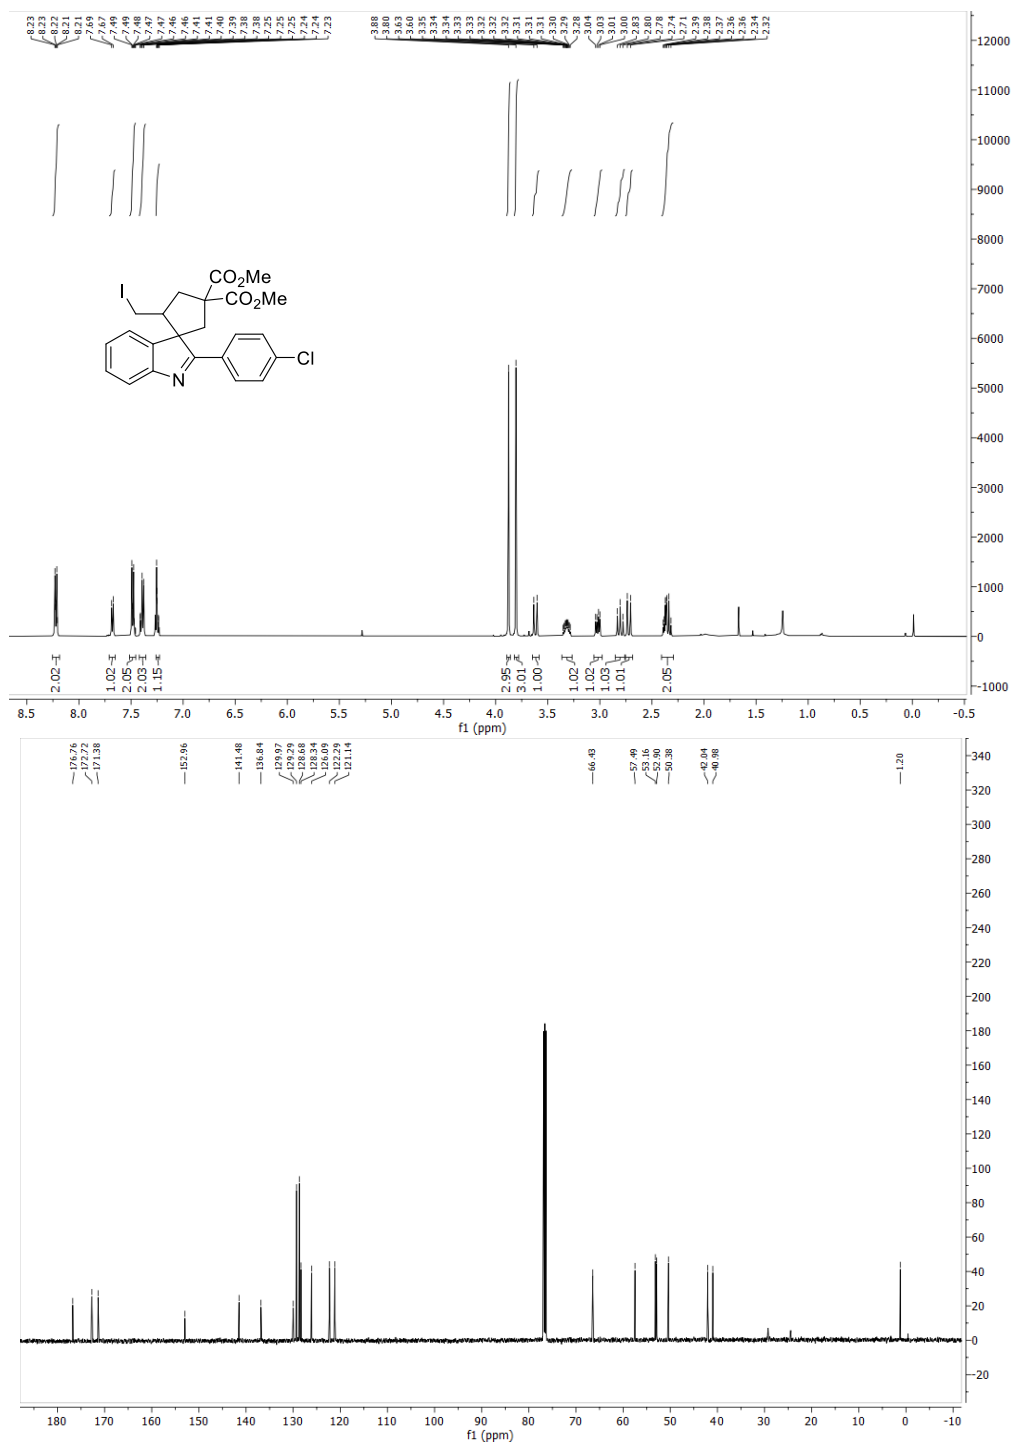

2c, <sup>1</sup>H NMR (400 MHz, Chloroform-d) and <sup>13</sup>C NMR (100 MHz, Chloroform-d)

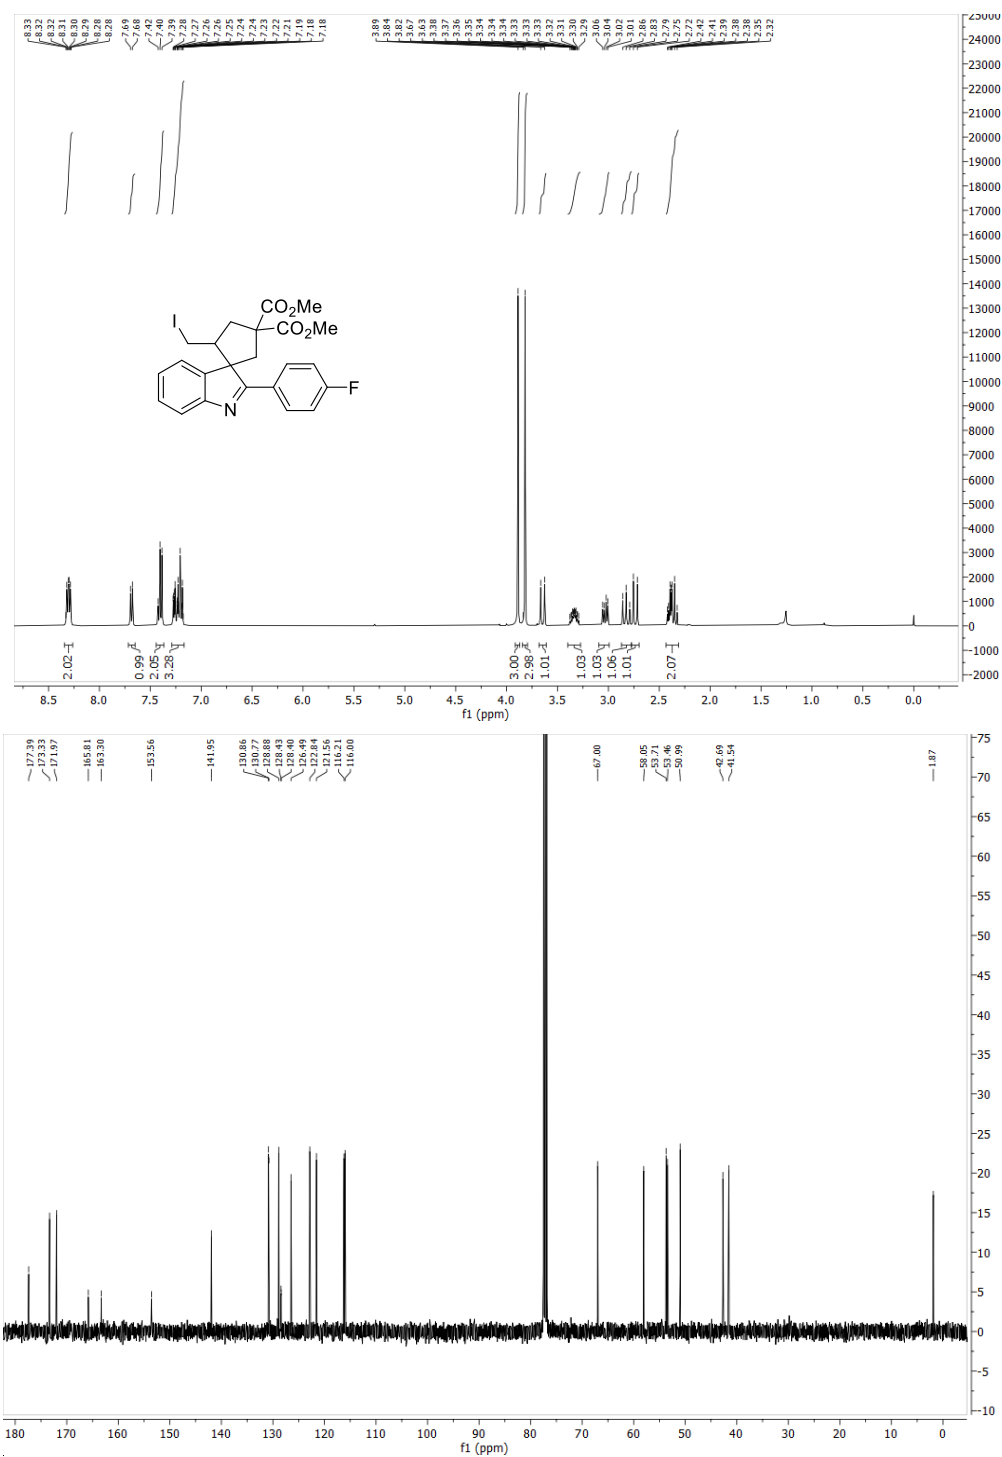

**2d, <sup>1</sup>H NMR (500 MHz, Chloroform-*d*) and <sup>13</sup>C NMR (125 MHz, Chloroform-*d*)**

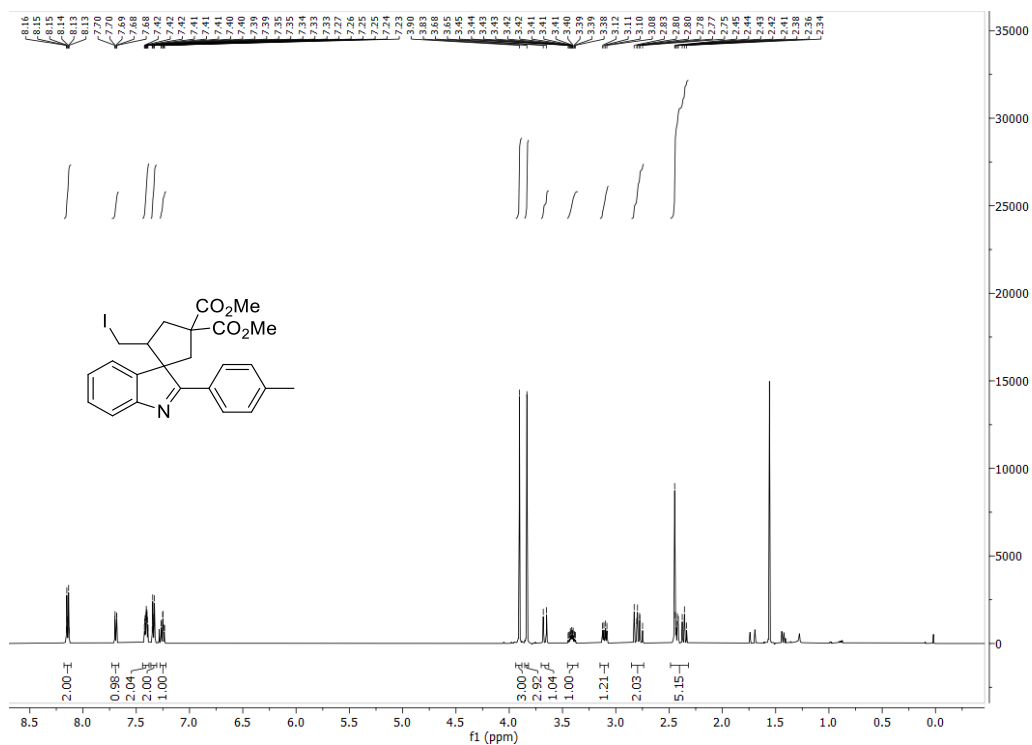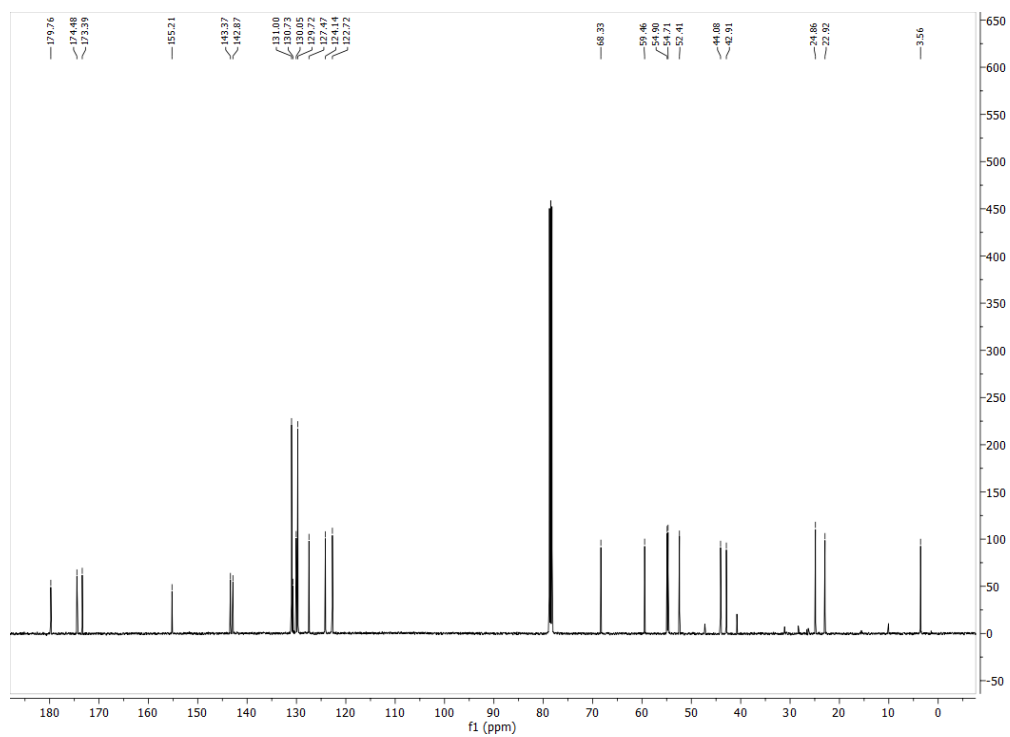



**2f**,  $^1\text{H}$  NMR (500 MHz,  $\text{DMSO-}d_6$ ) and  $^{13}\text{C}$  NMR (125 MHz,  $\text{DMSO-}d_6$ )

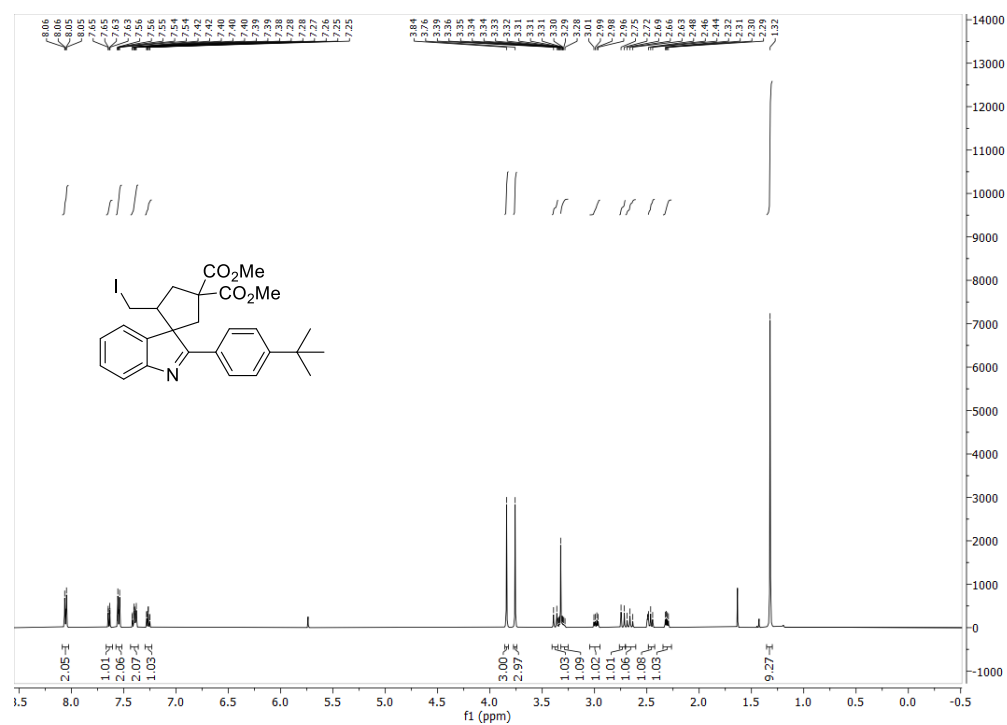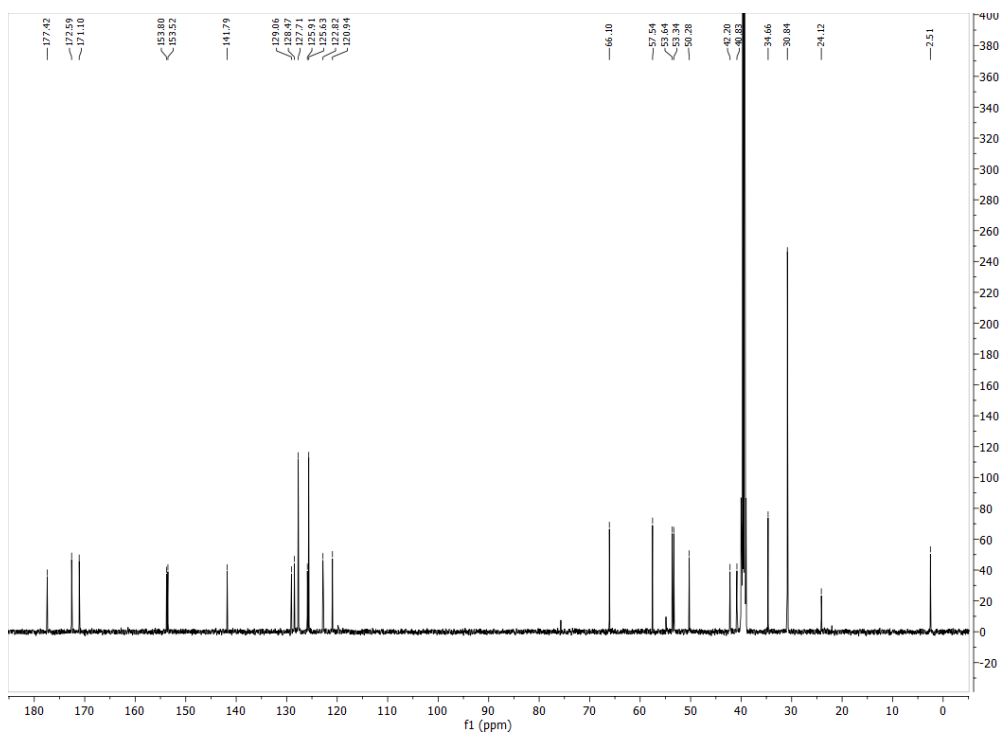

**2g**,  $^1\text{H}$  NMR (500 MHz,  $\text{DMSO-}d_6$ ) and  $^{13}\text{C}$  NMR (125 MHz,  $\text{DMSO-}d_6$ )

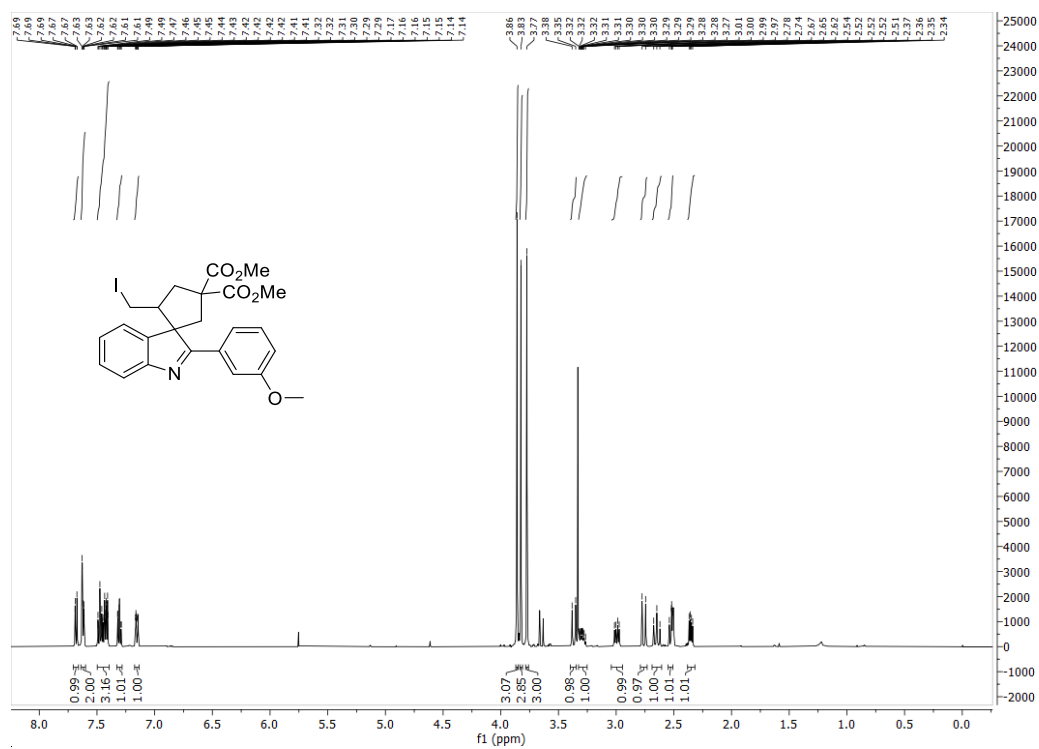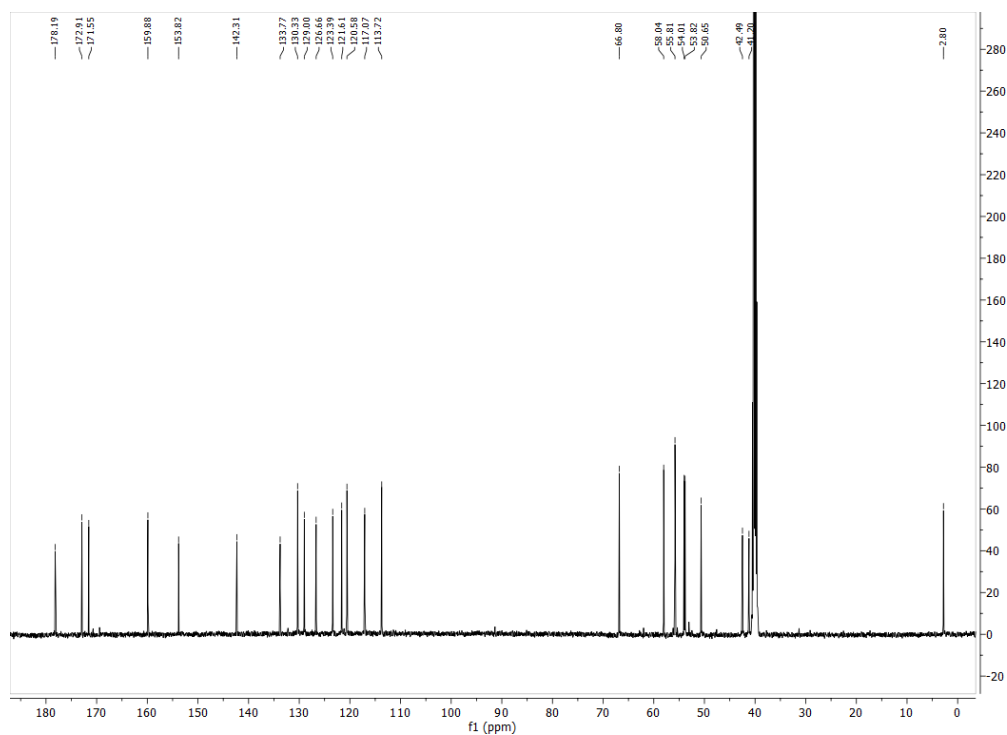



**2h,  $^1\text{H}$  NMR (400 MHz, Chloroform-*d*) ad  $^{13}\text{C}$  NMR (100 MHz, Chloroform-*d*)**

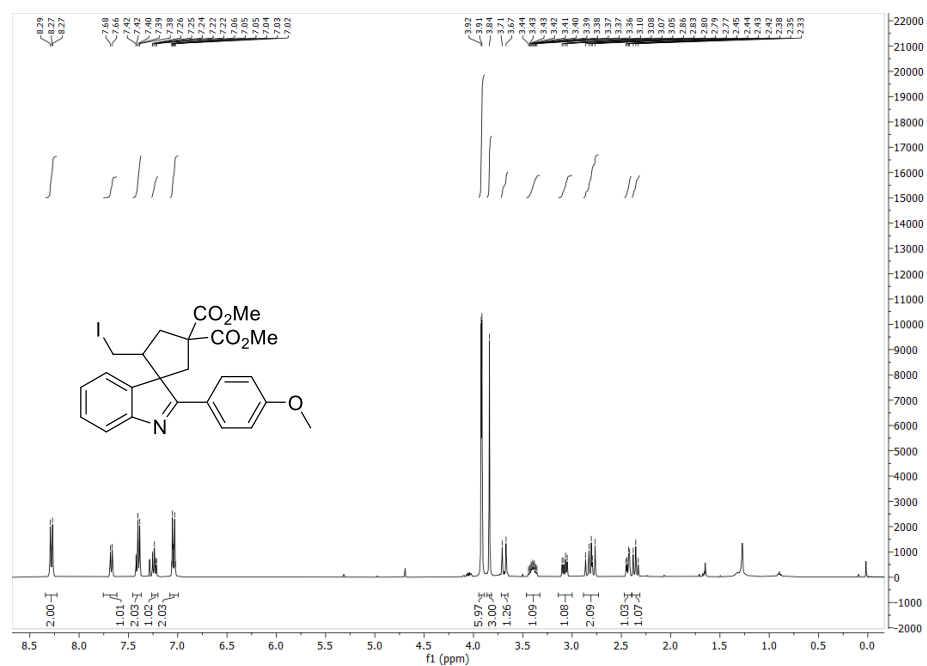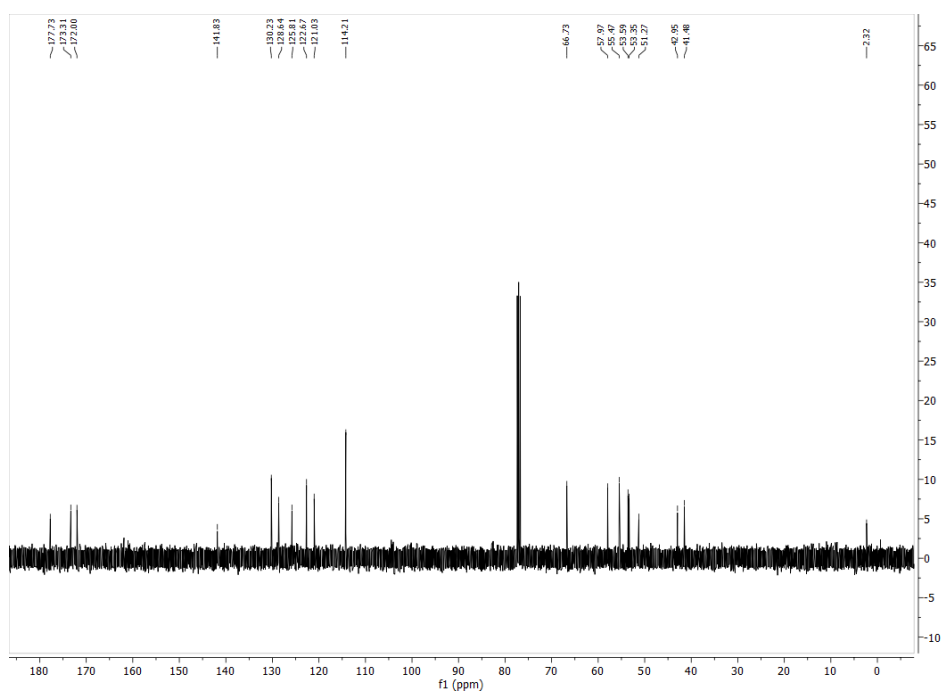







**21, <sup>1</sup>H NMR (600 MHz, Chloroform-*d*) and <sup>13</sup>C NMR (150 MHz, Chloroform-*d*)**

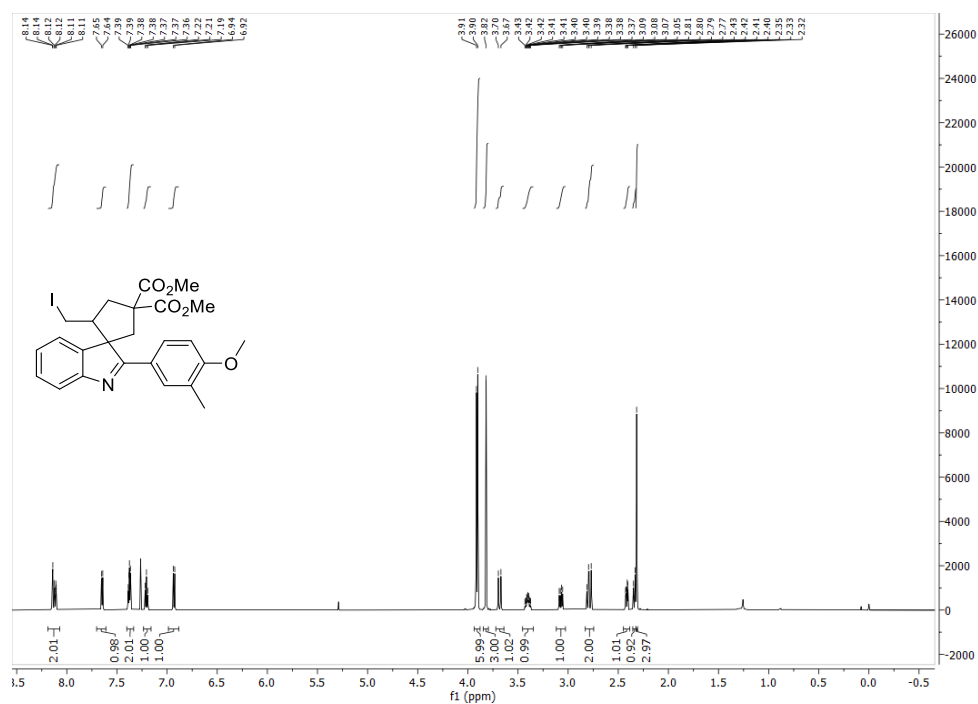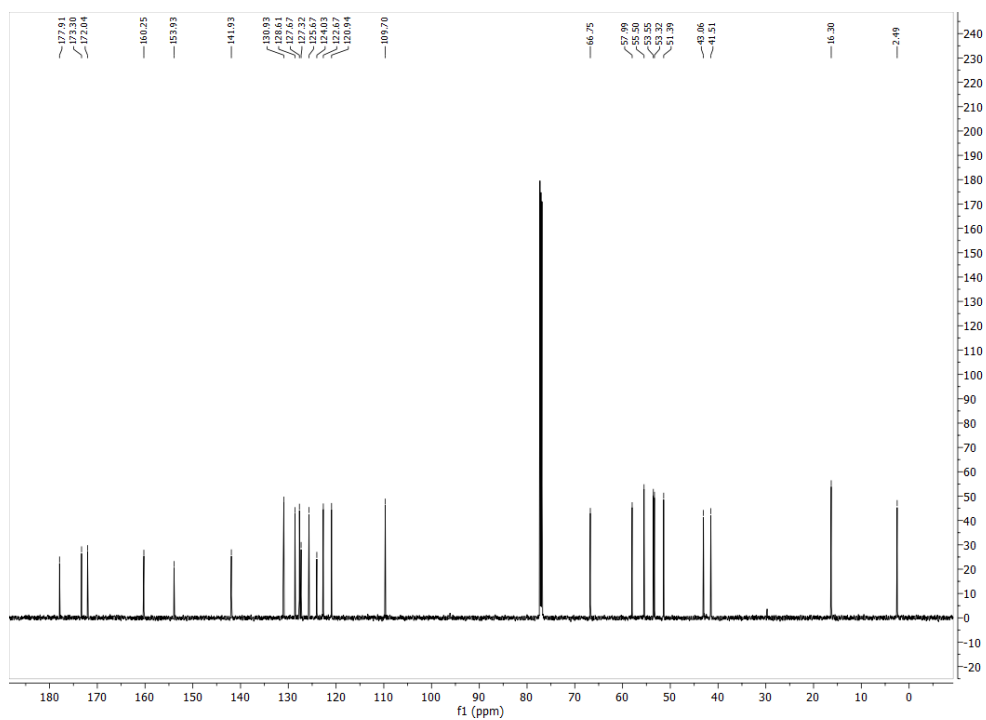

**2m, <sup>1</sup>H NMR (600 MHz, Chloroform-*d*) and <sup>13</sup>C NMR (125 MHz, Chloroform-*d*)**

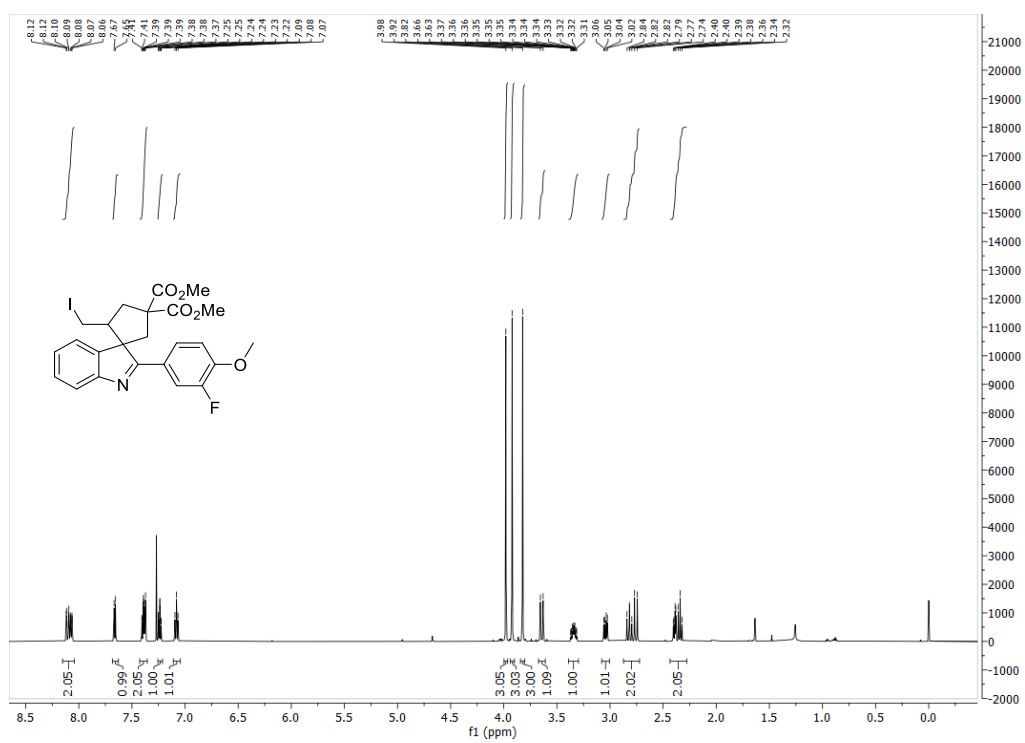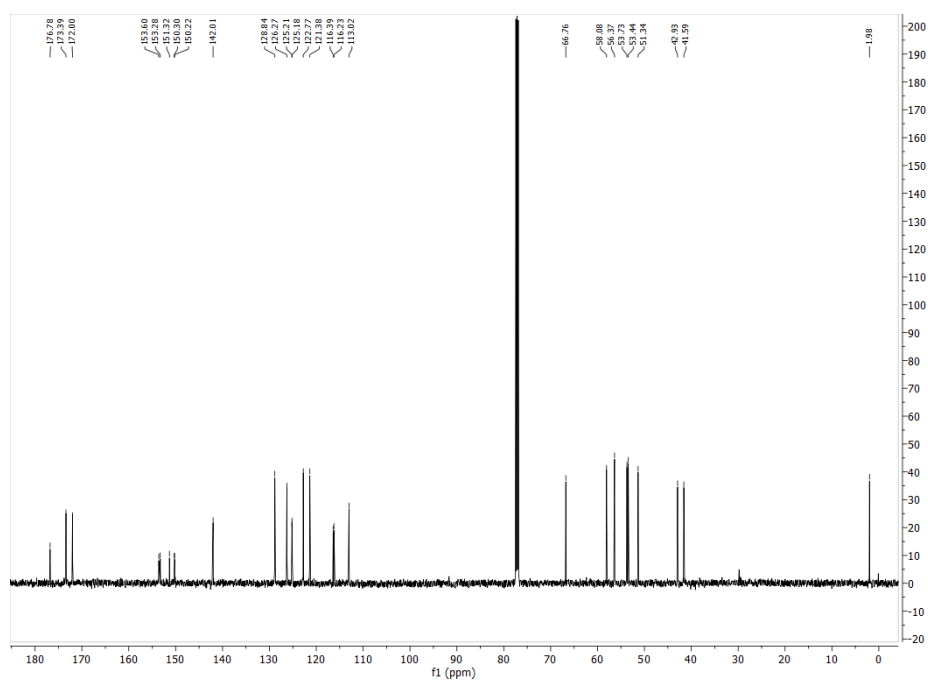

**2n, <sup>1</sup>H NMR (600 MHz, Chloroform-d) and <sup>13</sup>C NMR (125 MHz, Chloroform-d)**

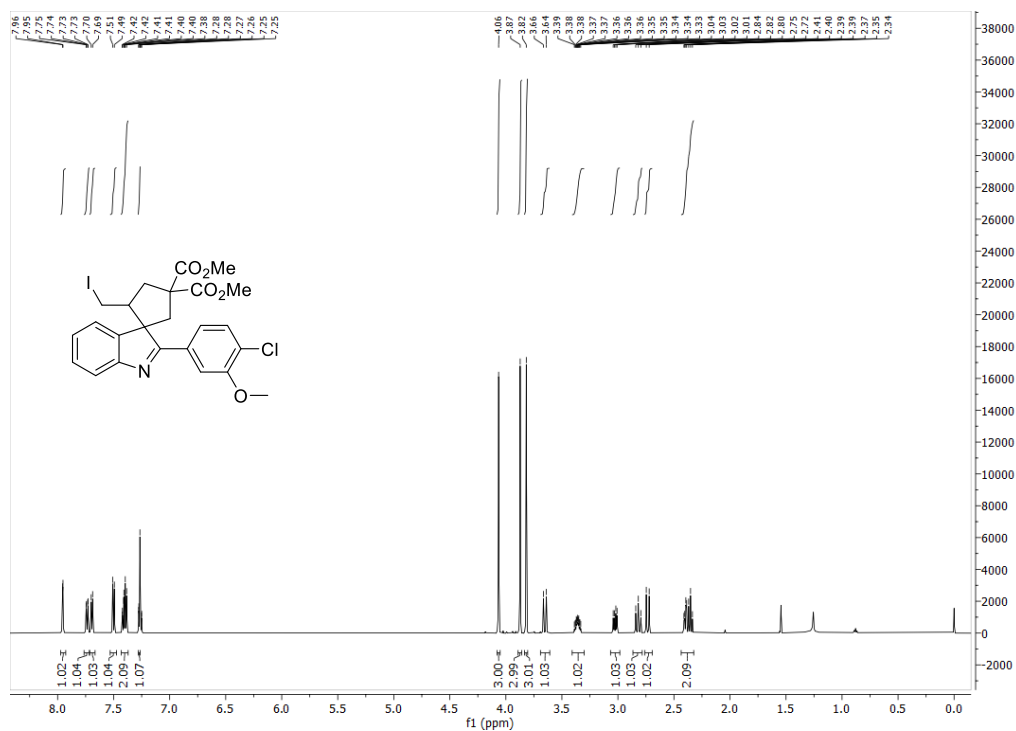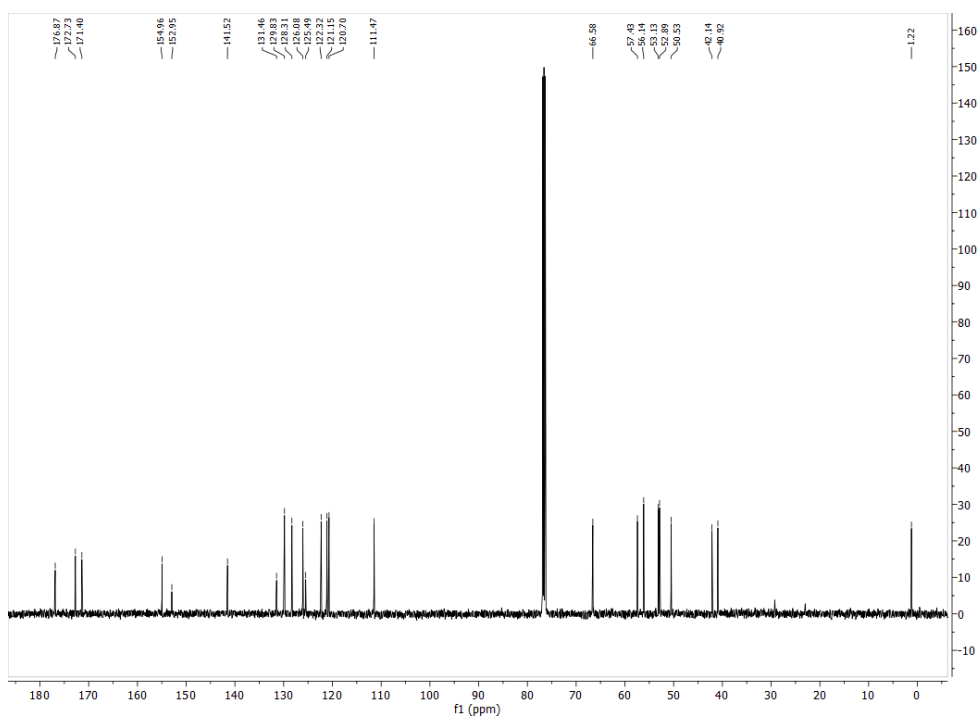

**2o, <sup>1</sup>H NMR (600 MHz, Chloroform-*d*) and <sup>13</sup>C NMR (125 MHz, Chloroform-*d*)**

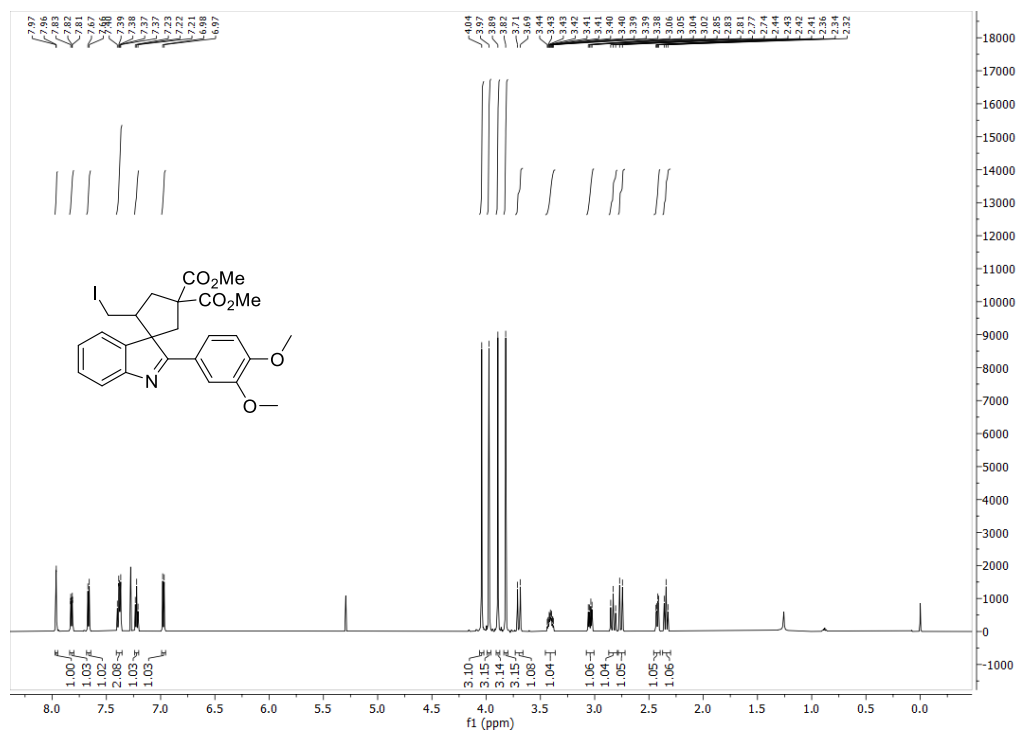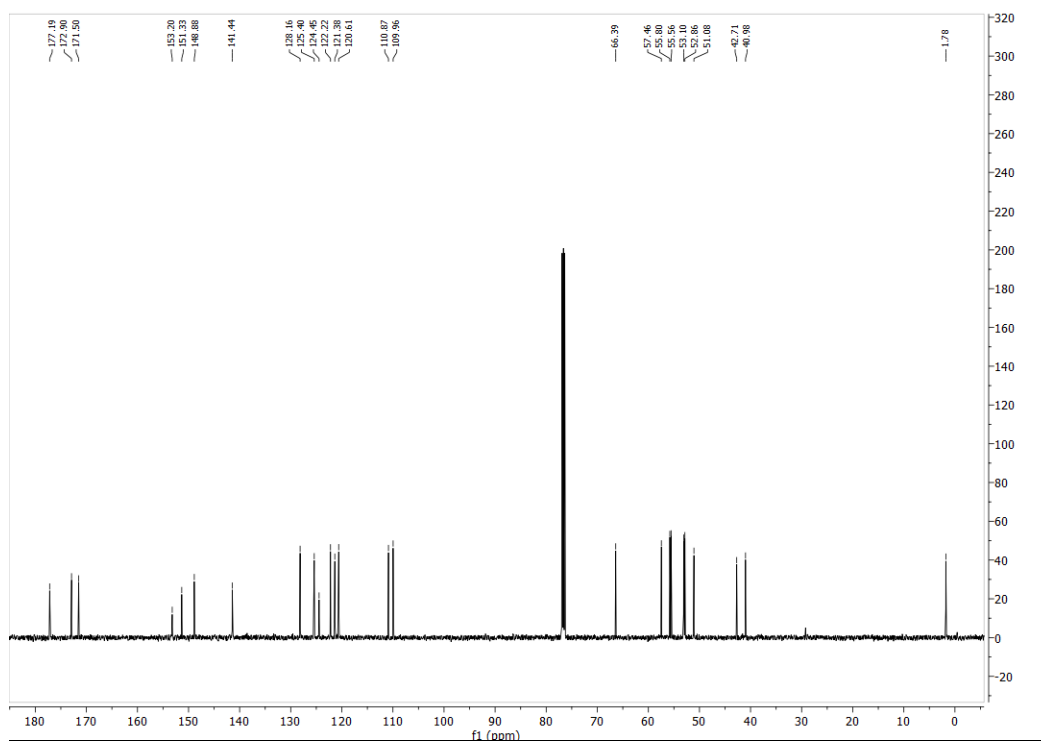





**2q, <sup>1</sup>H NMR (500 MHz, Chloroform-d) and <sup>13</sup>C NMR (125 MHz, Chloroform-d)**

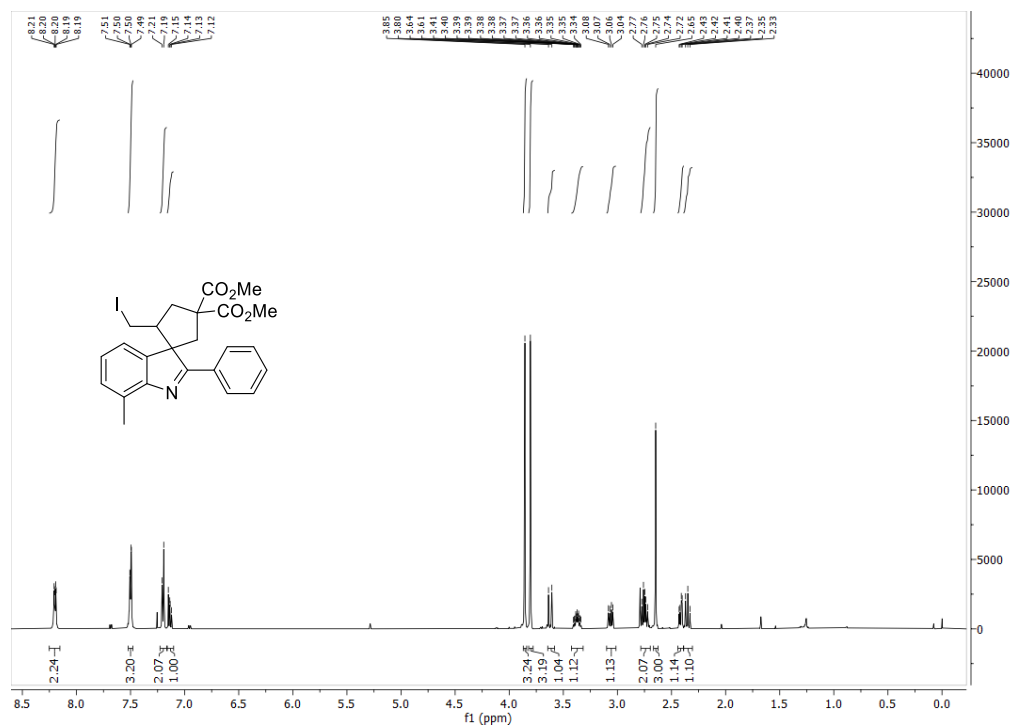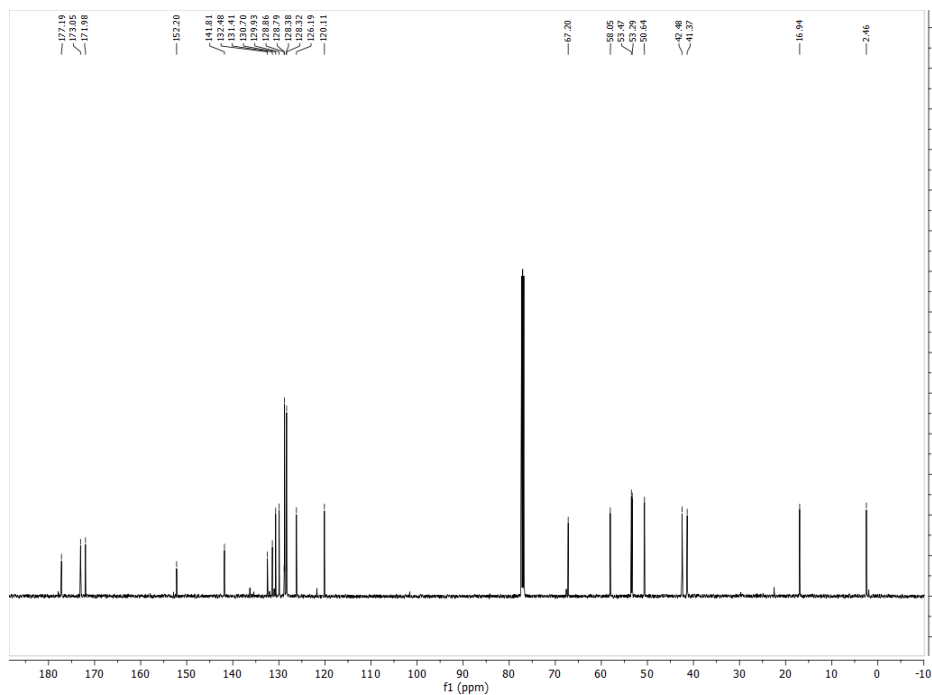

2r, <sup>1</sup>H NMR (500 MHz, DMSO-d<sub>6</sub>) and <sup>13</sup>C NMR (125 MHz, DMSO-d<sub>6</sub>)

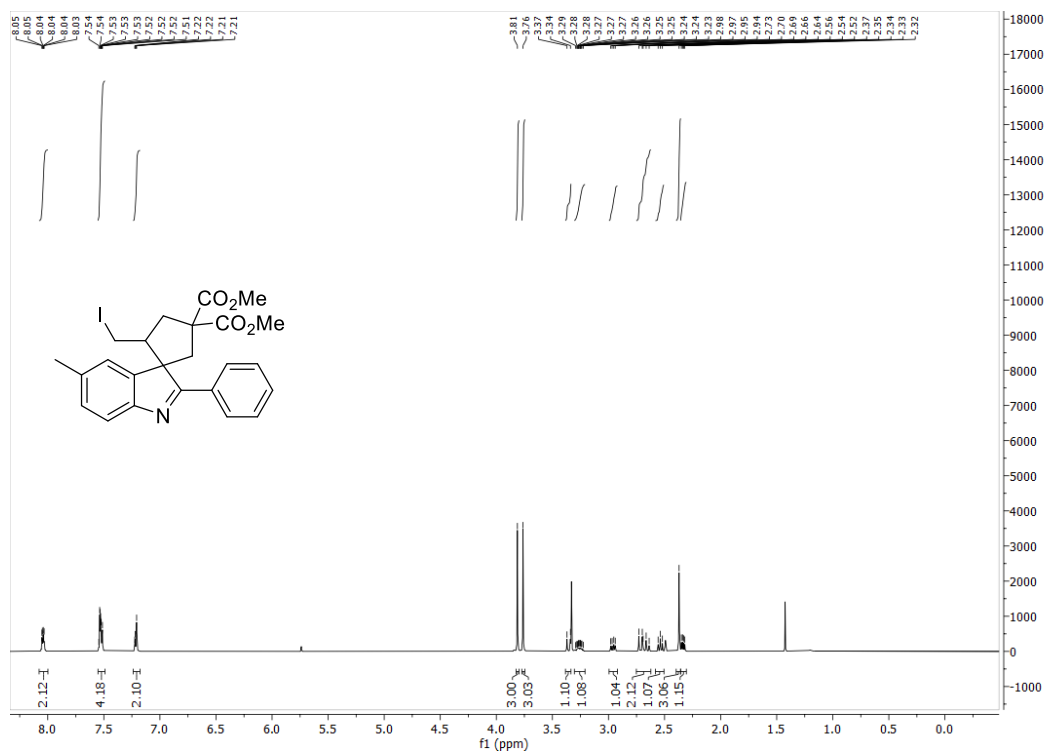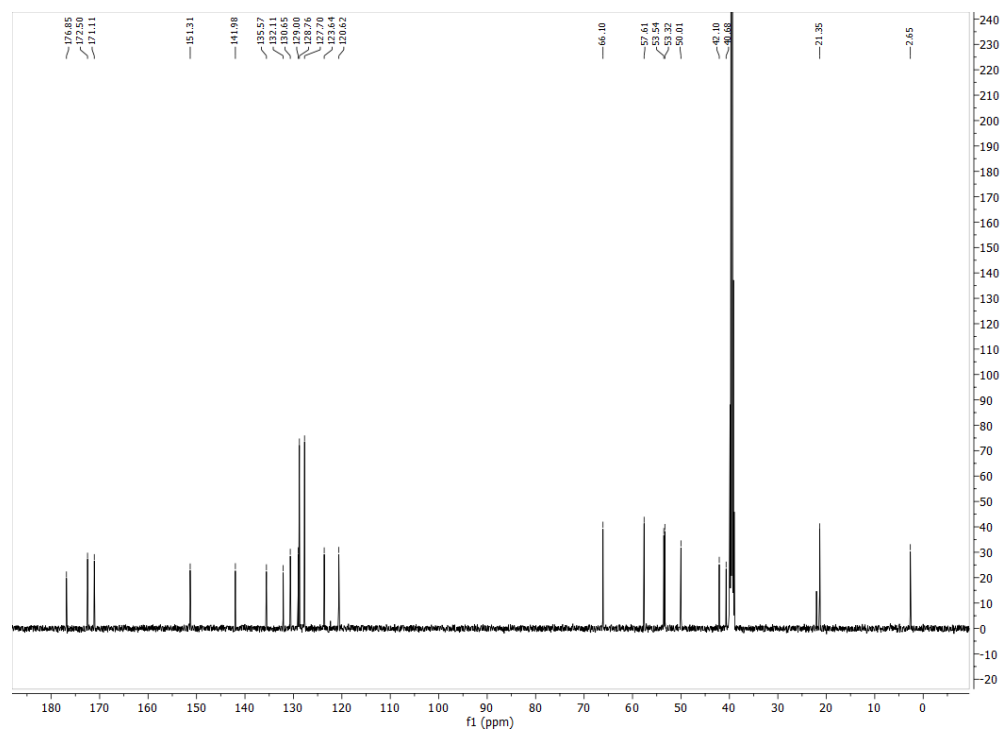



**2t**,  $^1\text{H}$  NMR (500 MHz, Chloroform-*d*) and  $^{13}\text{C}$  NMR (125 MHz, Chloroform-*d*)

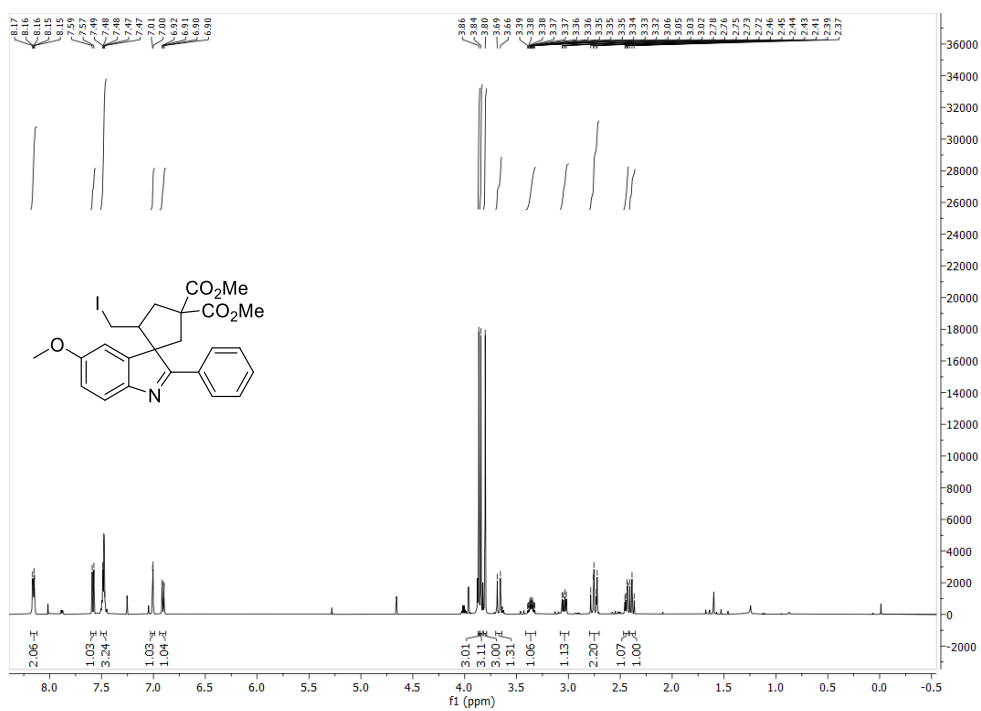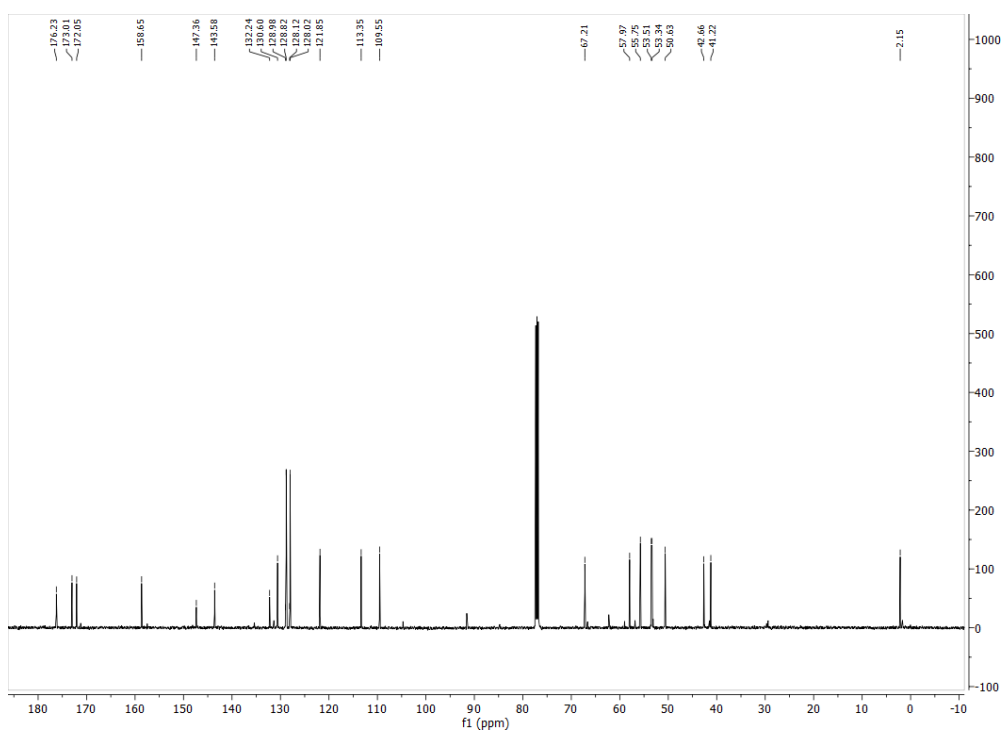

**2u**,  $^1\text{H}$  NMR (500 MHz,  $\text{DMSO-}d_6$ ) and  $^{13}\text{C}$  NMR (125 MHz,  $\text{DMSO-}d_6$ )

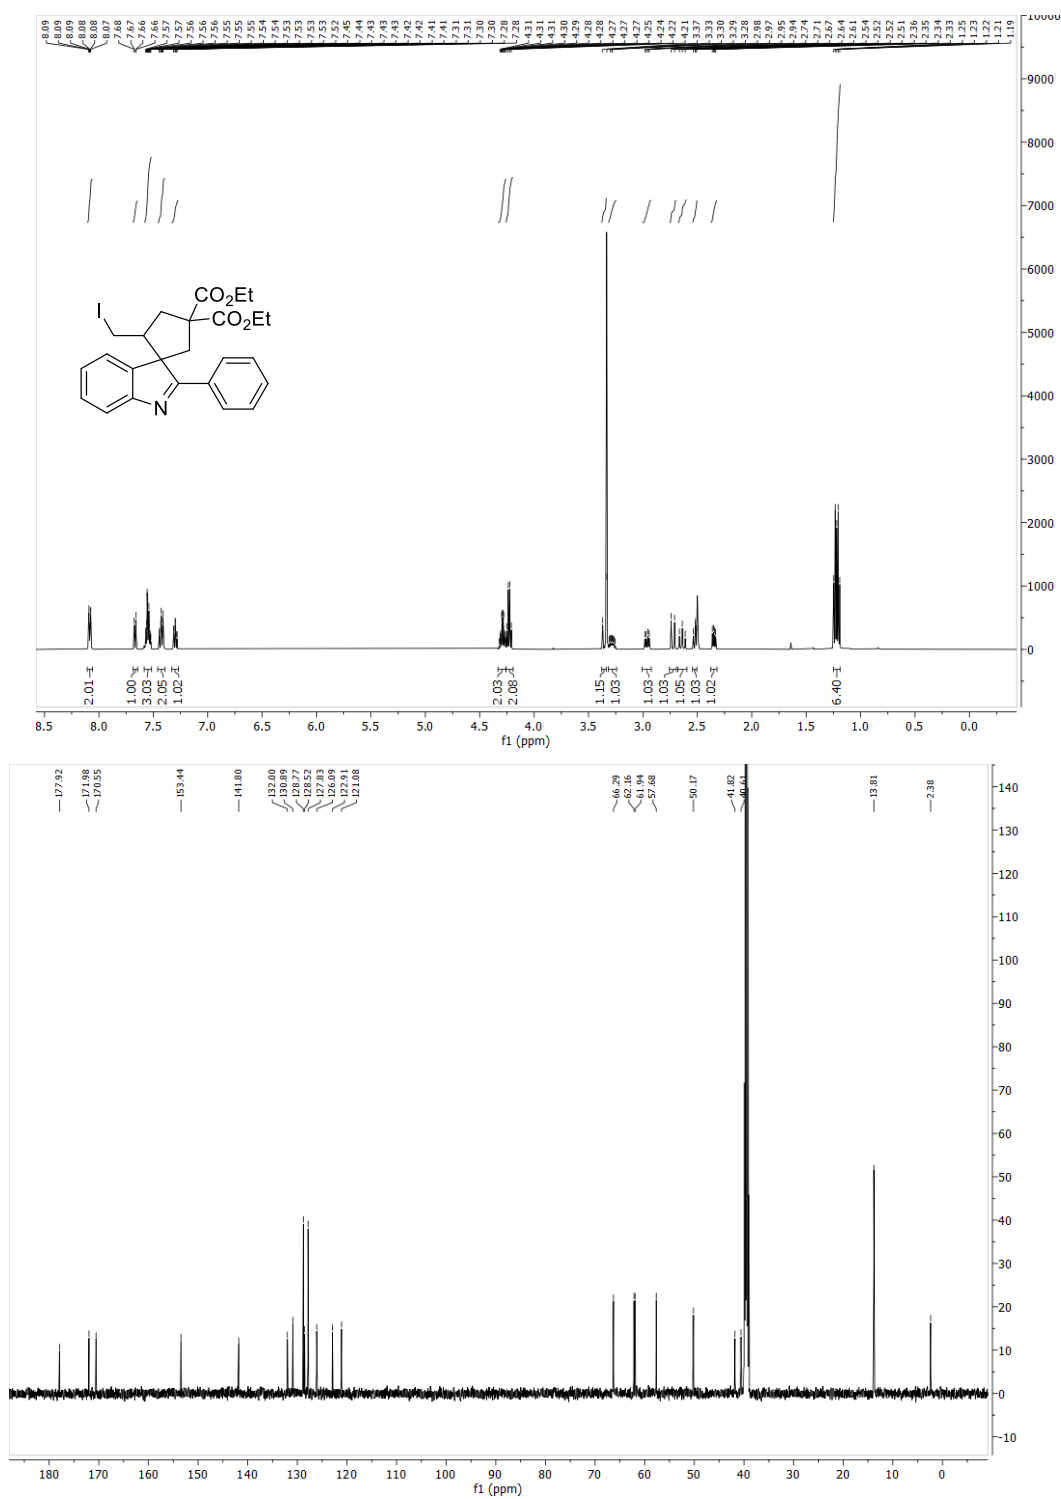

**2v, <sup>1</sup>H NMR (400 MHz, Chloroform-d) and <sup>13</sup>C NMR (100 MHz, Chloroform-d)**

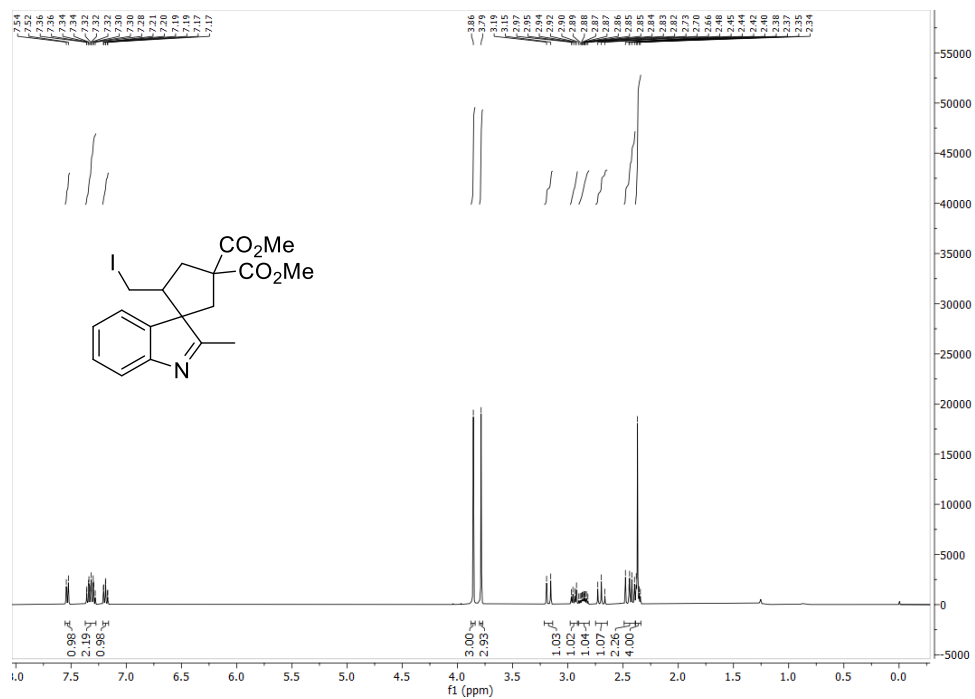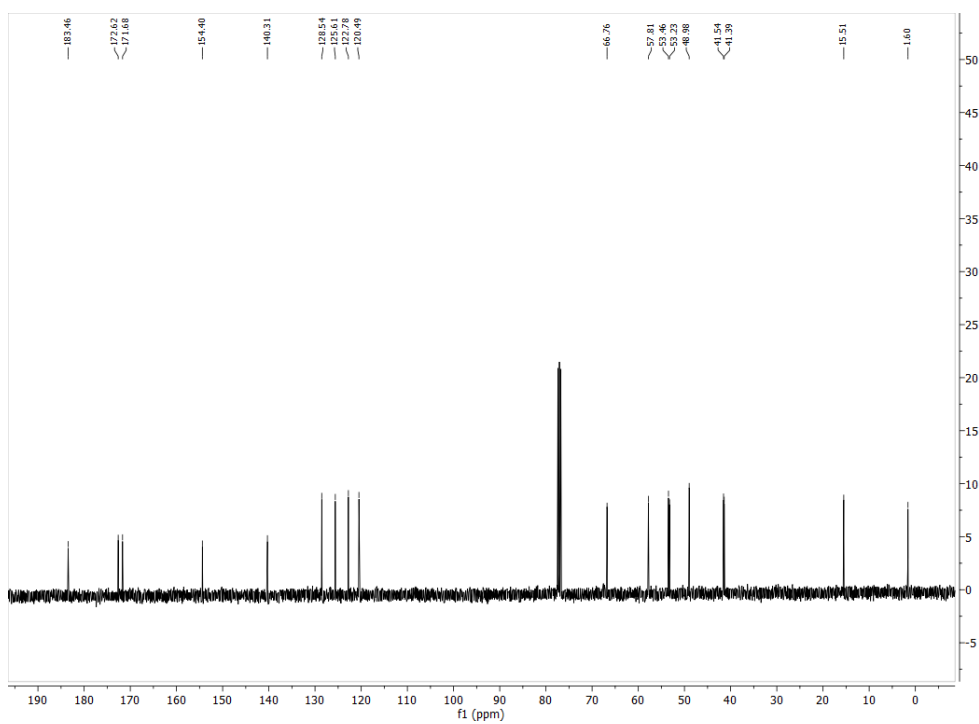





**2x, <sup>1</sup>H NMR (600 MHz, Chloroform-*d*) and <sup>13</sup>C NMR (100 MHz, Chloroform-*d*)**

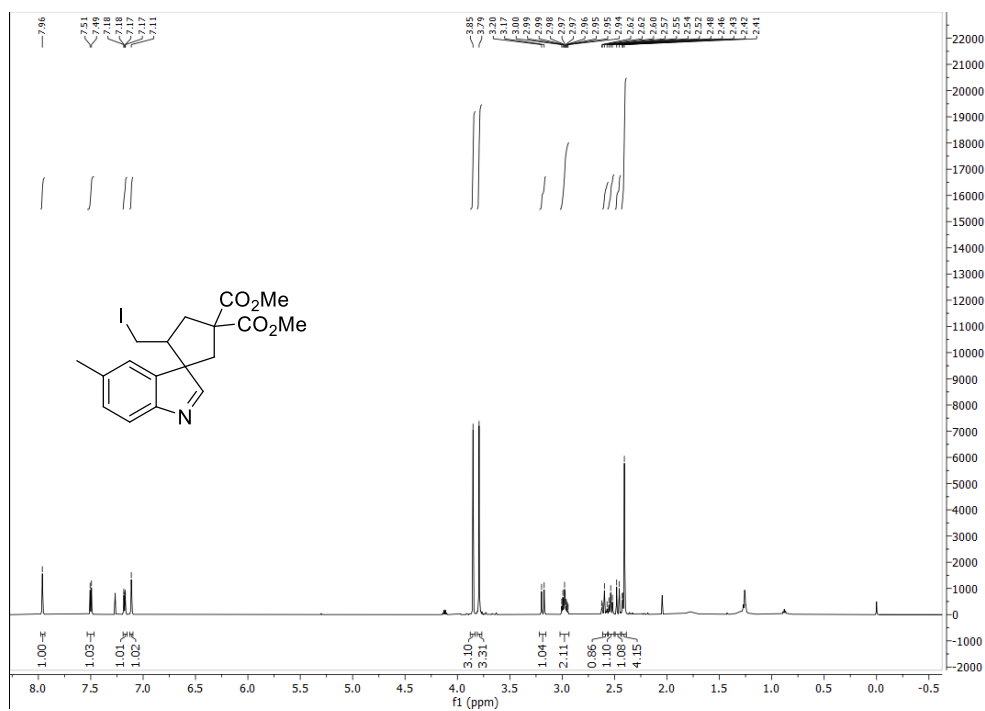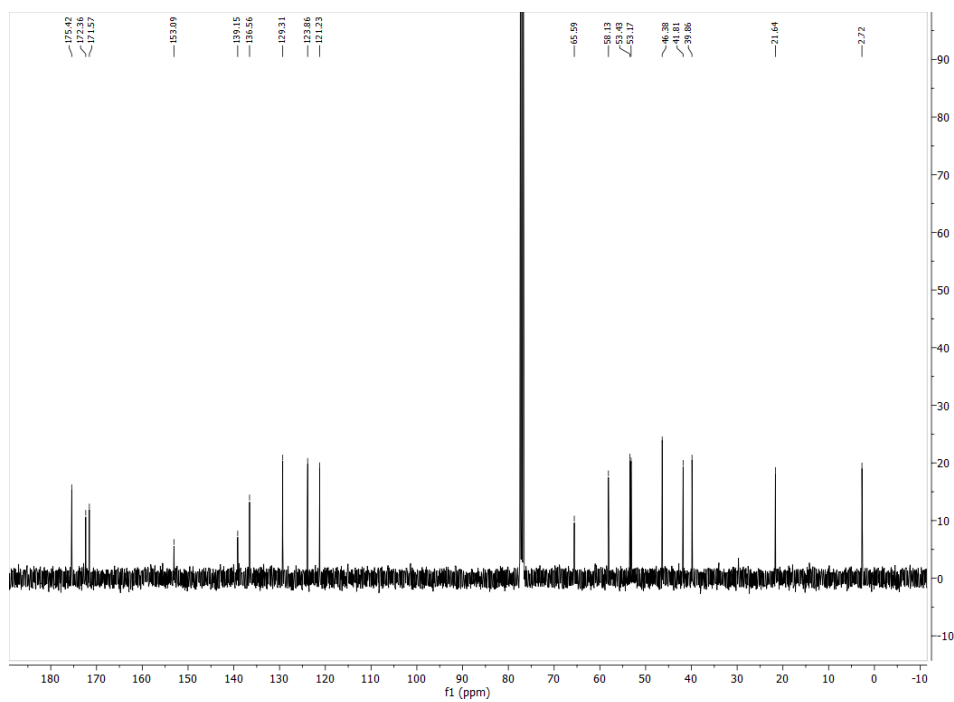

2y, <sup>1</sup>H NMR (400 MHz, Chloroform-*d*) and <sup>13</sup>C NMR (100 MHz, Chloroform-*d*)

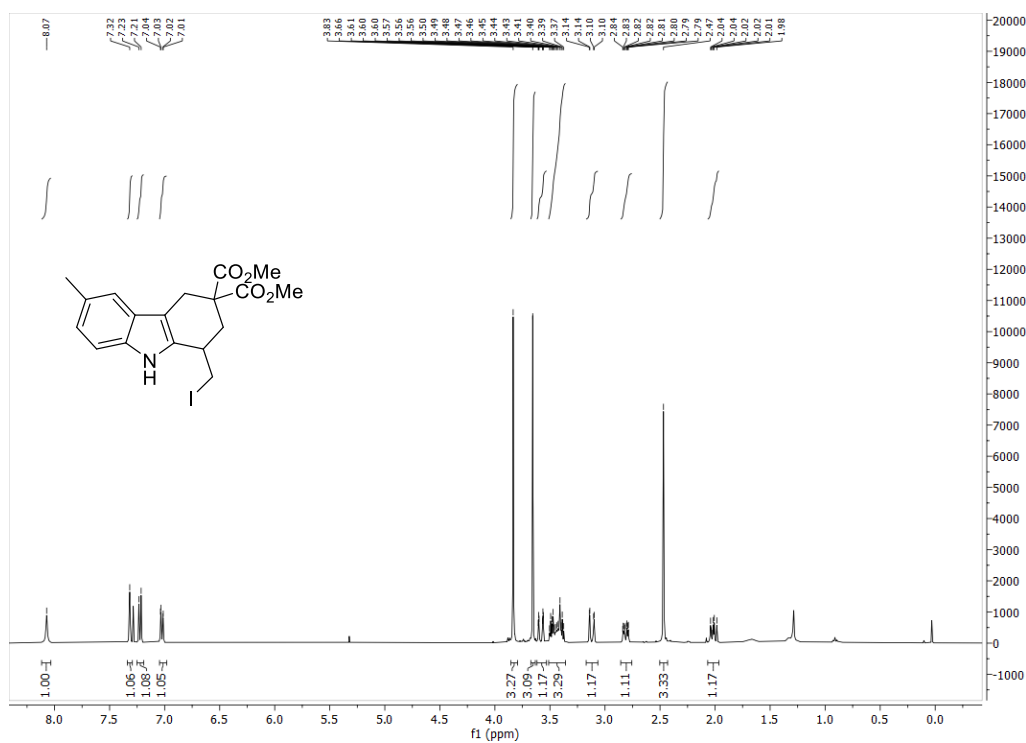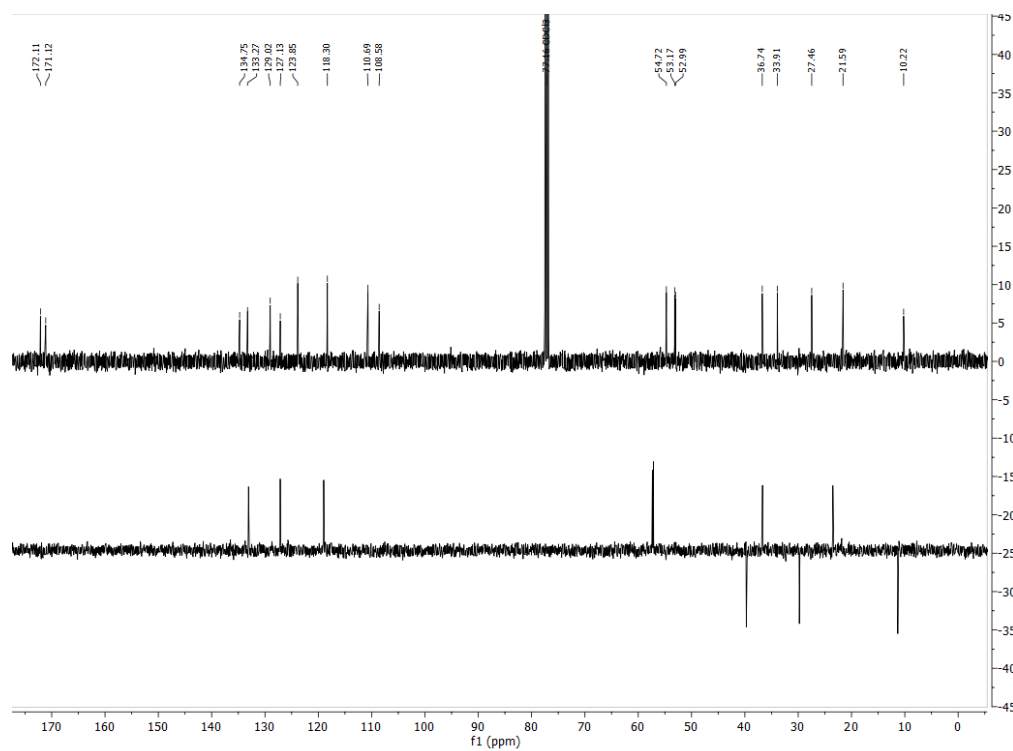

**3a, <sup>1</sup>H NMR (600 MHz, Chloroform-d) and <sup>13</sup>C NMR (125 MHz, Chloroform-d)**

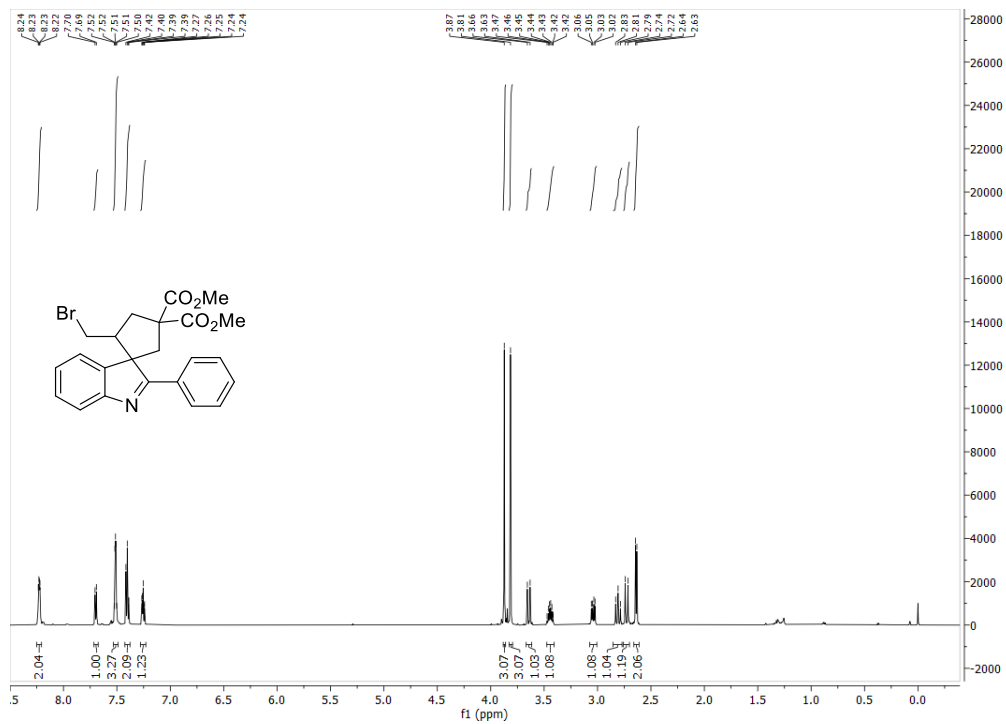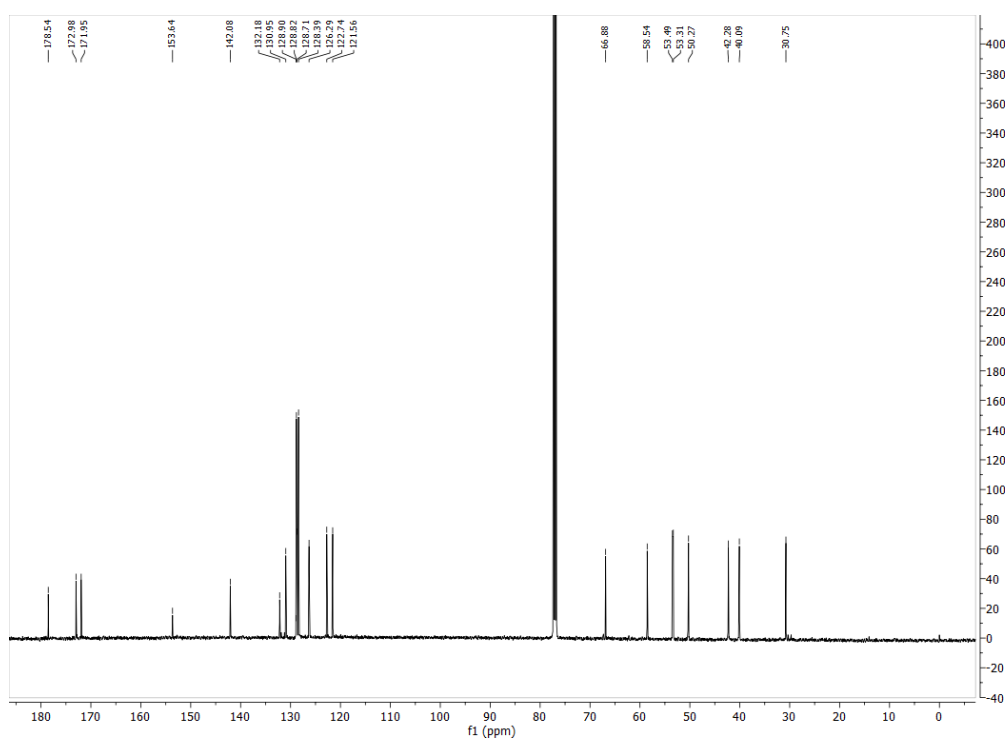

**3b, <sup>1</sup>H NMR (600 MHz, Chloroform-d) and <sup>13</sup>C NMR (125 MHz, Chloroform-d)**

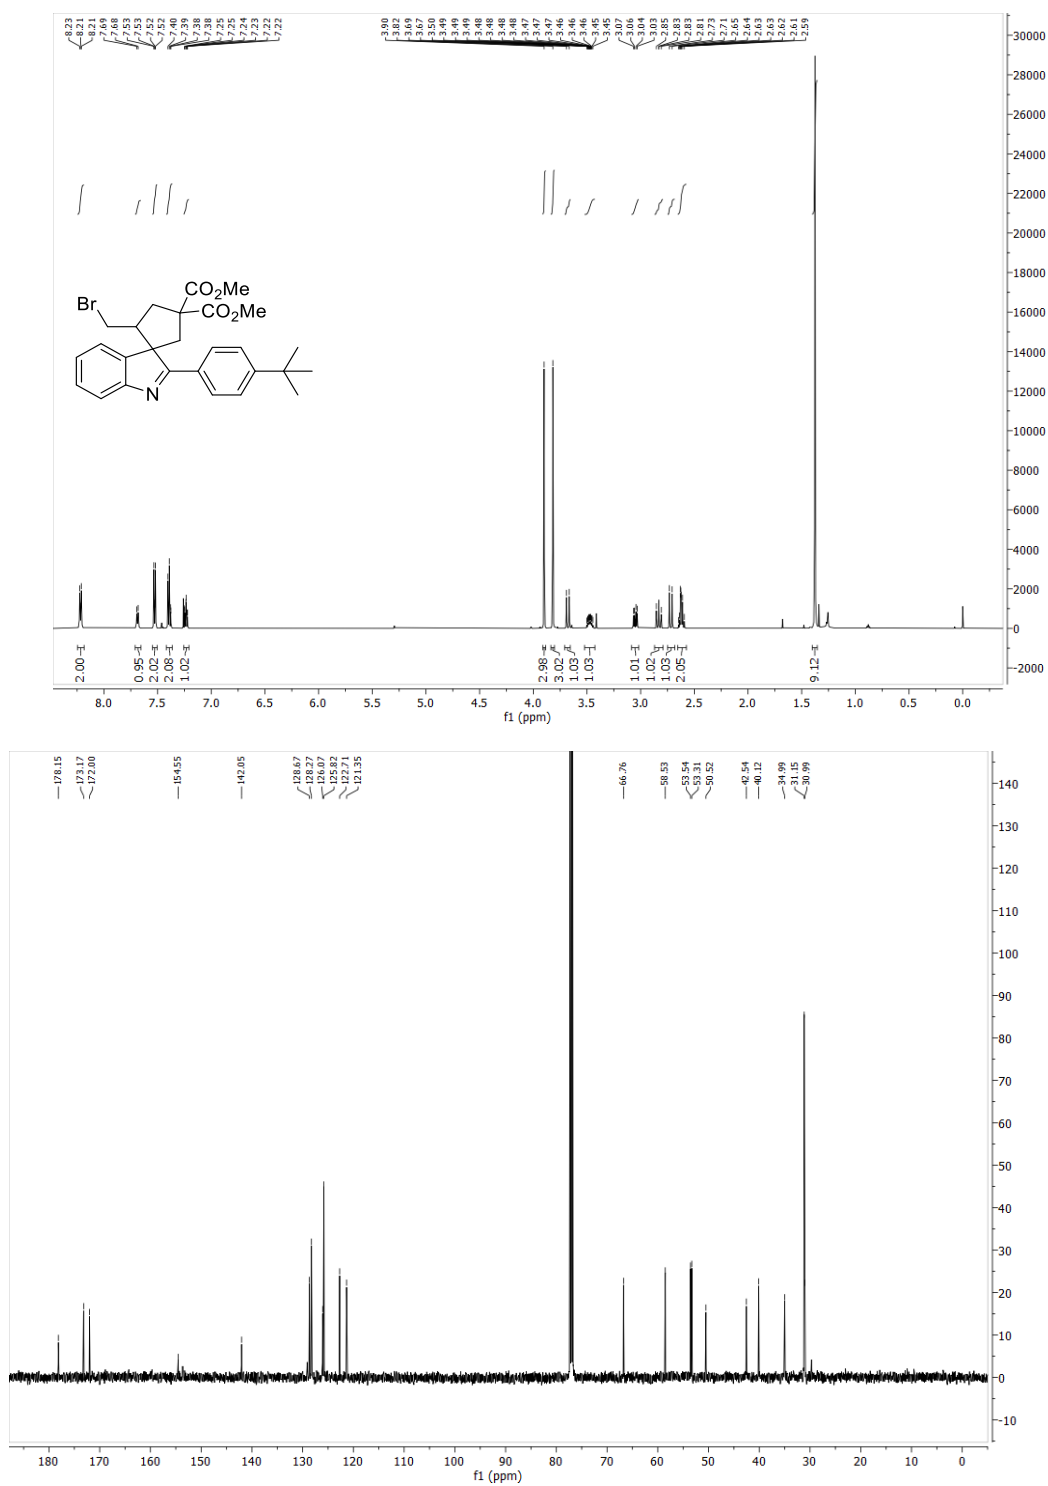

**3c, <sup>1</sup>H NMR (600 MHz, Chloroform-d) and <sup>13</sup>C NMR (150 MHz, Chloroform-d)**

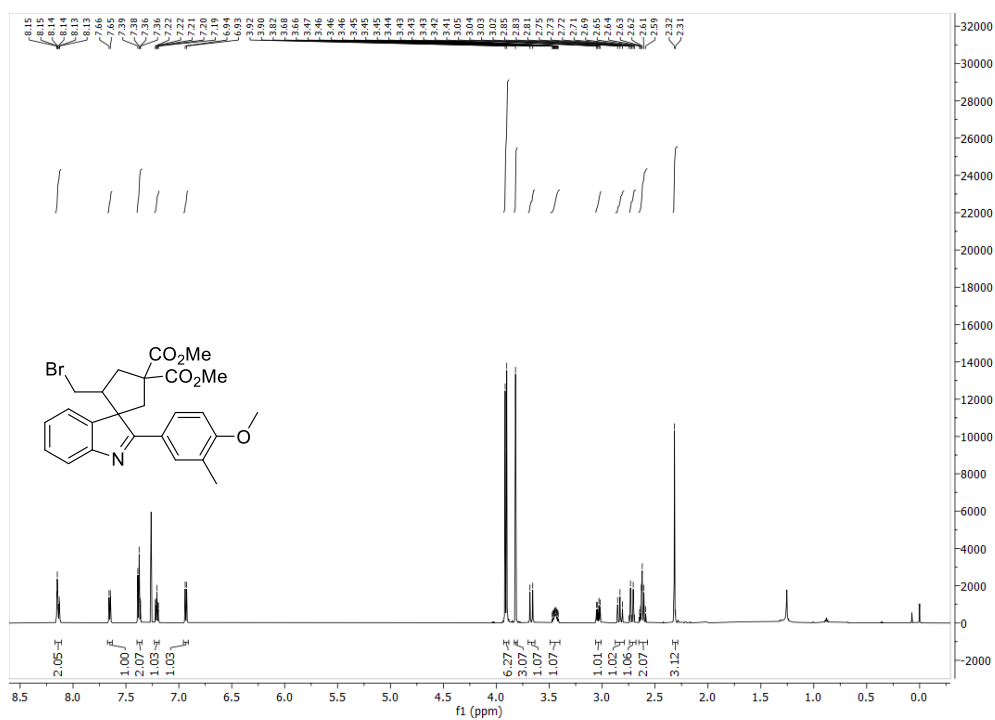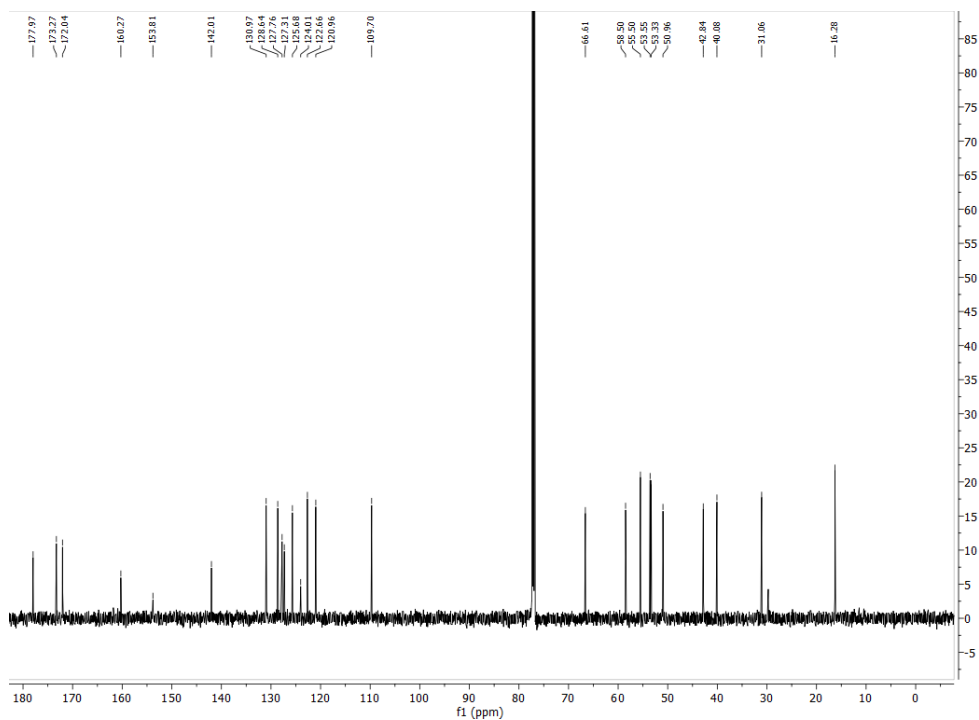

**3d, <sup>1</sup>H NMR (400 MHz, Chloroform-*d*) and <sup>13</sup>C NMR (125 MHz, Chloroform-*d*)**

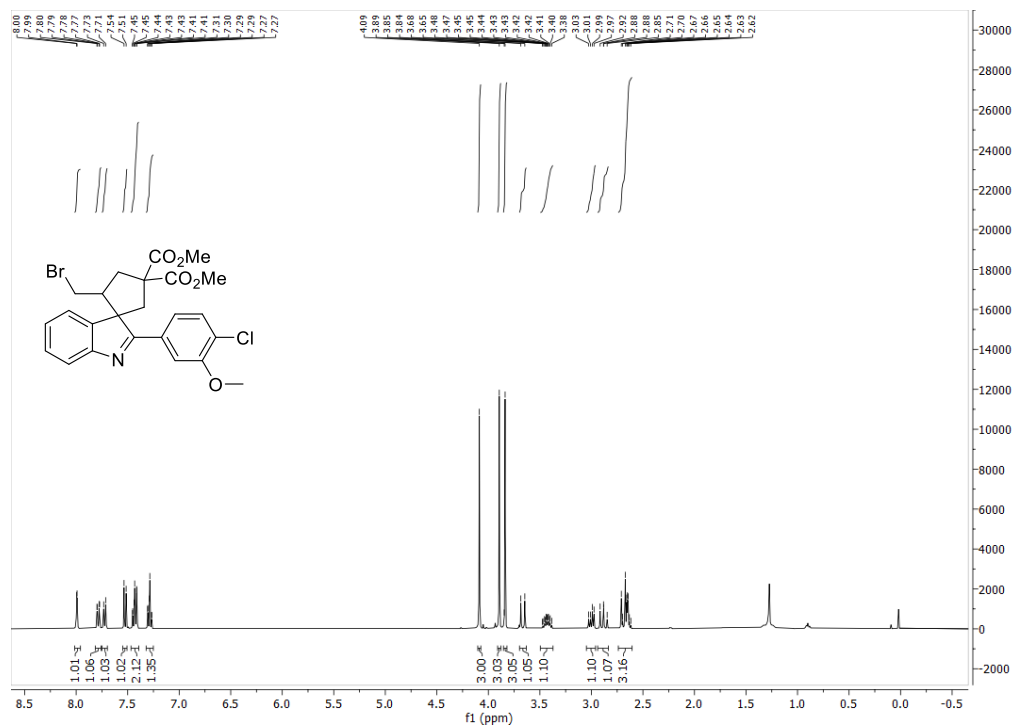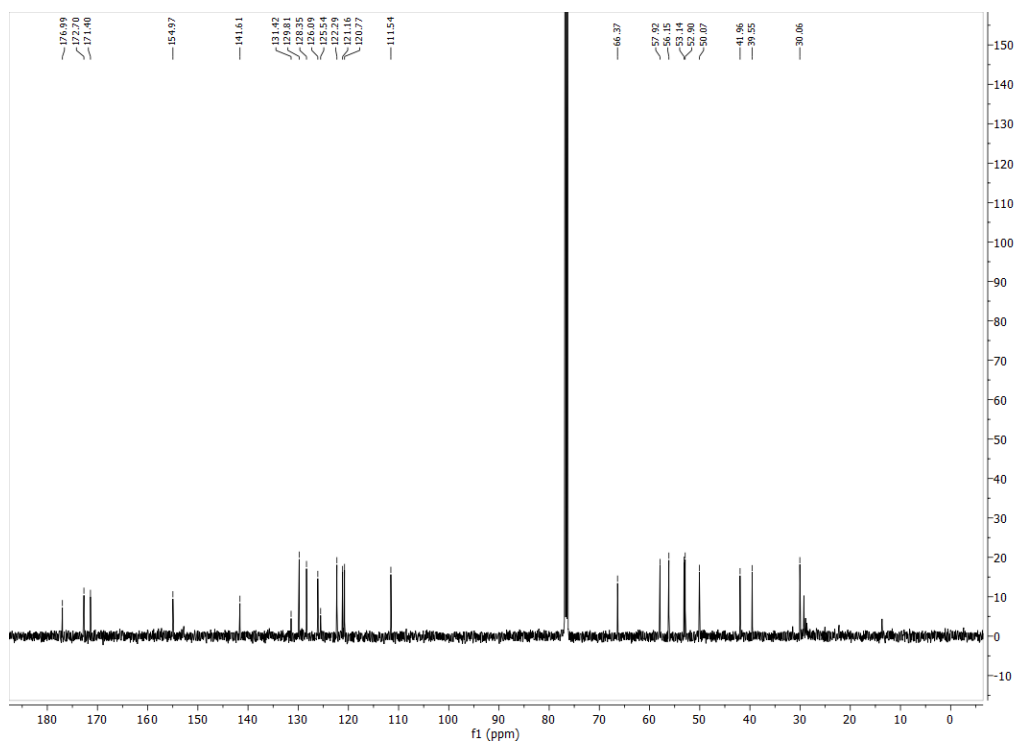



**3f**,  $^1\text{H}$  NMR (400 MHz, Chloroform- $d$ ) and  $^{13}\text{C}$  NMR (100 MHz, Chloroform- $d$ )

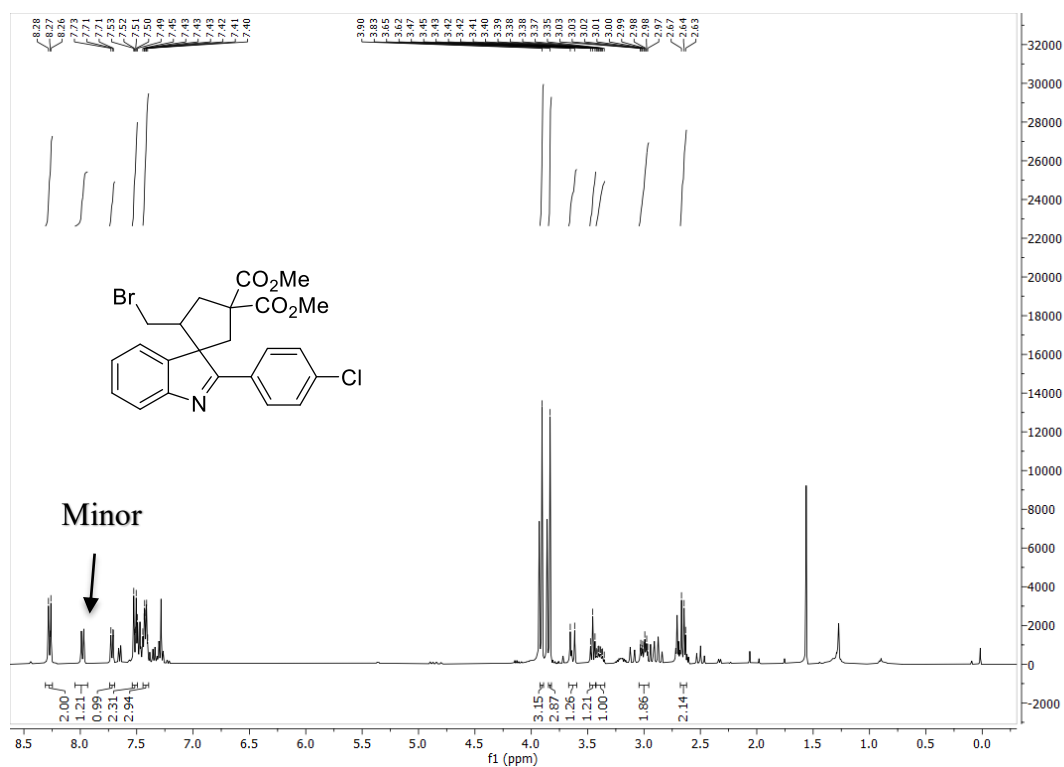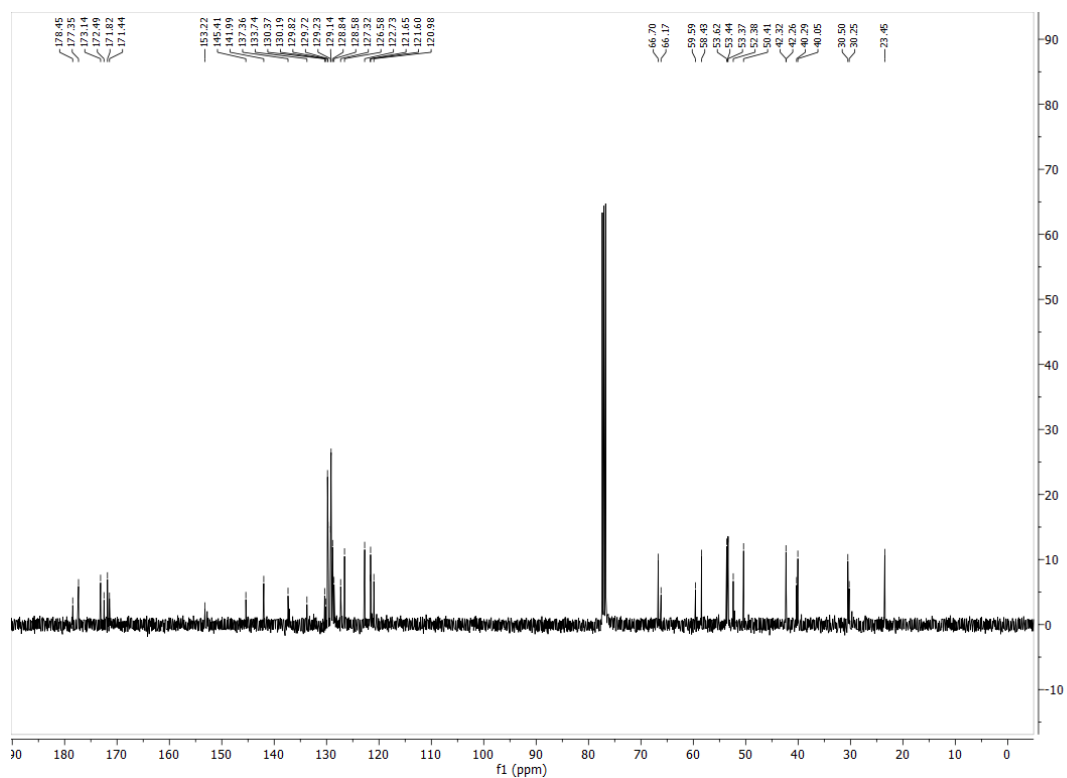



**3g**,  $^1\text{H}$  NMR (400 MHz, Chloroform- $d$ ) and  $^{13}\text{C}$  NMR (100 MHz, Chloroform- $d$ )

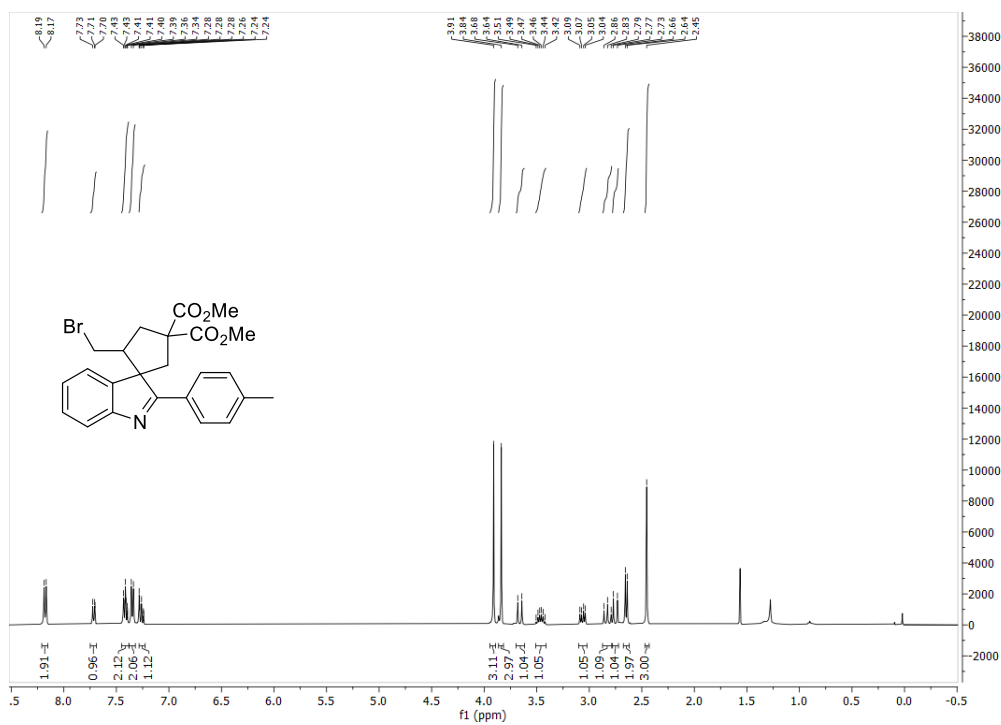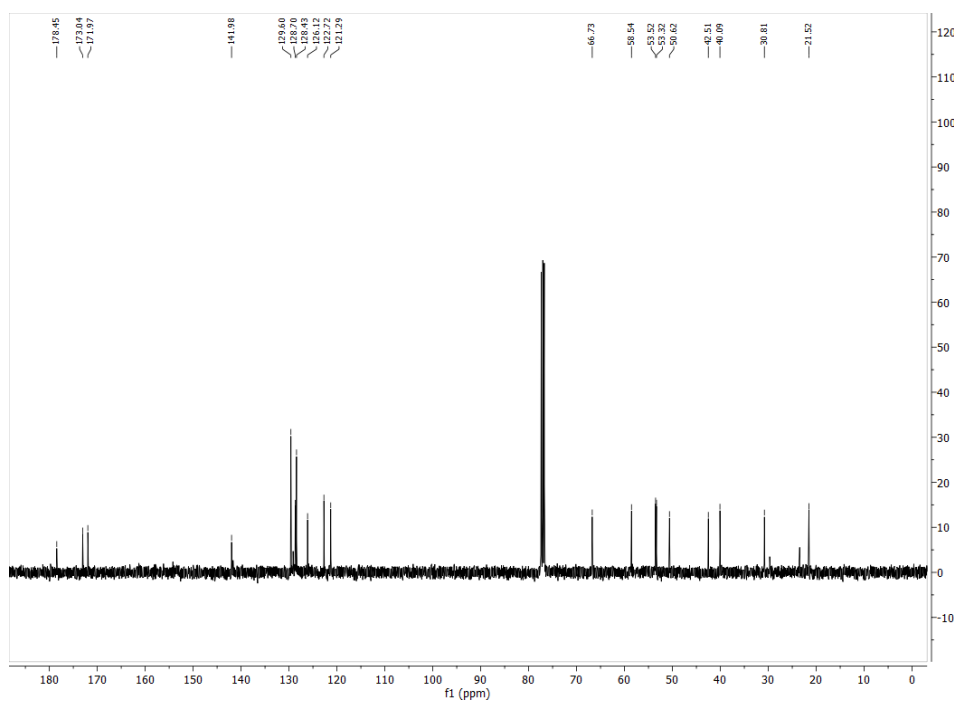

**5a**,  $^1\text{H}$  NMR (400 MHz, Chloroform-*d*) and  $^{13}\text{C}$  NMR (100 MHz, Chloroform-*d*)

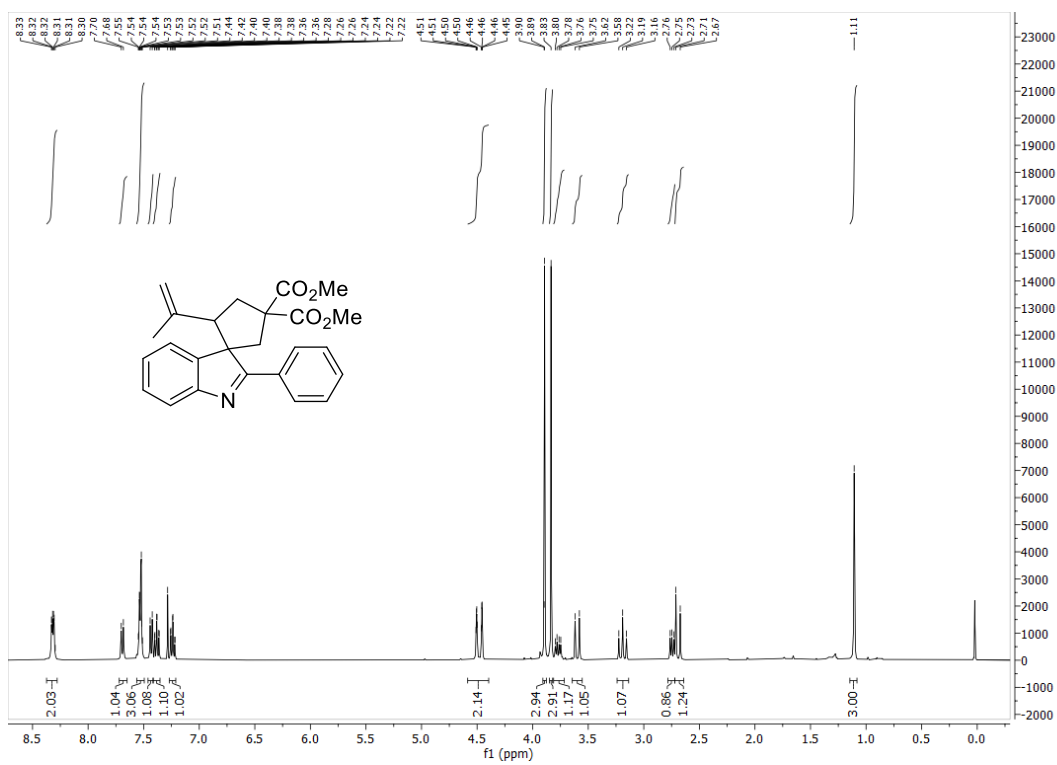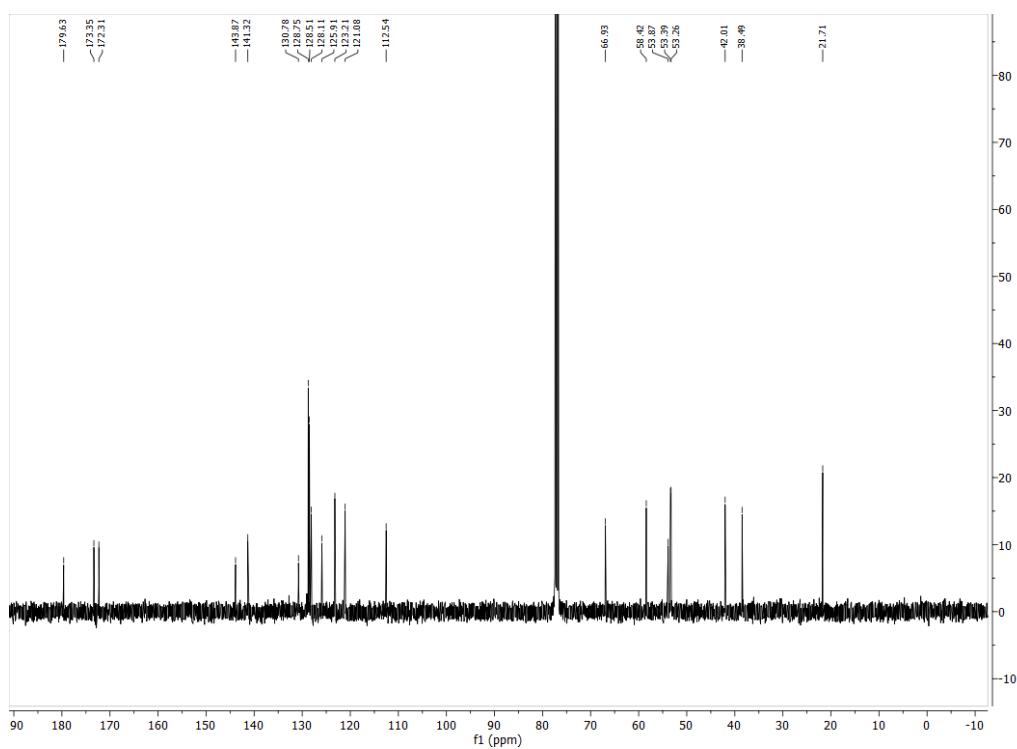

**5b**,  $^1\text{H}$  NMR (400 MHz, Chloroform-*d*) and  $^{13}\text{C}$  NMR (100 MHz, Chloroform-*d*)

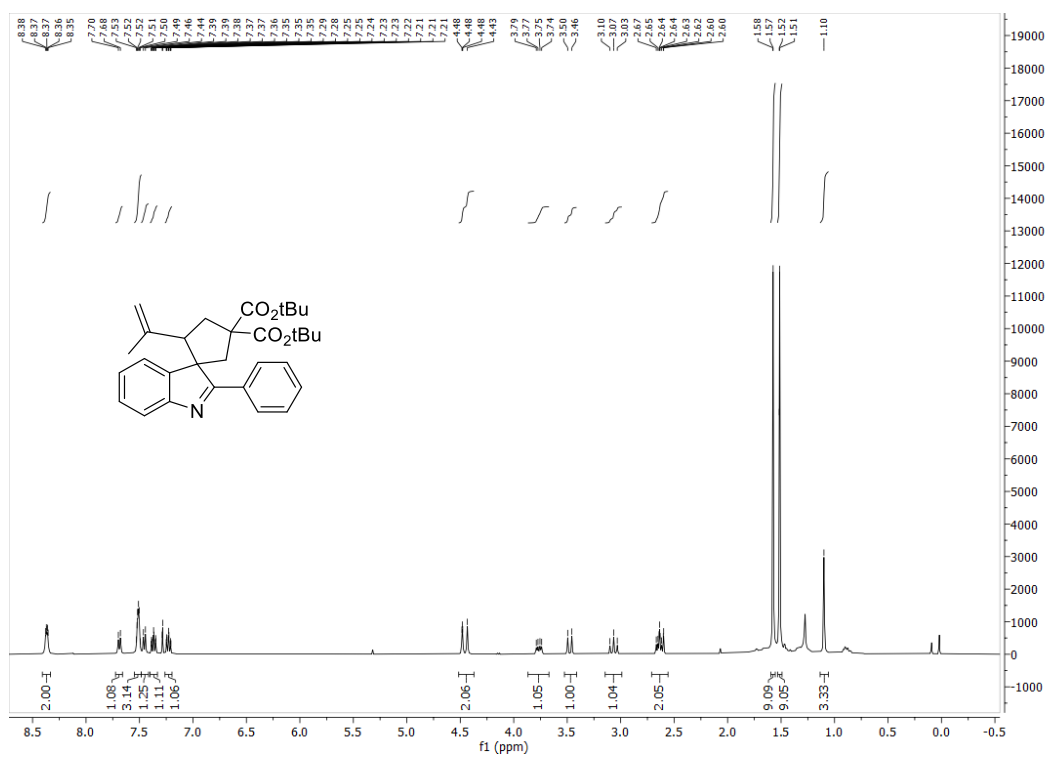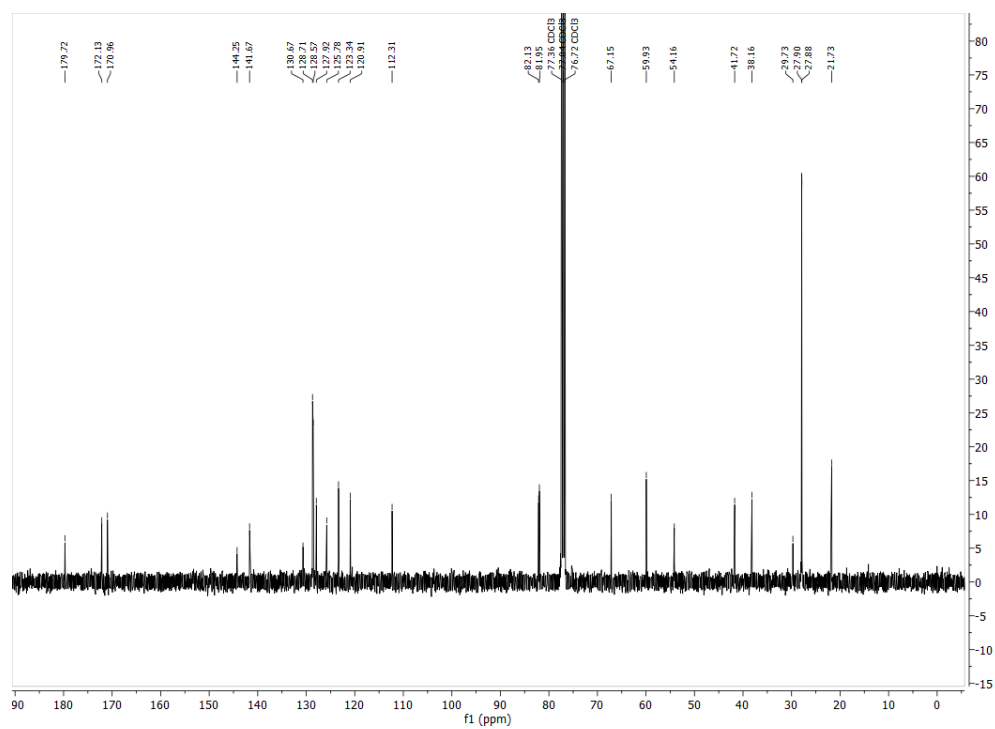

**5c**,  $^1\text{H}$  NMR (400 MHz, Chloroform-*d*) and  $^{13}\text{C}$  NMR (100 MHz, Chloroform-*d*)

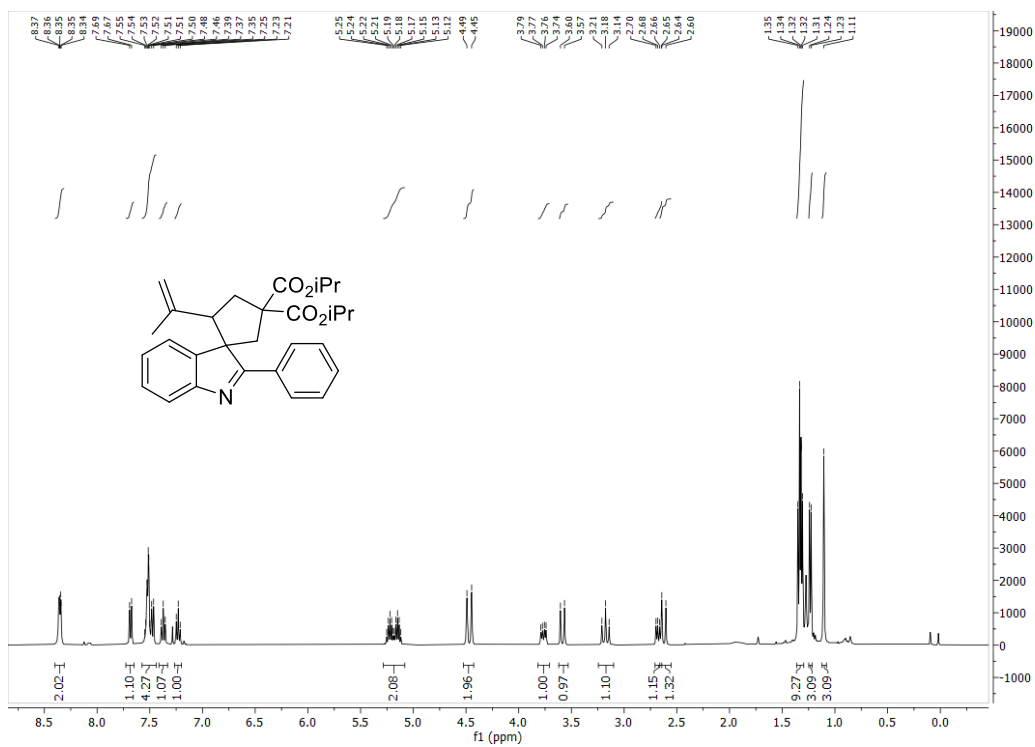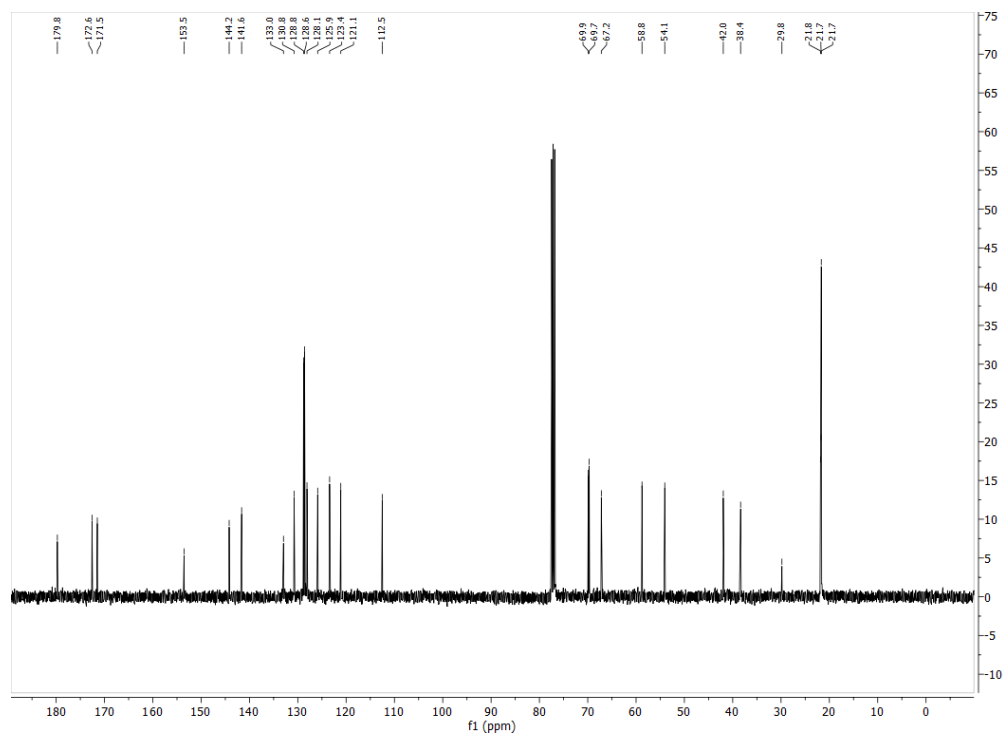

**5d**,  $^1\text{H}$  NMR (600 MHz, Chloroform- $d$ ) and  $^{13}\text{C}$  NMR (150 MHz, Chloroform- $d$ )

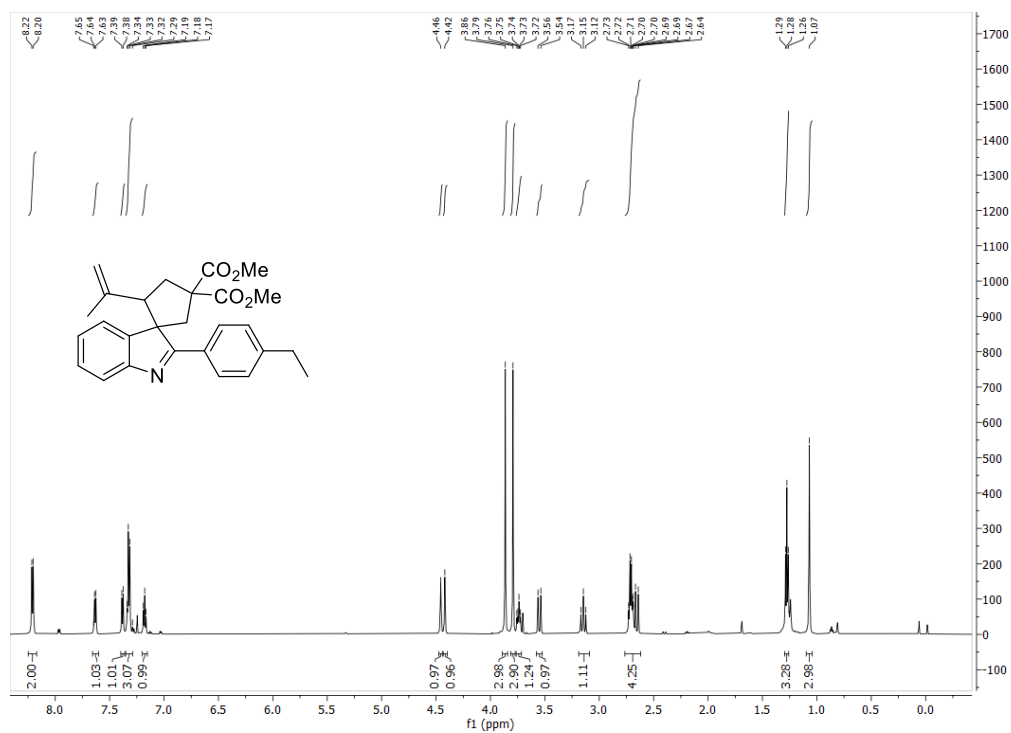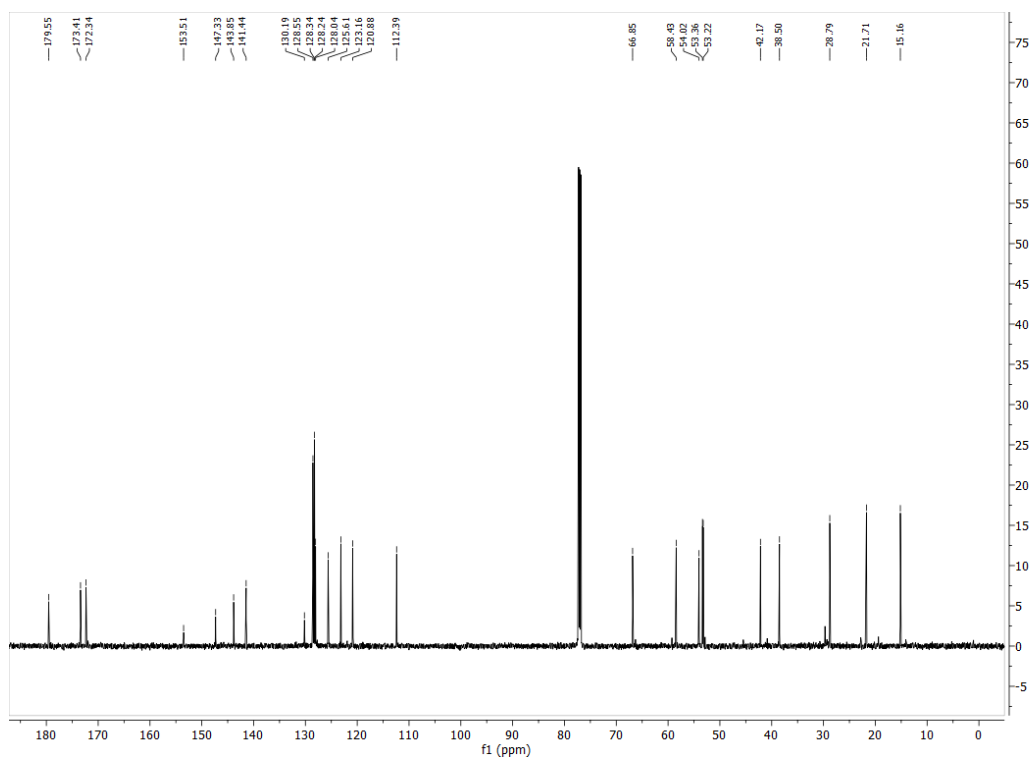

**5e**,  $^1\text{H}$  NMR (400 MHz, Chloroform-*d*) and  $^{13}\text{C}$  NMR (100 MHz, Chloroform-*d*)

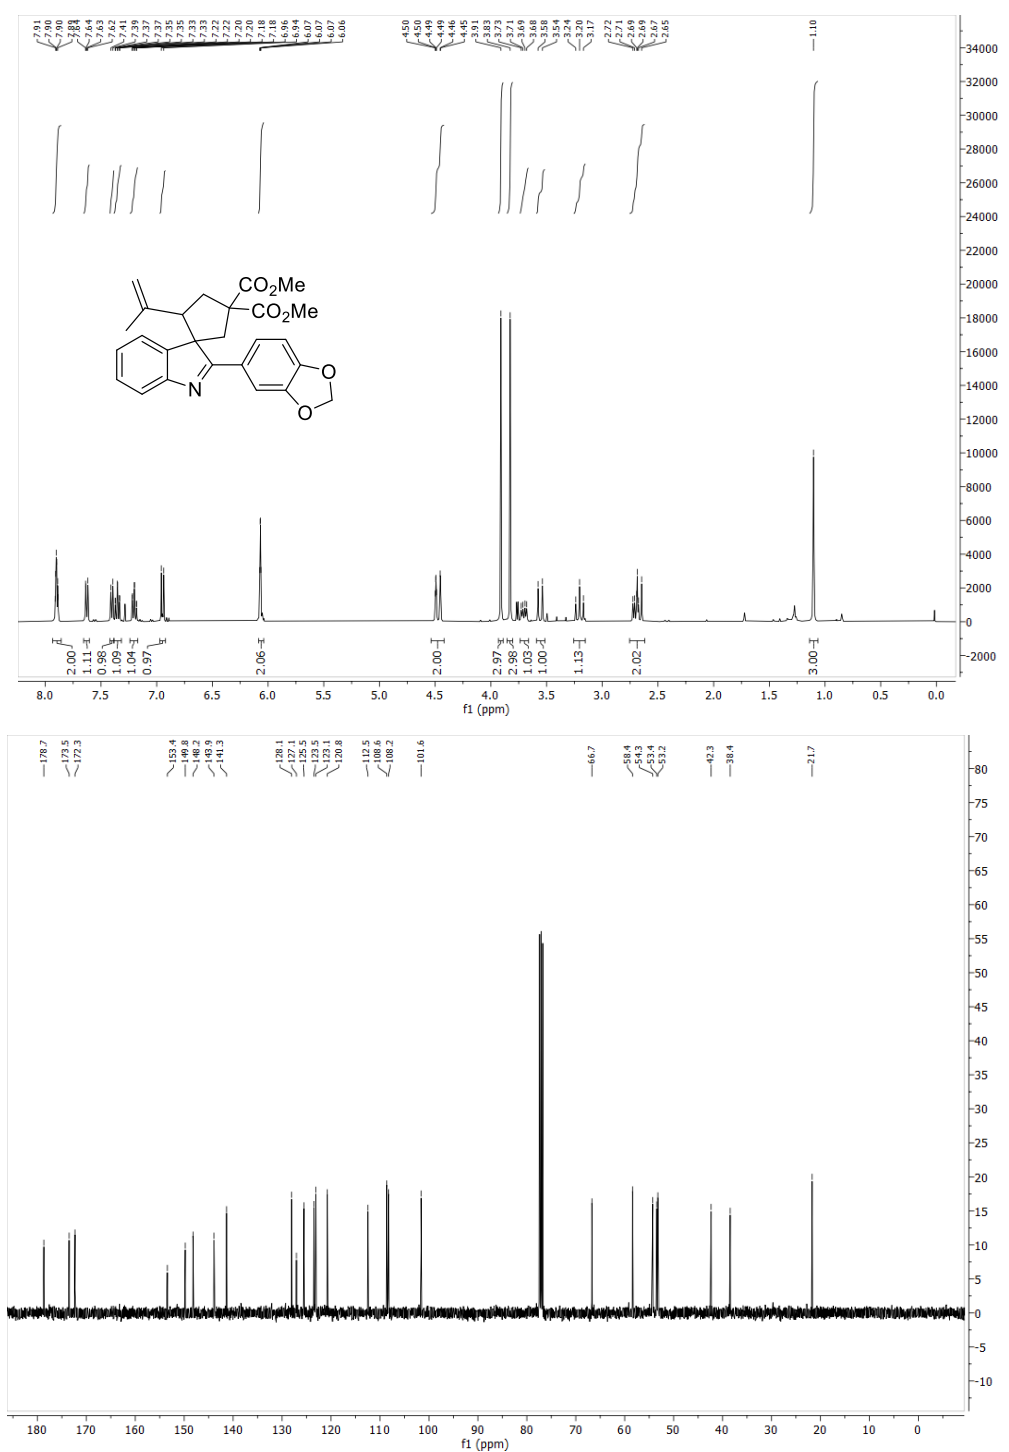

**5f**,  $^1\text{H}$  NMR (400 MHz, Chloroform-*d*) and  $^{13}\text{C}$  NMR (100 MHz, Chloroform-*d*)

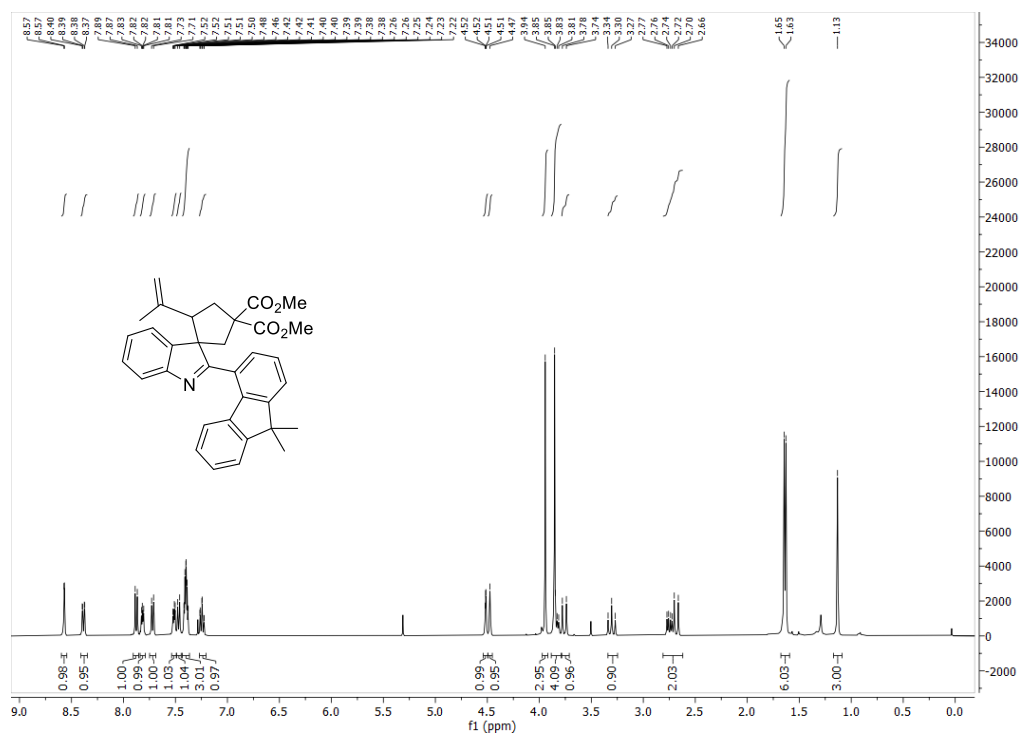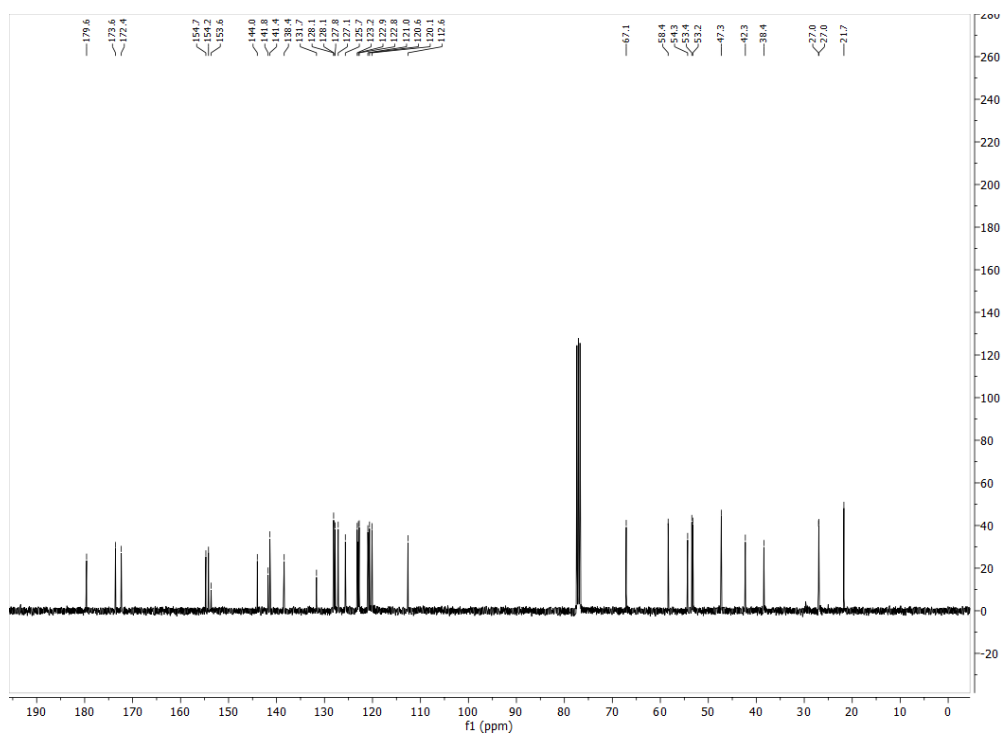

**5g, <sup>1</sup>H NMR (600 MHz, Chloroform-*d*) and <sup>13</sup>C NMR (100 MHz, Chloroform-*d*)**

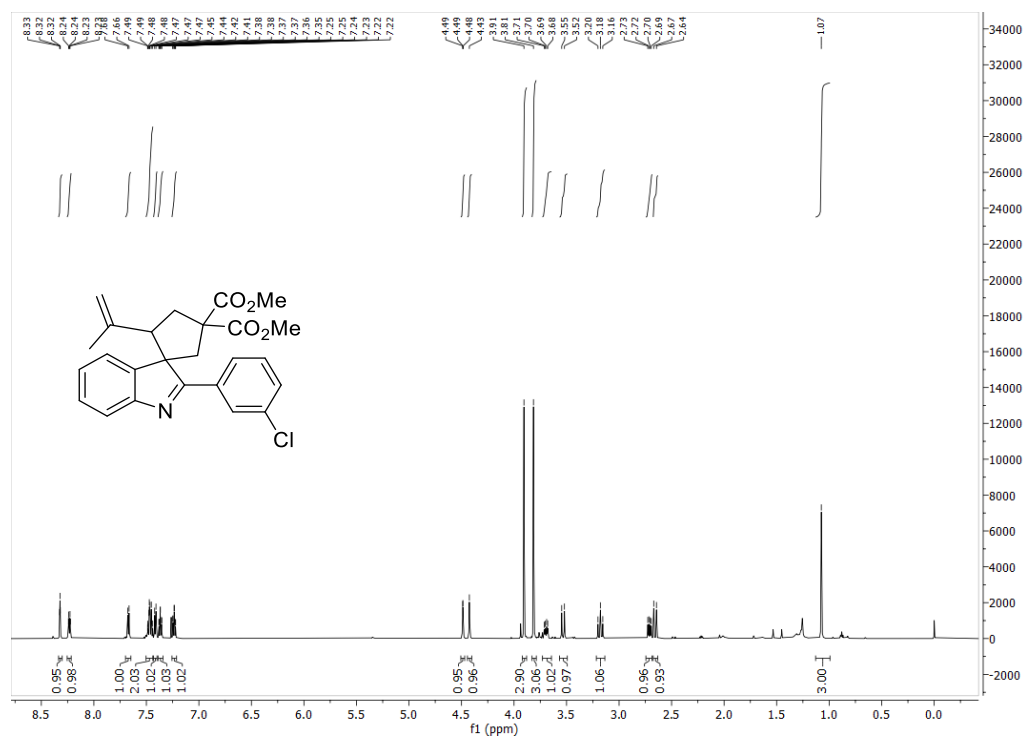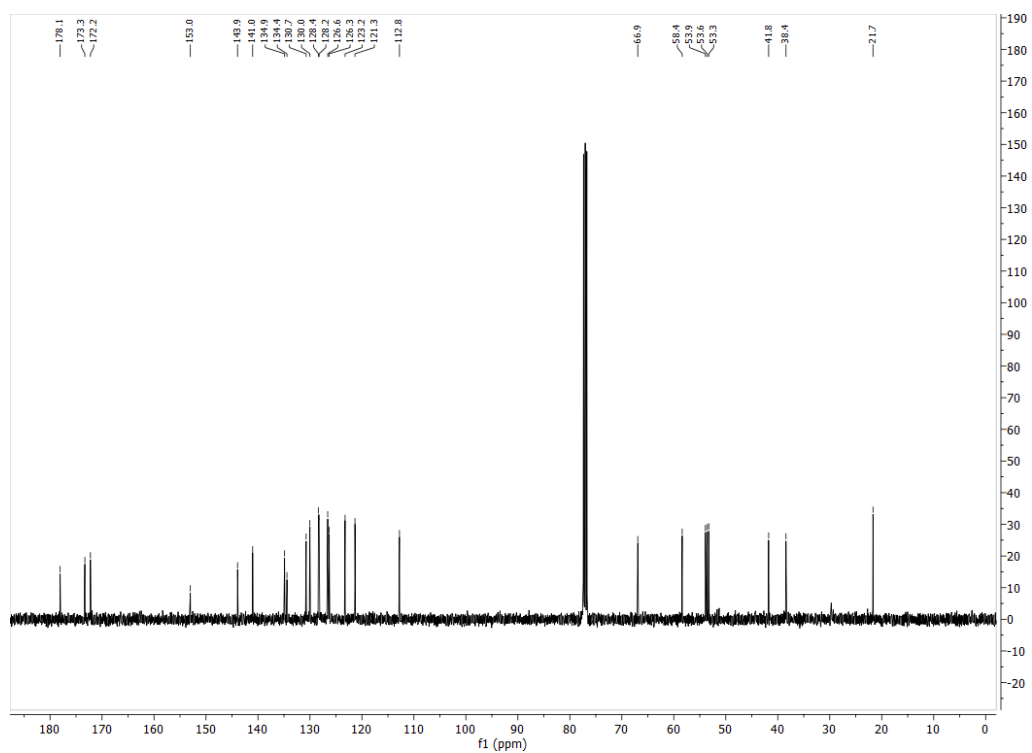



**5h, <sup>1</sup>H NMR (400 MHz, Chloroform-*d*) and <sup>13</sup>C NMR (125 MHz, Chloroform-*d*)**

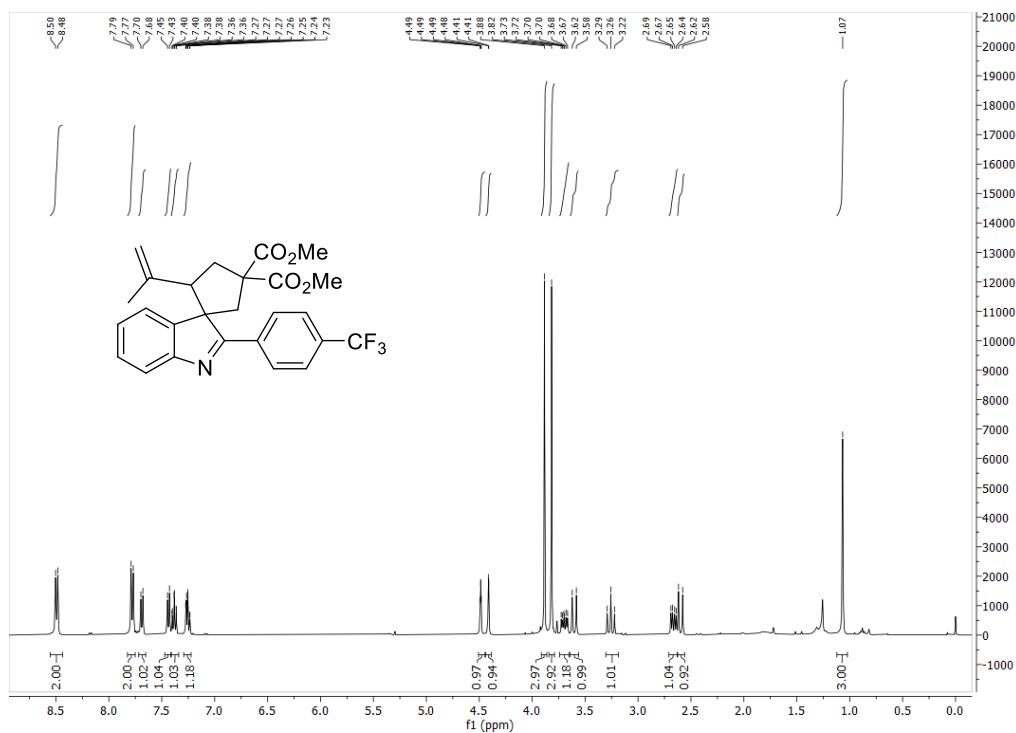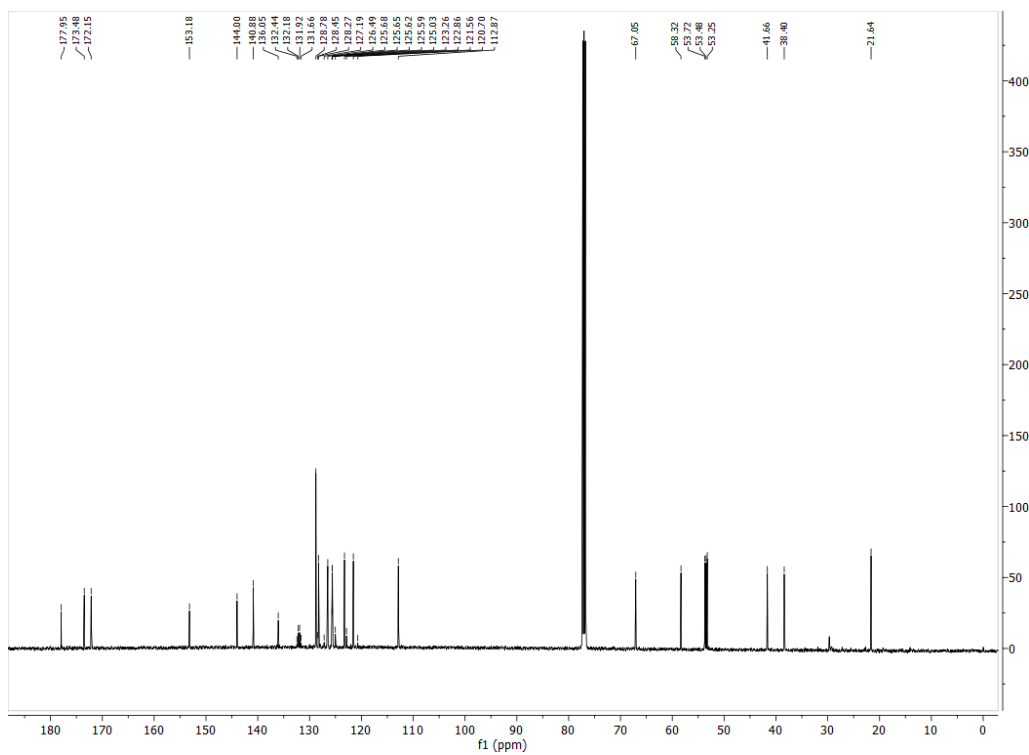

**5i**,  $^1\text{H}$  NMR (400 MHz, Chloroform-*d*) and  $^{13}\text{C}$  NMR (125 MHz, Chloroform-*d*)

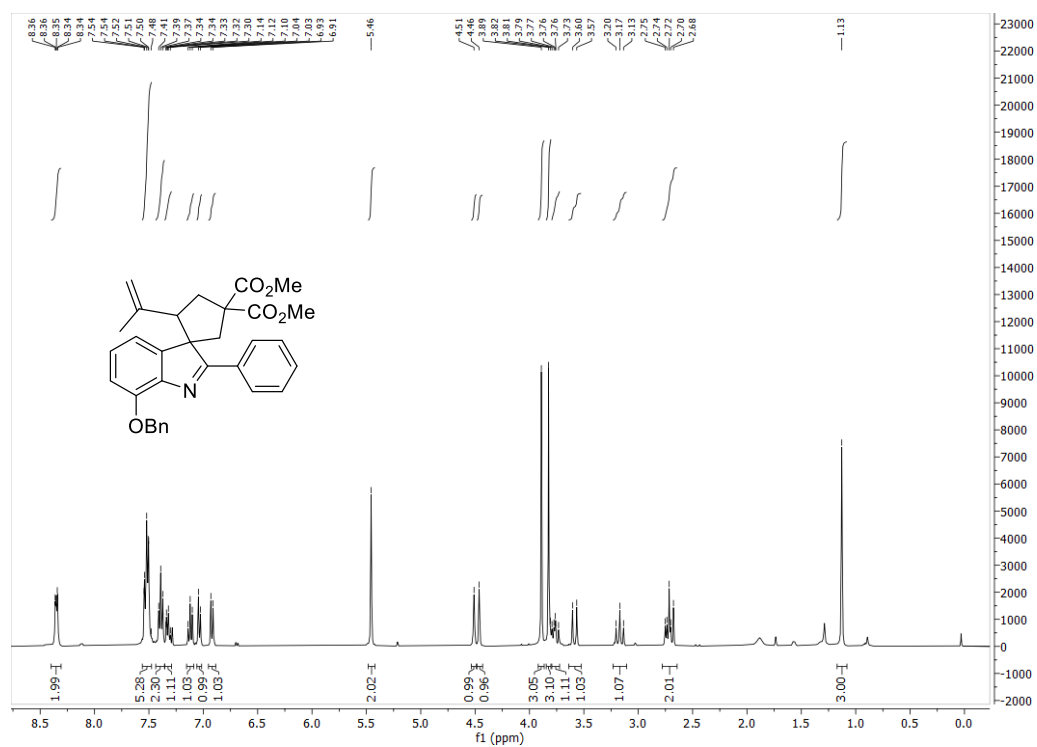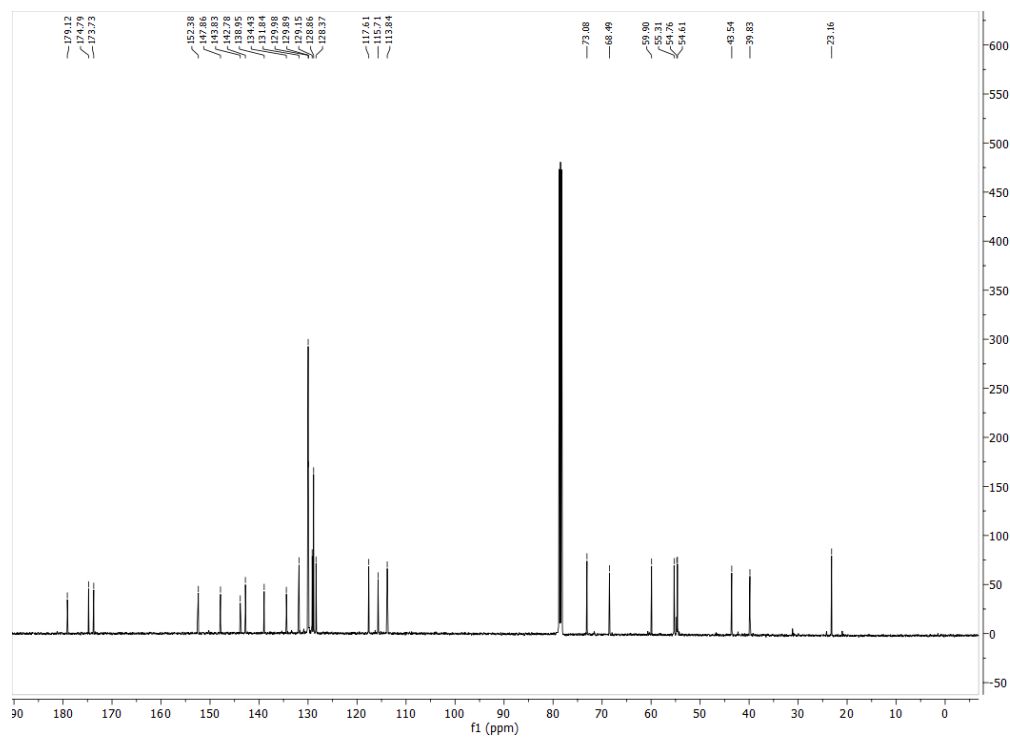

**5j**,  $^1\text{H}$  NMR (600 MHz, Chloroform-*d*) and  $^{13}\text{C}$  NMR (100 MHz, Chloroform-*d*)

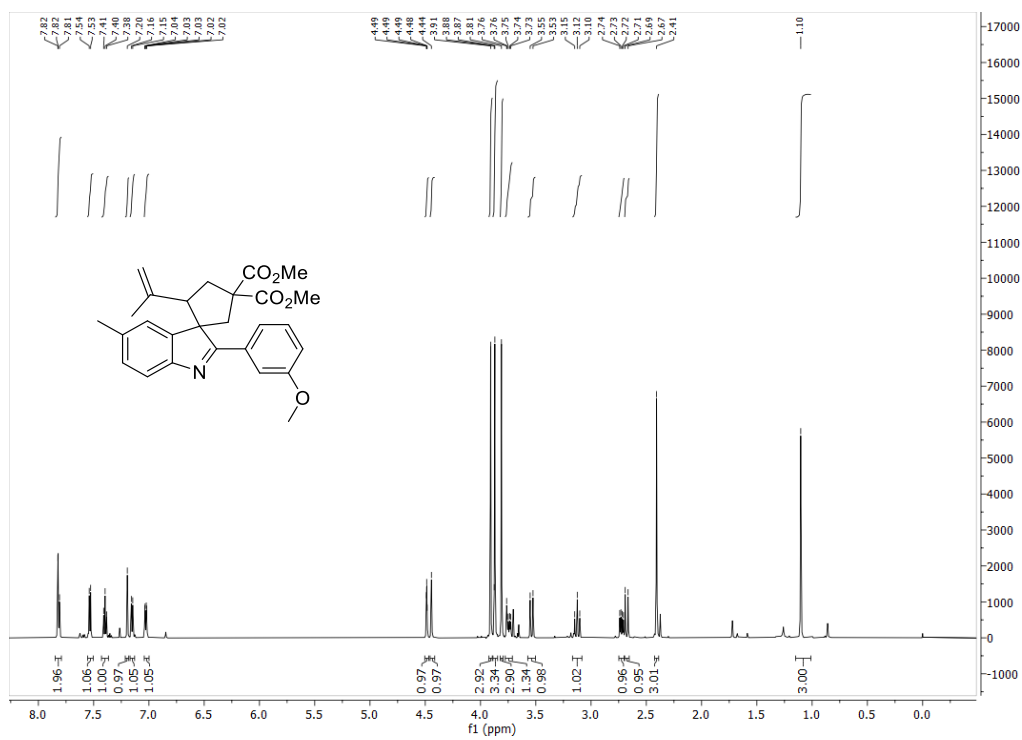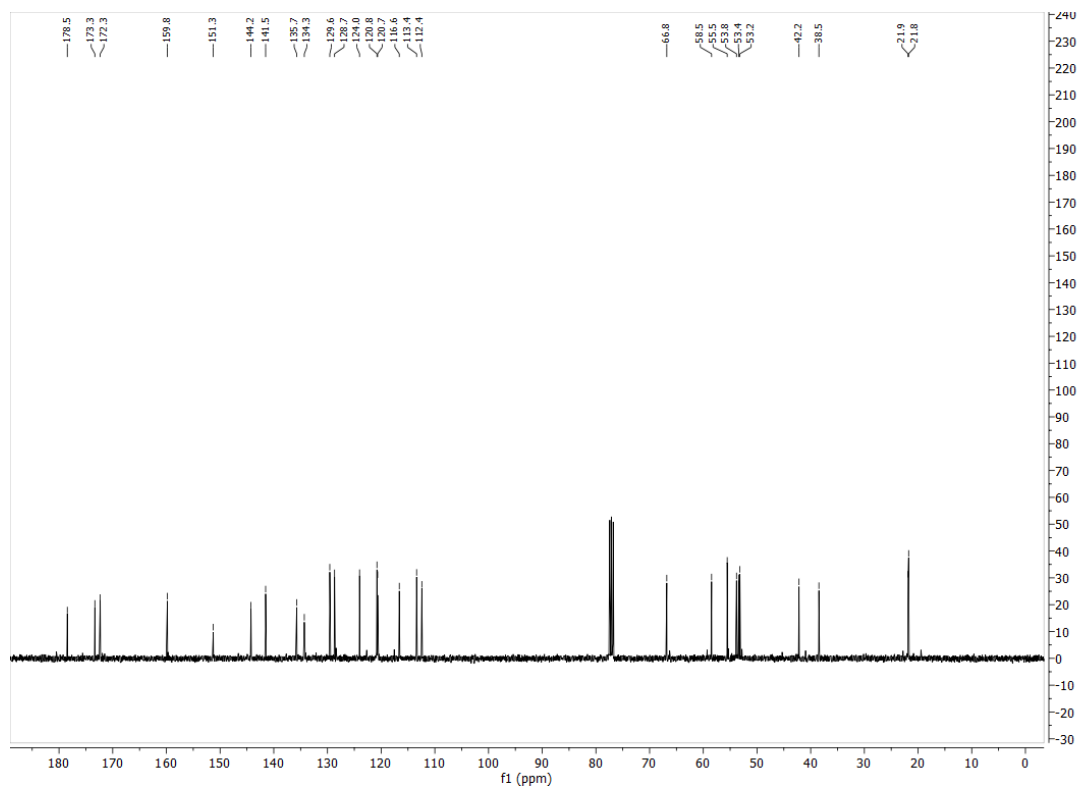

**5k**,  $^1\text{H}$  NMR (400 MHz, Chloroform-*d*) and  $^{13}\text{C}$  NMR (125 MHz, Chloroform-*d*)

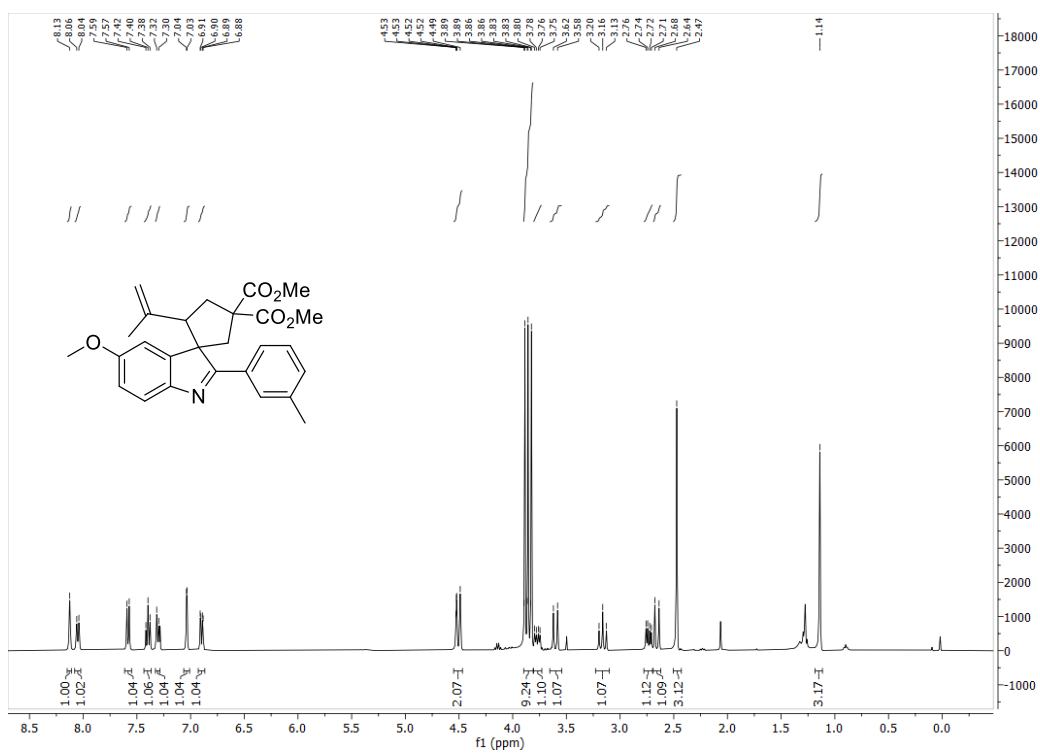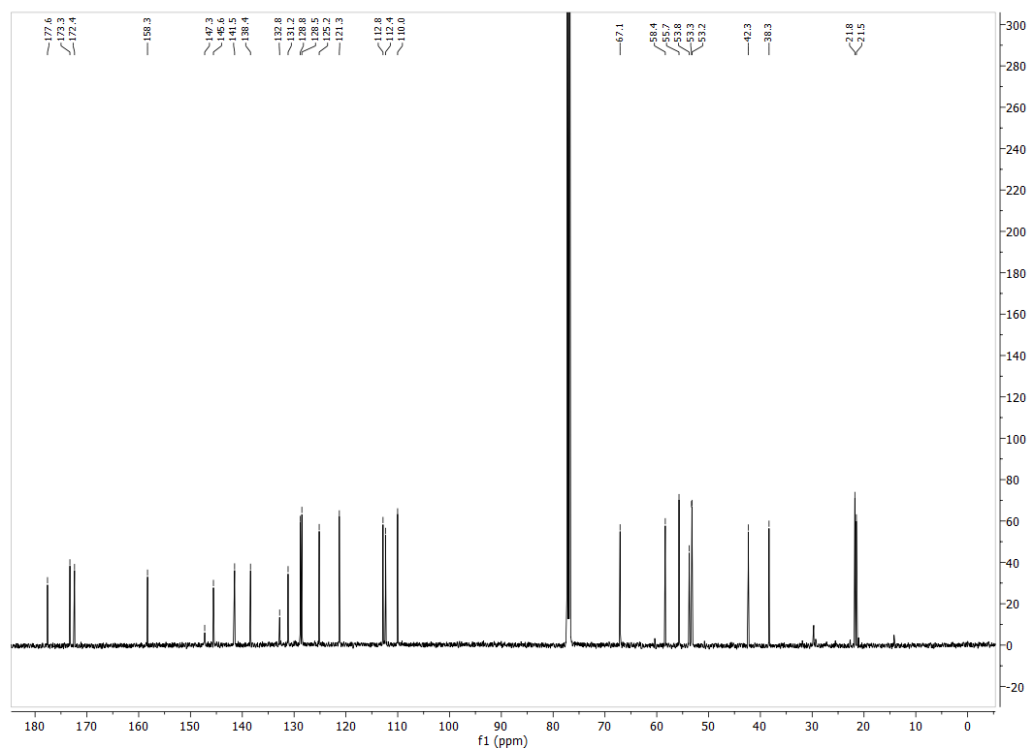

6, <sup>1</sup>H NMR (600 MHz, Chloroform-*d*) and <sup>13</sup>C NMR (125 MHz, Chloroform-*d*)

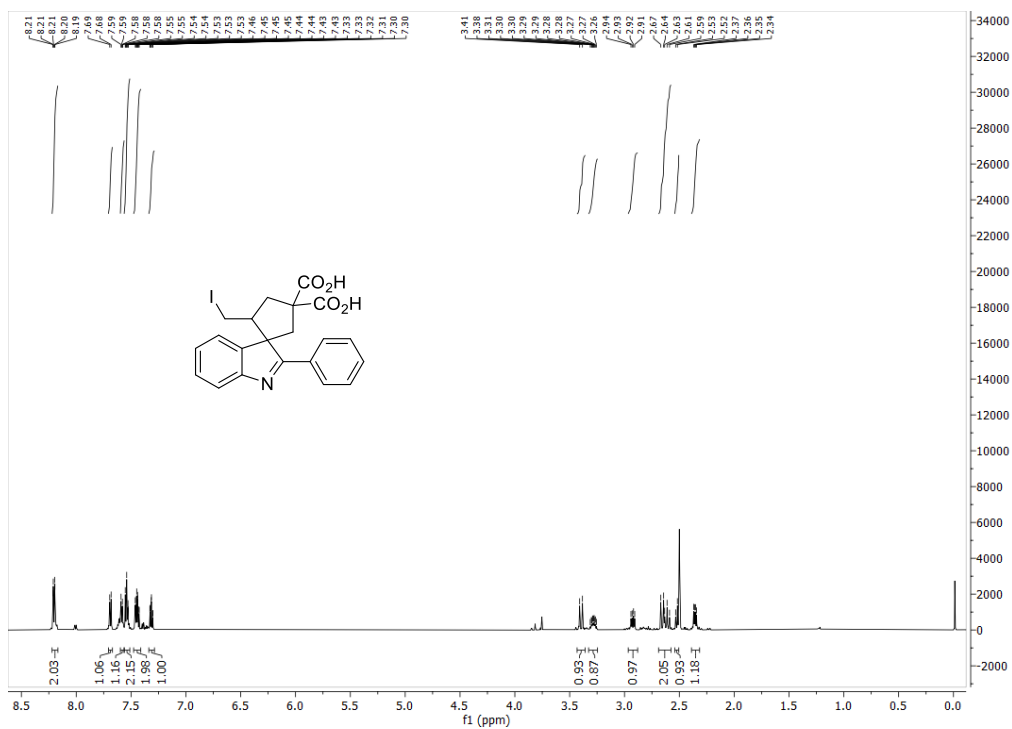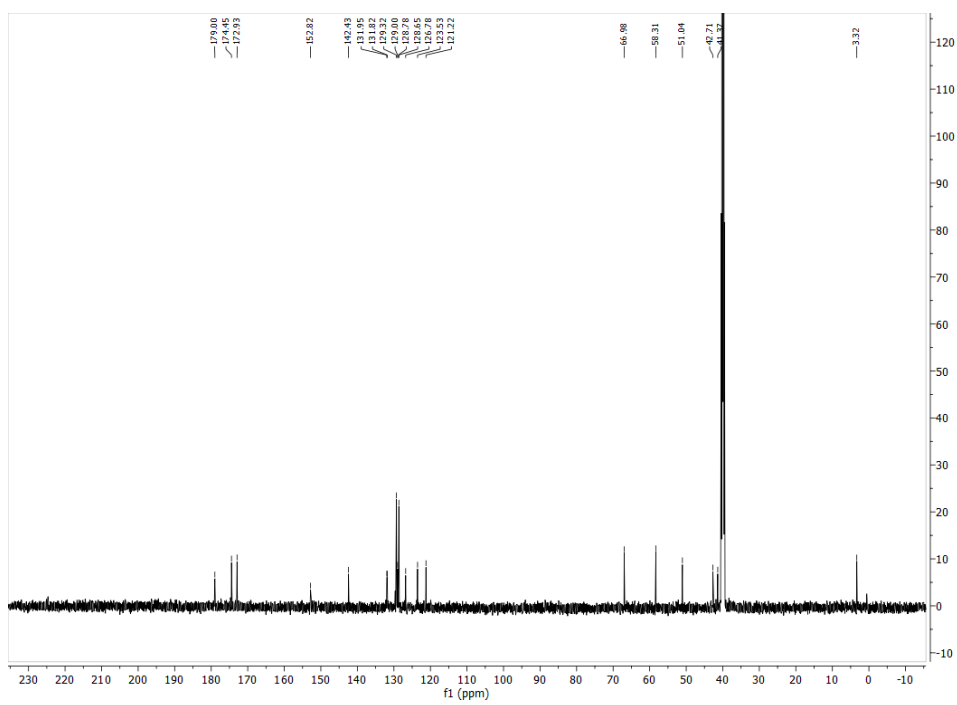

7, <sup>1</sup>H NMR (400 MHz, Chloroform-d) and <sup>13</sup>C NMR (125 MHz, Chloroform-d)

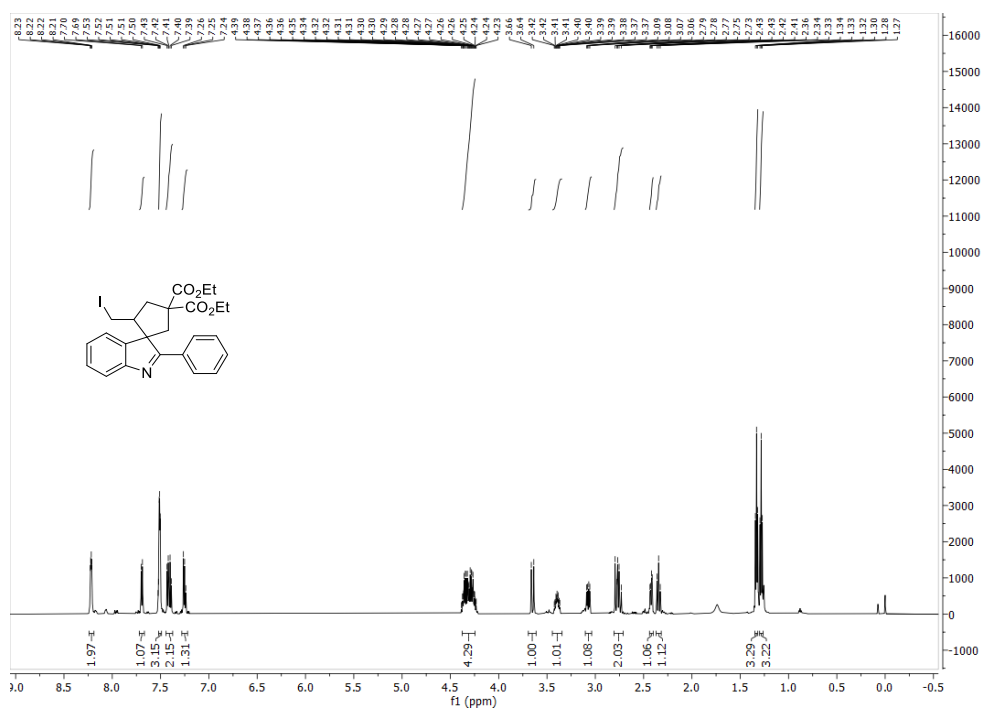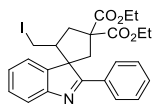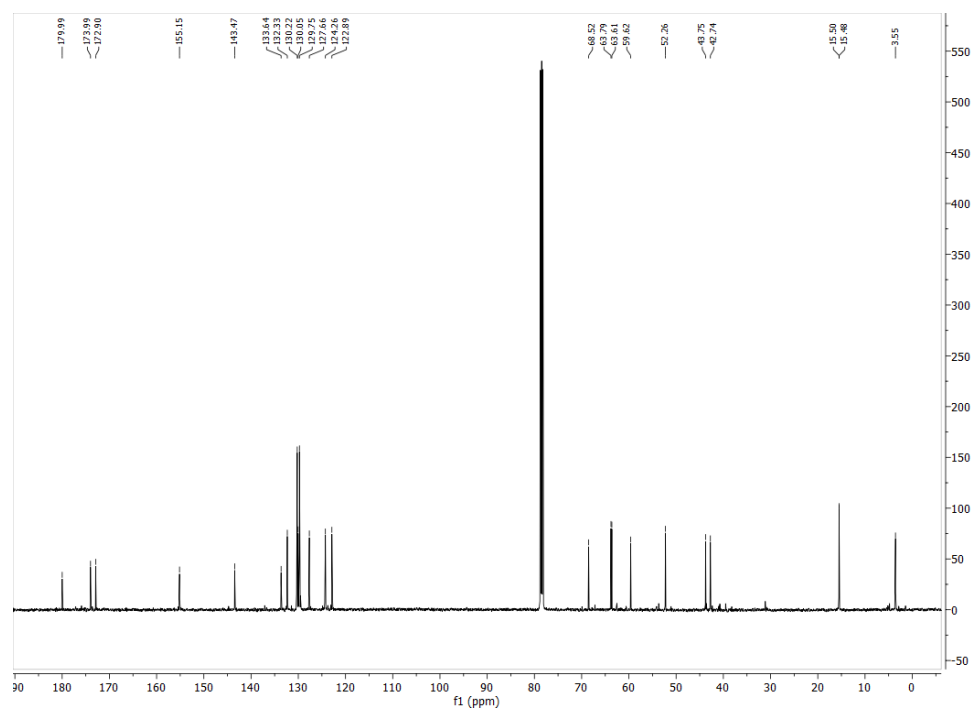

**8, <sup>1</sup>H NMR (400 MHz, Chloroform-d) and <sup>13</sup>C NMR (150 MHz, Chloroform-d)**

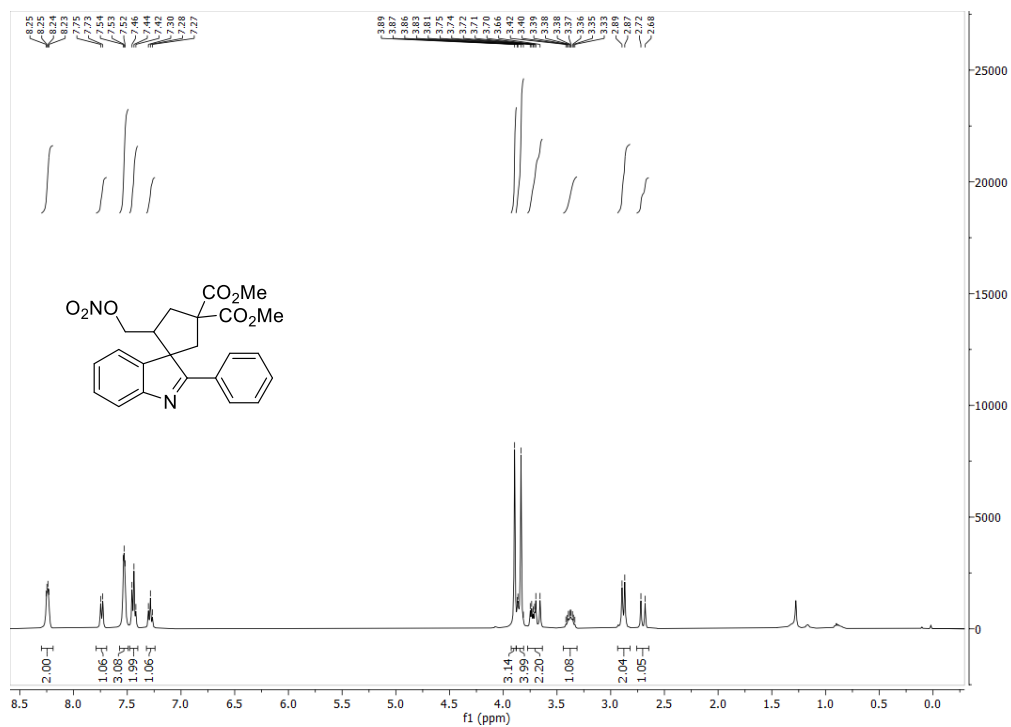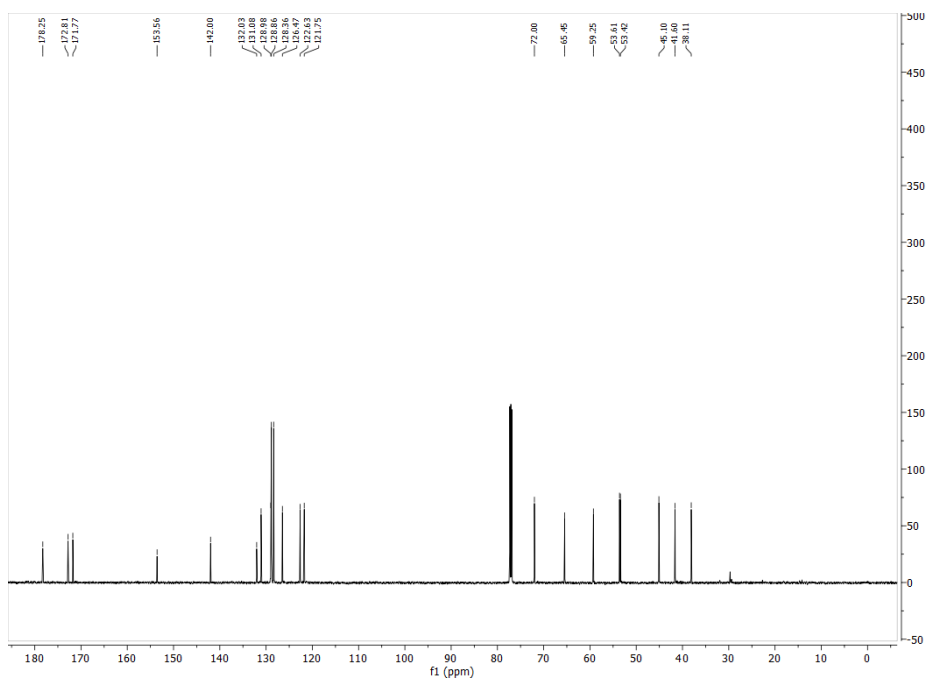

9, <sup>1</sup>H NMR (600 MHz, Chloroform-*d*) and <sup>13</sup>C NMR (125 MHz, Chloroform-*d*)

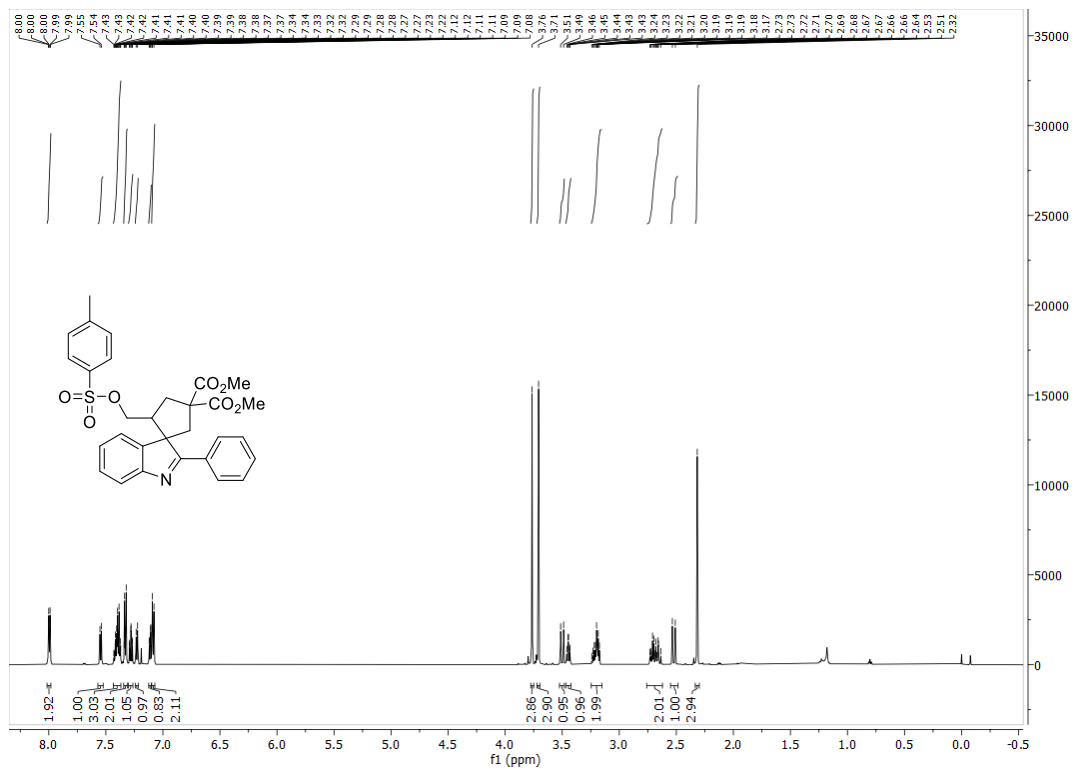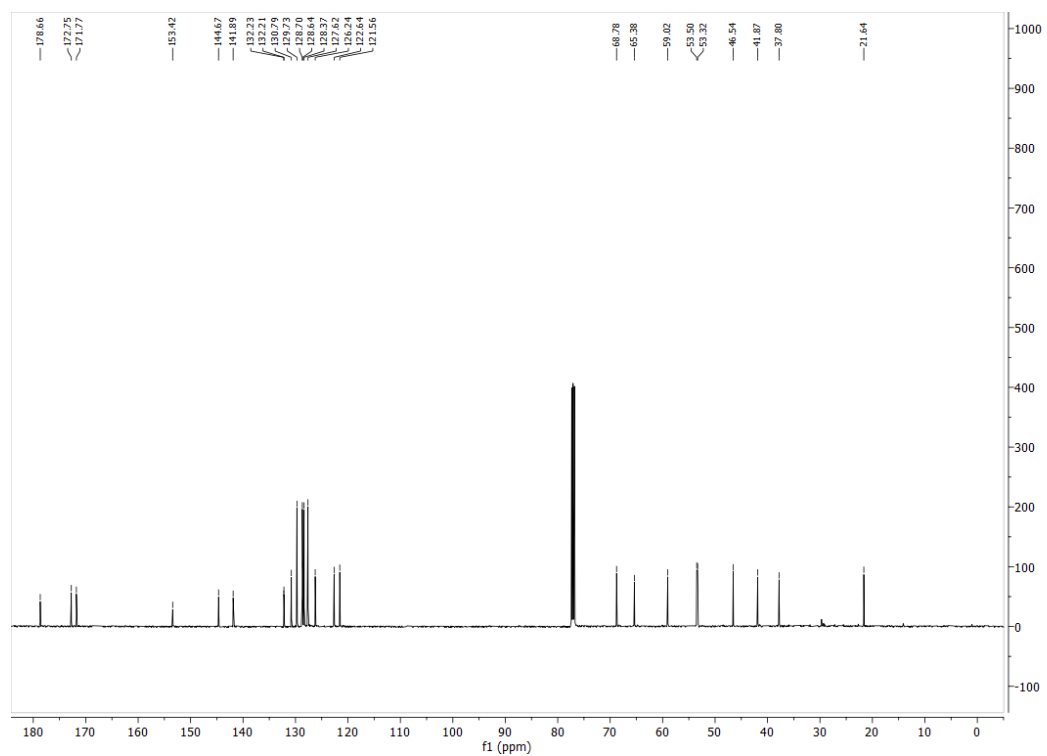



**10, <sup>1</sup>H NMR (400 MHz, Chloroform-*d*) and <sup>13</sup>C NMR (125 MHz, Chloroform-*d*)**

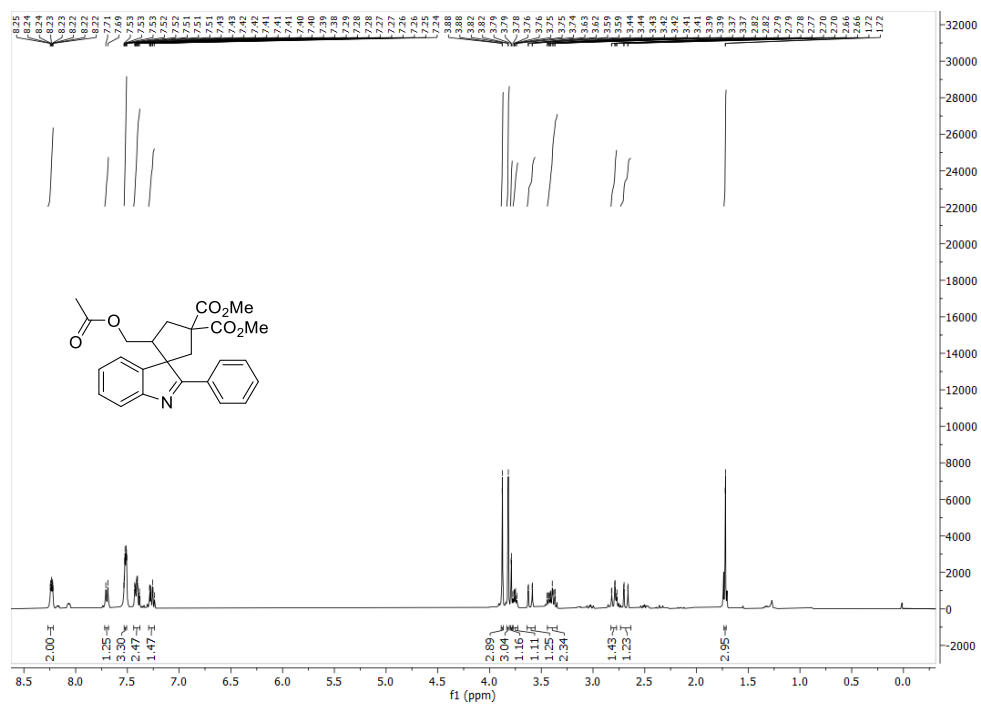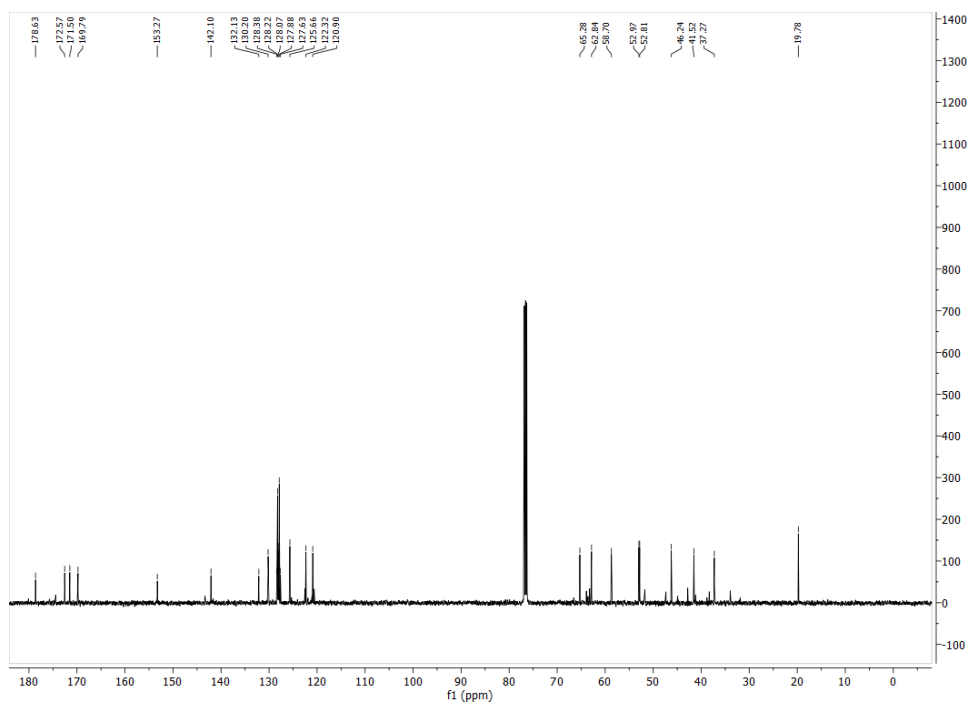

**11, <sup>1</sup>H NMR (400 MHz, Chloroform-*d*) and <sup>13</sup>C NMR (100 MHz, Chloroform-*d*)**

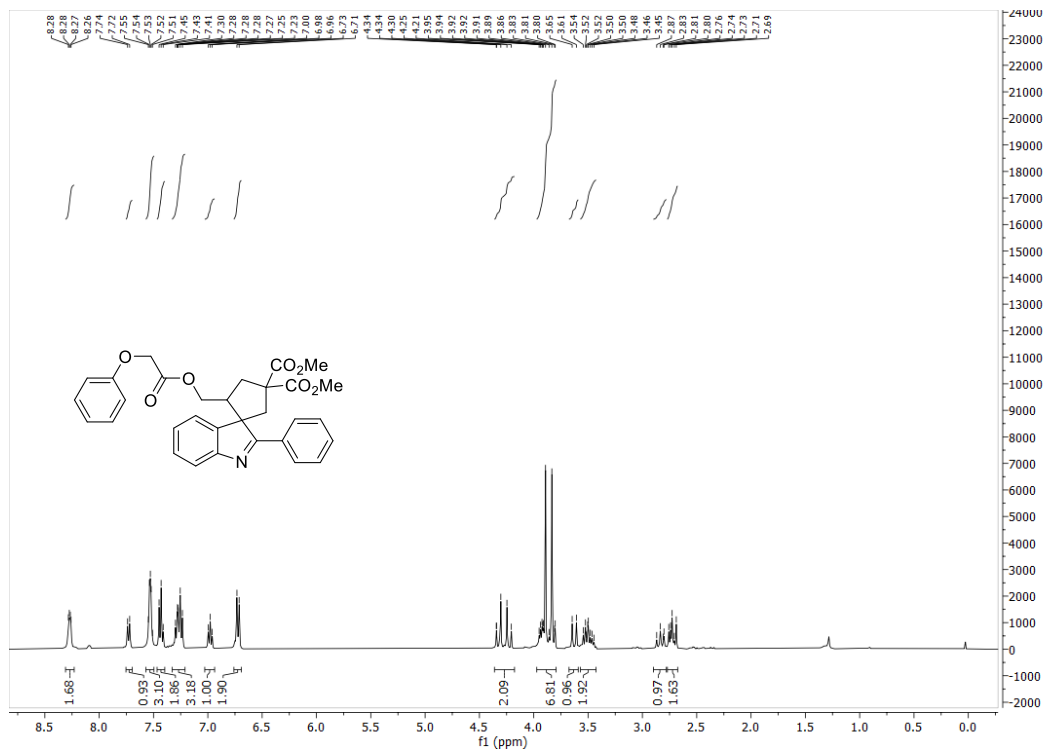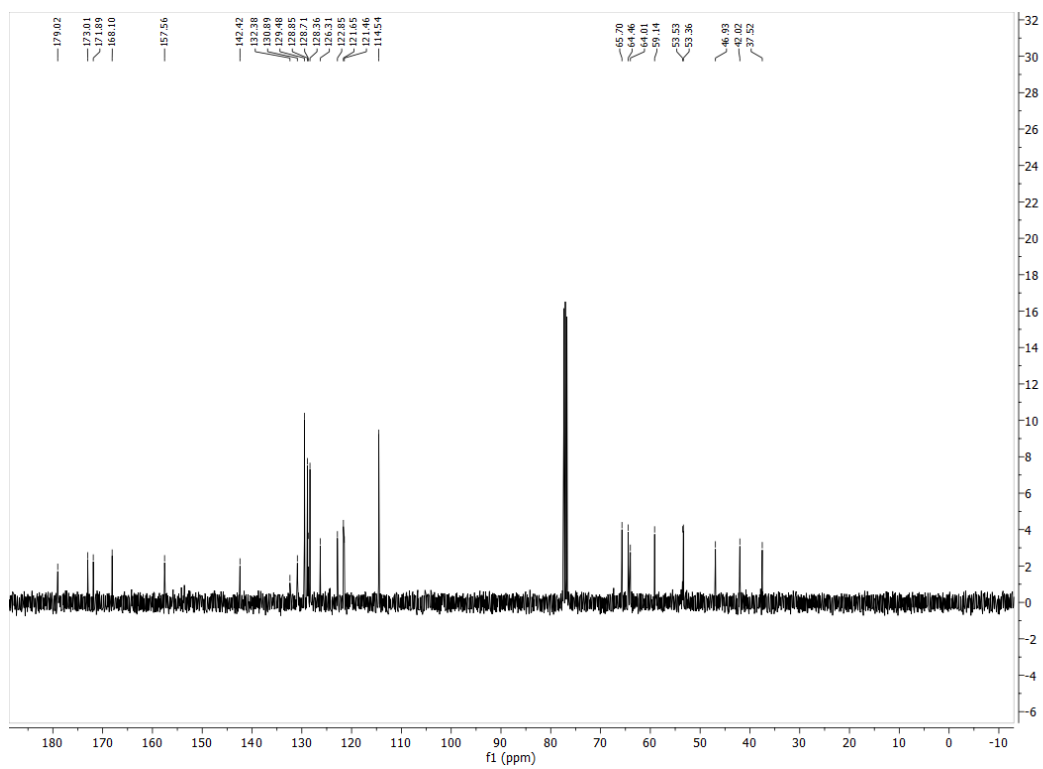

12, <sup>1</sup>H NMR (600 MHz, Chloroform-*d*) and <sup>13</sup>C NMR (125 MHz, Chloroform-*d*)

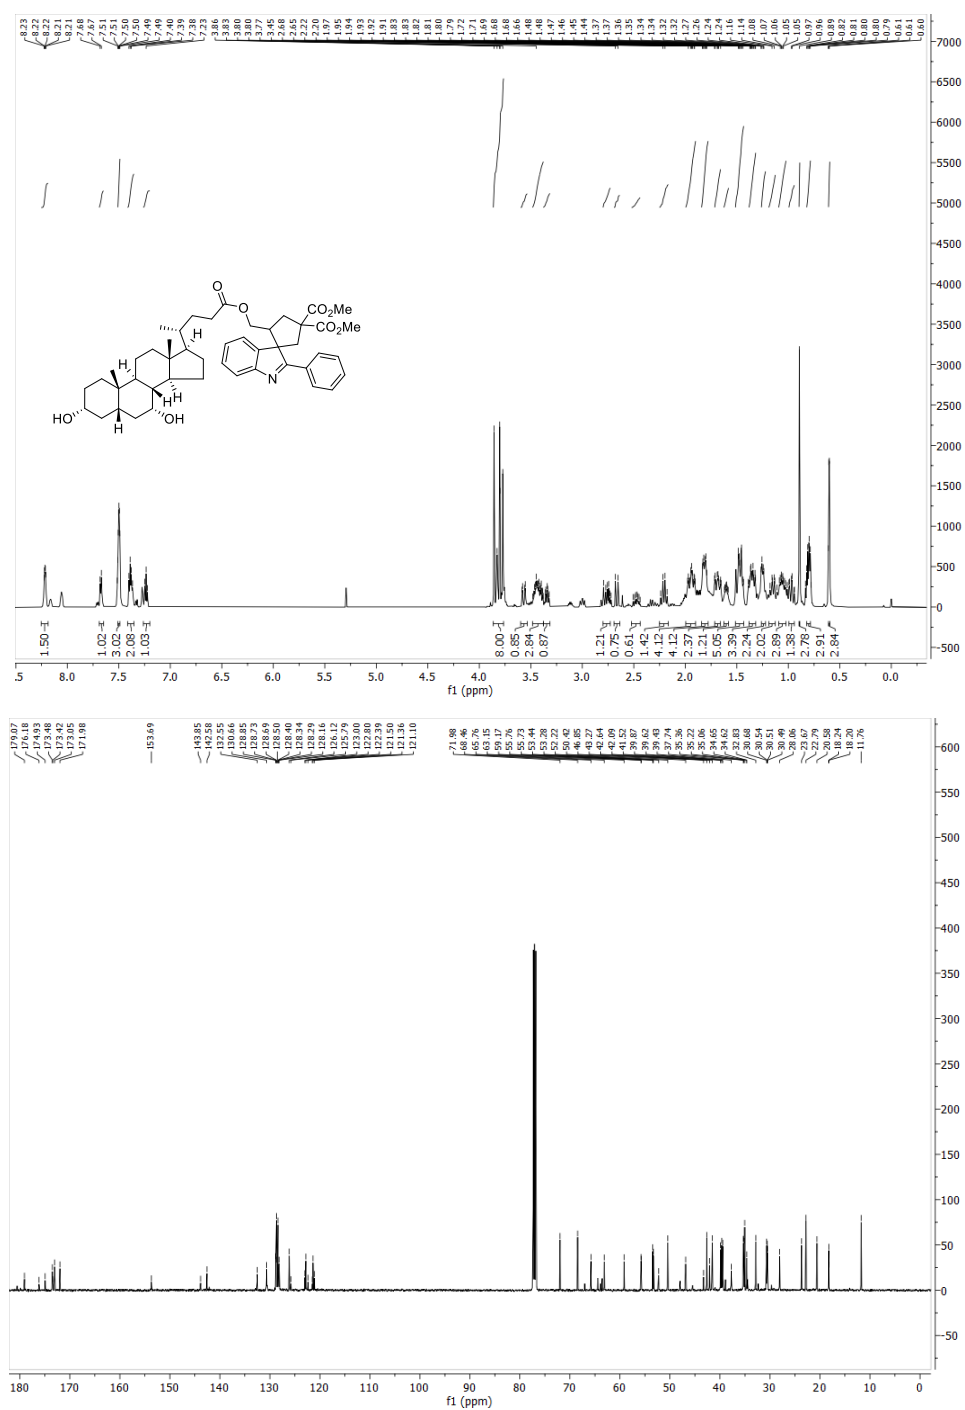

## Qualitative Analysis Report

|                        |                                        |                               |                             |
|------------------------|----------------------------------------|-------------------------------|-----------------------------|
| <b>Data Filename</b>   | ESI202104214.d                         | <b>Sample Name</b>            | B6-WXH-100-4                |
| <b>Sample ID</b>       |                                        | <b>Position</b>               | P1-F7                       |
| <b>Instrument Name</b> | Agilent G6520 Q-TOF                    | <b>Acq Method</b>             | 20160322_MS_ESIH_POS_1min.m |
| <b>Acquired Time</b>   | 9/10/2021 19:30:41                     | <b>IRM Calibration Status</b> | Success                     |
| <b>DA Method</b>       | small molecular data analysis method.m | <b>Comment</b>                | ESI202104214.d              |

### User Spectra

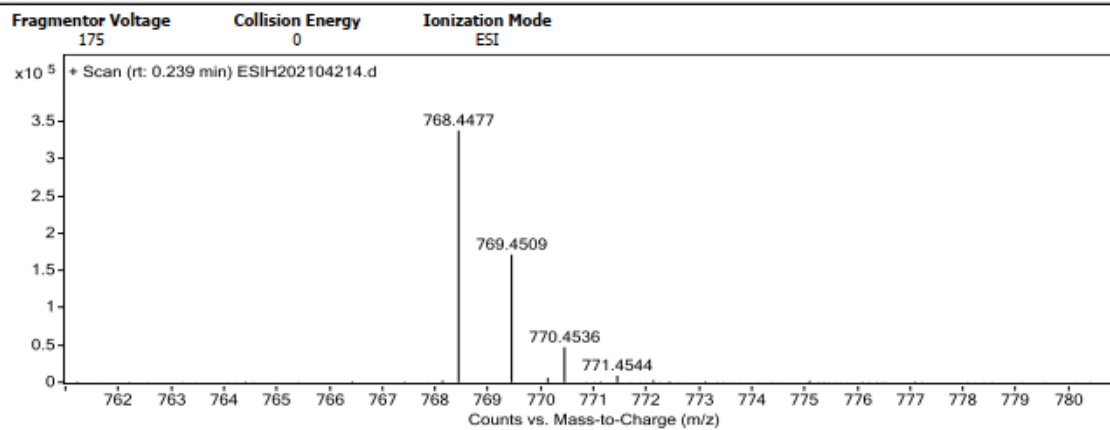

### Formula Calculator Results

| m/z      | Calc m/z | Diff (mDa) | Diff (ppm) | Ion Formula  | Ion                |
|----------|----------|------------|------------|--------------|--------------------|
| 768.4477 | 768.447  | -0.74      | -0.96      | C47 H62 N O8 | (M+H) <sup>+</sup> |

--- End Of Report ---



## Qualitative Analysis Report

|                        |                                        |                               |                             |
|------------------------|----------------------------------------|-------------------------------|-----------------------------|
| <b>Data Filename</b>   | ESI202104228.d                         | <b>Sample Name</b>            | B6-WXH-100-7                |
| <b>Sample ID</b>       |                                        | <b>Position</b>               | P1-A5                       |
| <b>Instrument Name</b> | Agilent G6520 Q-TOF                    | <b>Acq Method</b>             | 20160322_MS_ESIH_POS_1min.m |
| <b>Acquired Time</b>   | 9/14/2021 19:36:28                     | <b>IRM Calibration Status</b> | Success                     |
| <b>DA Method</b>       | small molecular data analysis method.m | <b>Comment</b>                | ESI2 by zhuzhenyun          |

**User Spectra**

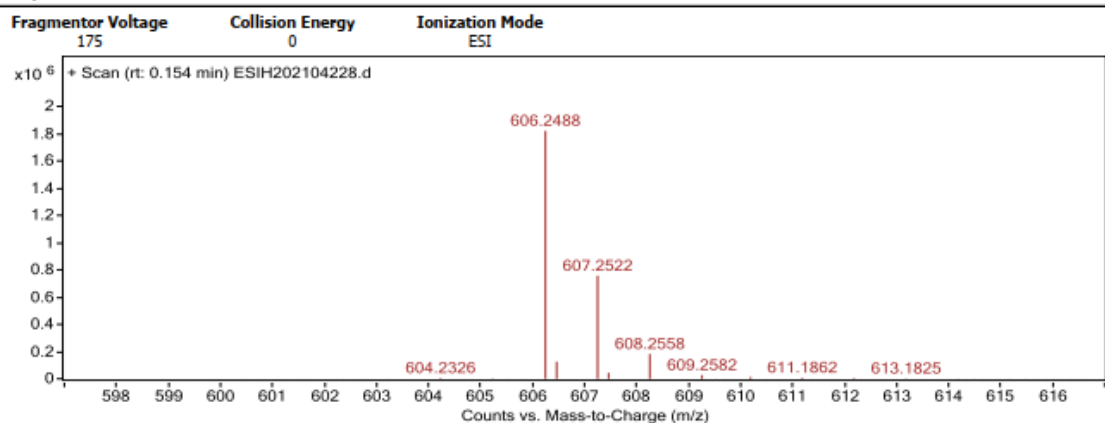

**Formula Calculator Results**

| m/z      | Calc m/z | Diff (mDa) | Diff (ppm) | Ion Formula  | Ion                |
|----------|----------|------------|------------|--------------|--------------------|
| 606.2488 | 606.2486 | -0.12      | -0.2       | C37 H36 N O7 | (M+H) <sup>+</sup> |

--- End Of Report ---

14, <sup>1</sup>H NMR (400 MHz, Chloroform-d) and <sup>13</sup>C NMR (100 MHz, Chloroform-d)

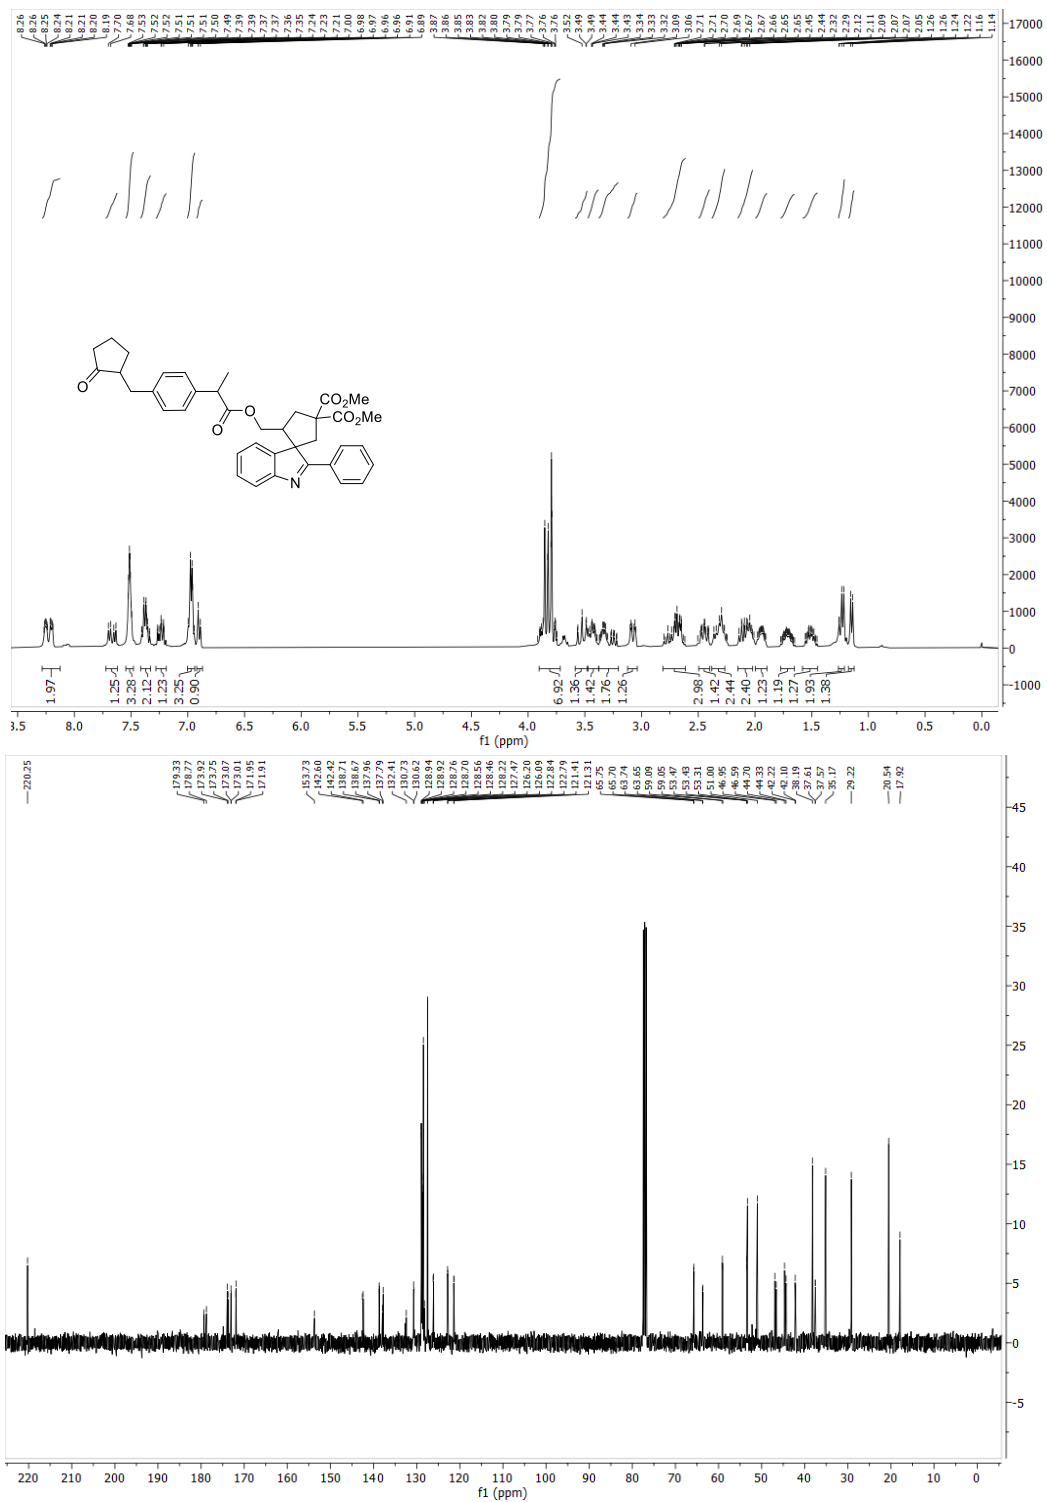

## Qualitative Analysis Report

|                        |                                        |                               |                             |
|------------------------|----------------------------------------|-------------------------------|-----------------------------|
| <b>Data Filename</b>   | ESI202104224.d                         | <b>Sample Name</b>            | B6-WXH-100-5                |
| <b>Sample ID</b>       |                                        | <b>Position</b>               | P1-A1                       |
| <b>Instrument Name</b> | Agilent G6520 Q-TOF                    | <b>Acq Method</b>             | 20160322_MS_ESIH_POS_1min.m |
| <b>Acquired Time</b>   | 9/14/2021 19:31:21                     | <b>IRM Calibration Status</b> | Success                     |
| <b>DA Method</b>       | small molecular data analysis method.m | <b>Comment</b>                | ESI202104224.d              |

### User Spectra

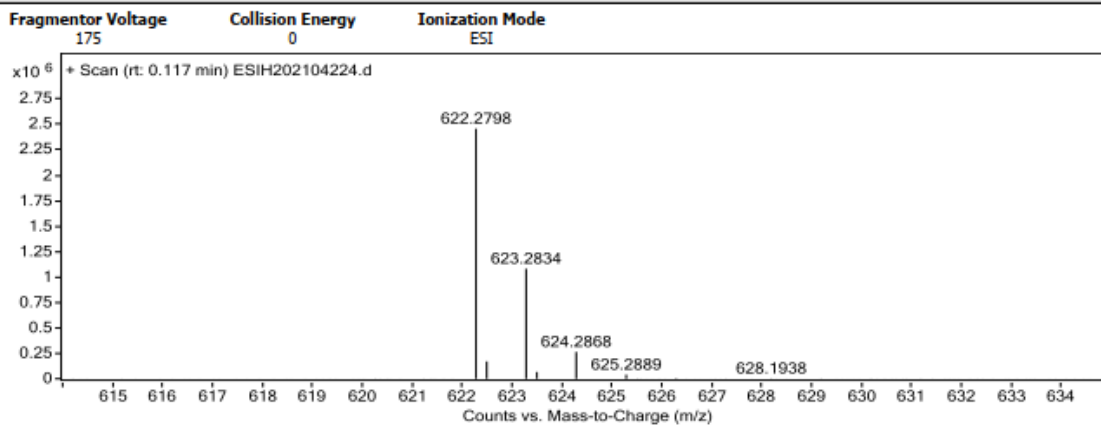

### Formula Calculator Results

| m/z      | Calc m/z | Diff (mDa) | Diff (ppm) | Ion Formula  | Ion    |
|----------|----------|------------|------------|--------------|--------|
| 622.2798 | 622.2799 | 0.17       | 0.28       | C38 H40 N O7 | (M+H)+ |

--- End Of Report ---



15, <sup>1</sup>H NMR (600 MHz, Chloroform-*d*) and <sup>13</sup>C NMR (150 MHz, Chloroform-*d*)

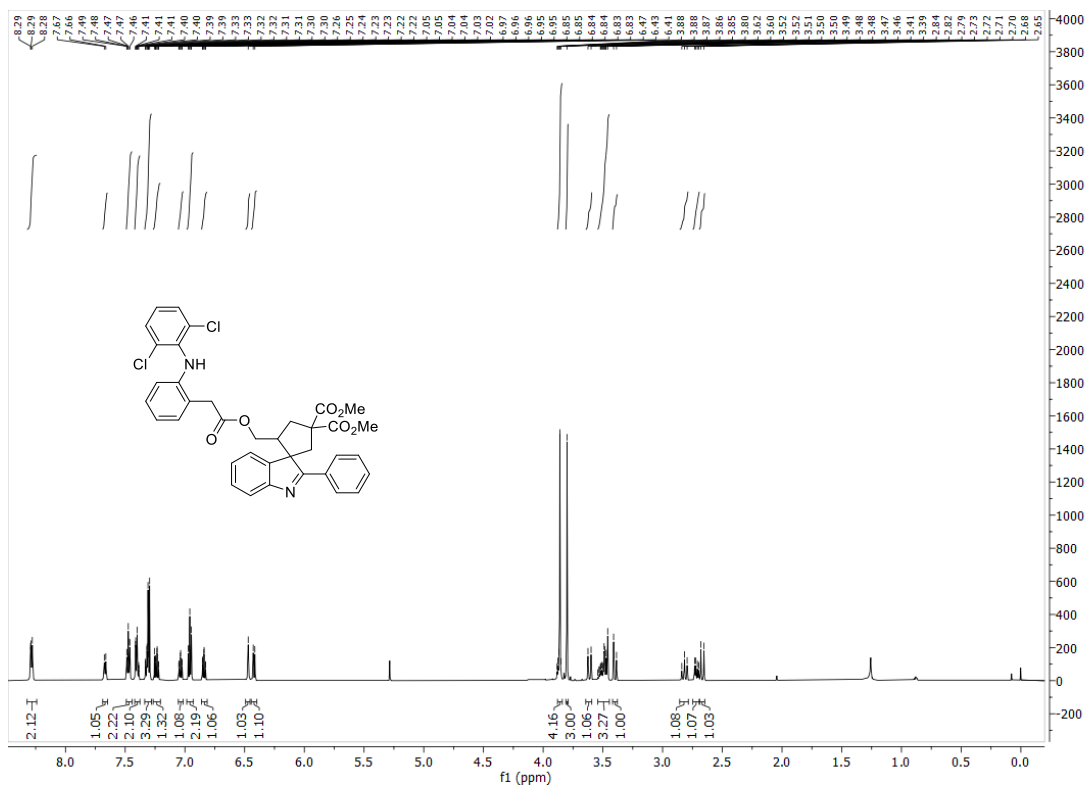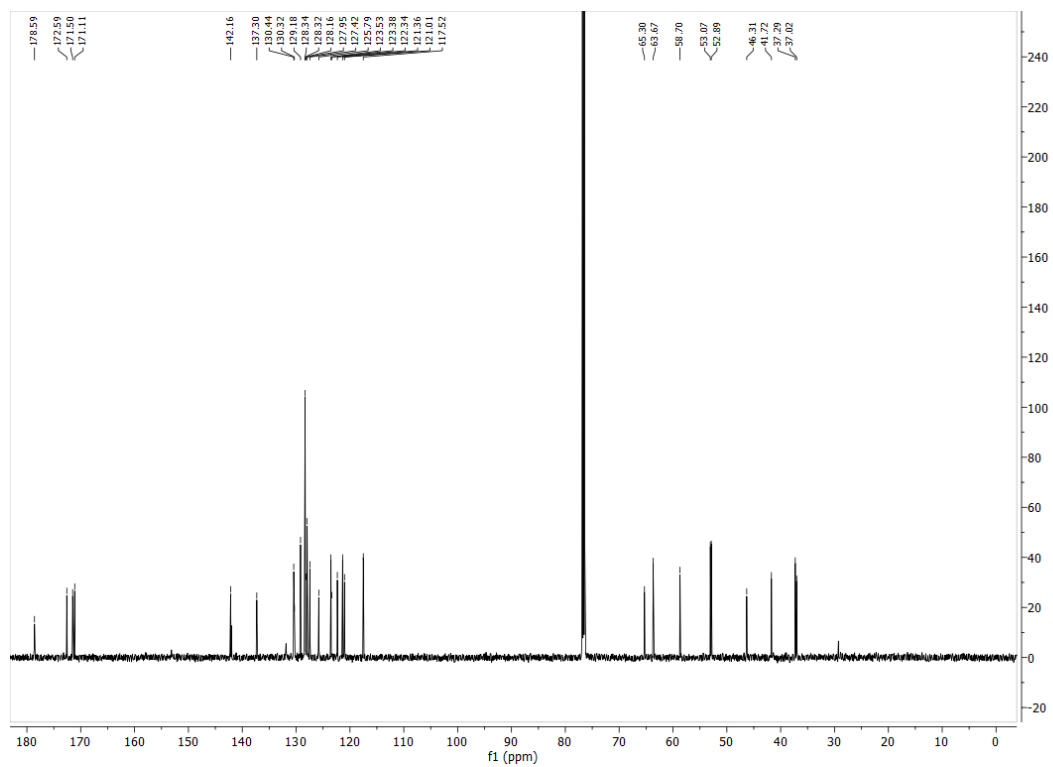

## Qualitative Analysis Report

**Data Filename** ESIH202104229.d  
**Sample ID**  
**Instrument Name** Agilent G6520 Q-TOF  
**Acquired Time** 9/14/2021 19:37:48  
**DA Method** small molecular data analysis method.m

**Sample Name** B6-WXH-100-8  
**Position** P1-A6  
**Acq Method** 20160322\_MS\_ESIH\_POS\_1min.m  
**IRM Calibration Status** Success  
**Comment** ESIH by zhuzhenyun

### User Spectra

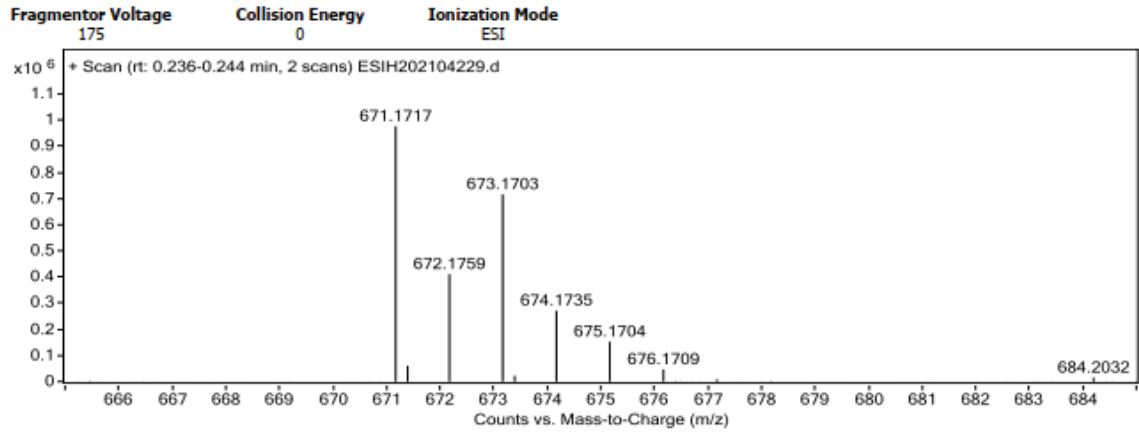

### Formula Calculator Results

| m/z      | Calc m/z | Diff (mDa) | Diff (ppm) | Ion Formula       | Ion                |
|----------|----------|------------|------------|-------------------|--------------------|
| 671.1717 | 671.171  | -0.73      | -1.09      | C37 H33 Cl2 N2 O6 | (M+H) <sup>+</sup> |

--- End Of Report ---



## 14. X-Ray structures and data

### Sample preparation of **2a** and **5a**

Compound **2a** or **5a** (100mg) was dissolved in 5 mL DCM/MeOH (V/V= 2:1), and the solvent was slowly volatilized at temperature. The crystal of compound **2a** or **5a** was obtained after 24 h.

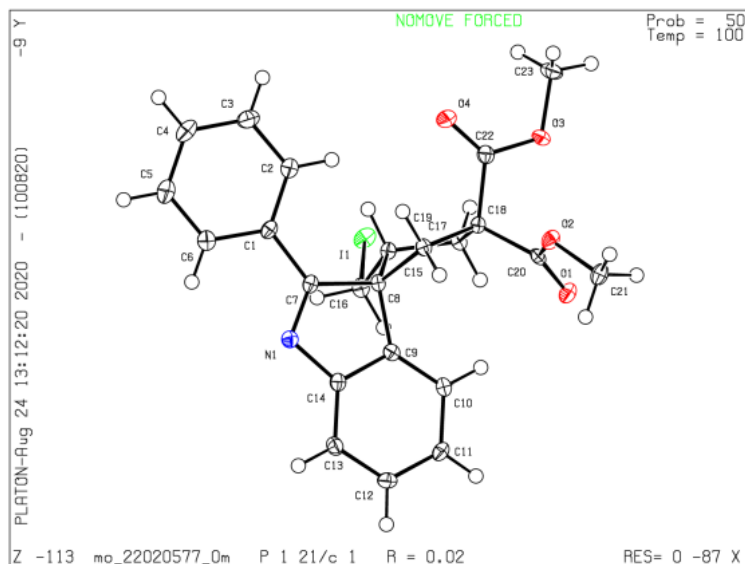

Figure S2: Crystal structure of compound **2a** (major) (CCDC: 2091594)

Table S3. Crystal data and structure refinement for compound **2a** (major)

|                     |                                                  |
|---------------------|--------------------------------------------------|
| Identification code | mo_22020577_0m                                   |
| Empirical formula   | C <sub>23</sub> H <sub>22</sub> INO <sub>4</sub> |
| Formula weight      | 503.31                                           |
| Temperature/K       | 100.0                                            |
| Crystal system      | monoclinic                                       |
| Space group         | P2 <sub>1</sub> /c                               |
| a/Å                 | 15.4121(6)                                       |
| b/Å                 | 8.5604(3)                                        |
| c/Å                 | 15.8404(6)                                       |
| $\alpha$ /°         | 90                                               |

|                                                |                                          |
|------------------------------------------------|------------------------------------------|
| $\beta/^\circ$                                 | 98.3650(10)                              |
| $\gamma/^\circ$                                | 90                                       |
| Volume/ $\text{\AA}^3$                         | 2067.65(13)                              |
| Z                                              | 4                                        |
| $\rho_{\text{calc}}/\text{cm}^3$               | 1.617                                    |
| $\mu/\text{mm}^{-1}$                           | 1.578                                    |
| F(000)                                         | 1008.0                                   |
| Crystal size/ $\text{mm}^3$                    | 0.15 × 0.11 × 0.04                       |
| Radiation                                      | MoK $\alpha$ ( $\lambda = 0.71073$ )     |
| 2 $\Theta$ range for data collection/ $^\circ$ | 5.422 to 52.758                          |
| Index ranges                                   | -19 ≤ h ≤ 19, -10 ≤ k ≤ 10, -19 ≤ l ≤ 19 |
| Reflections collected                          | 14064                                    |
| Independent reflections                        | 4138 [Rint = 0.0309, Rsigma = 0.0300]    |
| Data/restraints/parameters                     | 4138/0/264                               |
| Goodness-of-fit on F <sup>2</sup>              | 1.064                                    |
| Final R indexes [I ≥ 2 $\sigma$ (I)]           | R1 = 0.0219, wR2 = 0.0504                |
| Final R indexes [all data]                     | R1 = 0.0244, wR2 = 0.0524                |
| Largest diff. peak/hole / e $\text{\AA}^{-3}$  | 0.40/-0.44                               |

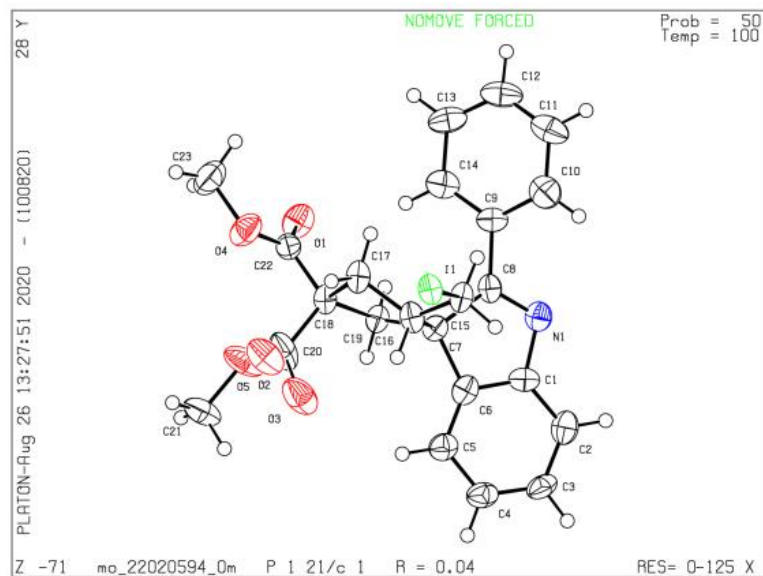

**Figure S3: Crystal structure of compound 2a (minor) (CCDC: 2096977)**

**Table S4. Crystal data and structure refinement for compound 2a (minor)**

|                            |                                                    |
|----------------------------|----------------------------------------------------|
| <b>Identification code</b> | <b>mo_22020594_0m</b>                              |
| <b>Empirical formula</b>   | <b>C<sub>23</sub>H<sub>22</sub>INO<sub>4</sub></b> |
| <b>Formula weight</b>      | <b>503.31</b>                                      |
| <b>Temperature/K</b>       | <b>100.0</b>                                       |
| <b>Crystal system</b>      | <b>monoclinic</b>                                  |
| <b>Space group</b>         | <b>P21/c</b>                                       |
| <b>a/Å</b>                 | <b>8.0055(2)</b>                                   |
| <b>b/Å</b>                 | <b>15.3728(5)</b>                                  |
| <b>c/Å</b>                 | <b>17.6184(4)</b>                                  |
| <b>α / °</b>               | <b>90</b>                                          |
| <b>β / °</b>               | <b>101.5710(10)</b>                                |
| <b>γ / °</b>               | <b>90</b>                                          |

|                                                   |                                                |
|---------------------------------------------------|------------------------------------------------|
| <b>Volume/Å<sup>3</sup></b>                       | <b>2124.18(10)</b>                             |
| <b>Z</b>                                          | <b>4</b>                                       |
| <b>ρ calcg/cm<sup>3</sup></b>                     | <b>1.574</b>                                   |
| <b>μ /mm-1</b>                                    | <b>1.536</b>                                   |
| <b>F(000)</b>                                     | <b>1008.0</b>                                  |
| <b>Crystal size/mm<sup>3</sup></b>                | <b>0.15 × 0.08 × 0.05</b>                      |
| <b>Radiation</b>                                  | <b>MoKα (λ = 0.71073)</b>                      |
| <b>2θ range for data collection/°</b>             | <b>4.72 to 52.78</b>                           |
| <b>Index ranges</b>                               | <b>-8 ≤ h ≤ 10, -19 ≤ k ≤ 15, -22 ≤ l ≤ 20</b> |
| <b>Reflections collected</b>                      | <b>14703</b>                                   |
| <b>Independent reflections</b>                    | <b>4305 [Rint = 0.0285, Rsigma = 0.0308]</b>   |
| <b>Data/restraints/parameters</b>                 | <b>4305/0/273</b>                              |
| <b>Goodness-of-fit on F<sup>2</sup></b>           | <b>1.040</b>                                   |
| <b>Final R indexes [I ≥ 2σ (I)]</b>               | <b>R1 = 0.0434, wR2 = 0.1082</b>               |
| <b>Final R indexes [all data]</b>                 | <b>R1 = 0.0534, wR2 = 0.1176</b>               |
| <b>Largest diff. peak/hole / e Å<sup>-3</sup></b> | <b>1.31/-0.53</b>                              |

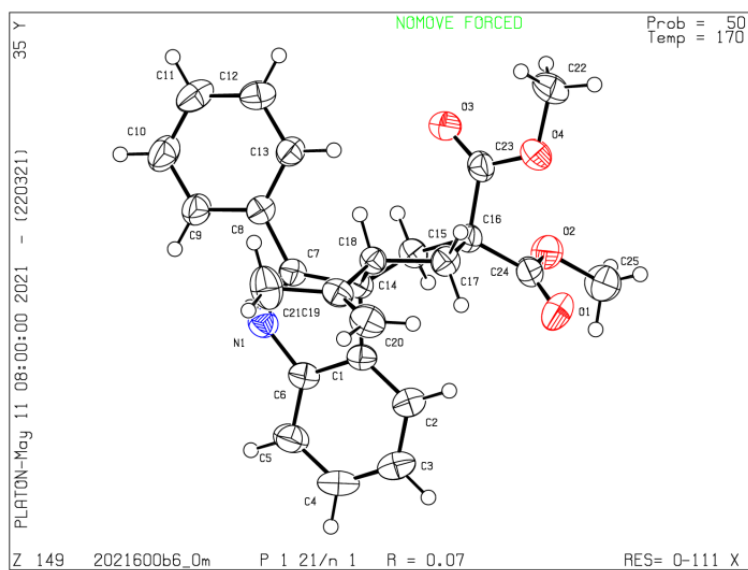

**Figure S4: Crystal structure of compound 5a (CCDC: 2091597)**

**Table S5. Crystal data and structure refinement for compound 5a**

|                              |                                                   |
|------------------------------|---------------------------------------------------|
| <b>Identification code</b>   | <b>2021600B6_0m</b>                               |
| <b>Empirical formula</b>     | <b>C<sub>25</sub>H<sub>25</sub>NO<sub>4</sub></b> |
| <b>Formula weight</b>        | <b>403.46</b>                                     |
| <b>Temperature/K</b>         | <b>170</b>                                        |
| <b>Crystal system</b>        | <b>monoclinic</b>                                 |
| <b>Space group</b>           | <b>P21/n</b>                                      |
| <b>a/Å</b>                   | <b>9.216(5)</b>                                   |
| <b>b/Å</b>                   | <b>21.035(10)</b>                                 |
| <b>c/Å</b>                   | <b>10.878(6)</b>                                  |
| <b><math>\alpha</math>/°</b> | <b>90</b>                                         |
| <b><math>\beta</math>/°</b>  | <b>98.207(19)</b>                                 |
| <b><math>\gamma</math>/°</b> | <b>90</b>                                         |
| <b>Volume/Å<sup>3</sup></b>  | <b>2087.3(19)</b>                                 |



|                                                                           |                                                                |
|---------------------------------------------------------------------------|----------------------------------------------------------------|
| <b>Z</b>                                                                  | <b>4</b>                                                       |
| <b><math>\rho_{\text{calc}}/\text{cm}^3</math></b>                        | <b>1.284</b>                                                   |
| <b><math>\mu/\text{mm}^{-1}</math></b>                                    | <b>0.087</b>                                                   |
| <b>F(000)</b>                                                             | <b>856.0</b>                                                   |
| <b>Crystal size/<math>\text{mm}^3</math></b>                              | <b>0.12 × 0.06 × 0.03</b>                                      |
| <b>Radiation</b>                                                          | <b>MoK<math>\alpha</math> (<math>\lambda = 0.71073</math>)</b> |
| <b>2<math>\Theta</math> range for data collection/<math>^\circ</math></b> | <b>3.872 to 53.104</b>                                         |
| <b>Index ranges</b>                                                       | <b>-11 ≤ h ≤ 10, -26 ≤ k ≤ 24, -13 ≤ l ≤ 13</b>                |
| <b>Reflections collected</b>                                              | <b>15977</b>                                                   |
| <b>Independent reflections</b>                                            | <b>4292 [Rint = 0.0859, Rsigma = 0.0859]</b>                   |
| <b>Data/restraints/parameters</b>                                         | <b>4292/0/274</b>                                              |
| <b>Goodness-of-fit on F<sup>2</sup></b>                                   | <b>1.007</b>                                                   |
| <b>Final R indexes [<math>I \geq 2\sigma(I)</math>]</b>                   | <b>R1 = 0.0664, wR2 = 0.1388</b>                               |
| <b>Final R indexes [all data]</b>                                         | <b>R1 = 0.1381, wR2 = 0.1799</b>                               |
| <b>Largest diff. peak/hole / e <math>\text{\AA}^{-3}</math></b>           | <b>0.62/-0.21</b>                                              |
